# Supplementary material for: Hempseed and hempseed protein extract: antioxidant potential, peptidomic analysis and muscle cell protection under heat stress conditions
Source: Research Square preprint supplement (doi:10.21203/rs.3.rs-6511890/v1), 2025-05-28
Supplement: Supplementary file 1 [file 1d86a7df80c9555b2d677285.xlsx]

## Sheet: Foglio1
HSD peptides
Peptide Sequence	Protein Name	Accession Code
AHCFAnWSRVAHVSDVWTSFLPDCAAATLIADmPQ	uncharacterized protein LOC115695254 [Cannabis sativa]	1731733128
AHHnKFCPWVnGNVAAAGSTSSGS	uncharacterized protein LOC115697910 [Cannabis sativa]	1731738546
AISLGPGGYGGAPSGTNNATNNSnnnNT	zinc finger CCCH domain-containing protein 12-like [Cannabis sativa]	1731719686
ALPPDYqEFPMGRFGPPGPGYEmGGmDRRFPHGGqISP	uncharacterized protein LOC115721859 [Cannabis sativa]	1731720940
ALPPRAYmGqQVPNmPPSGNQAFGGGVVEGAAFGSLN	probable ADP-ribosylation factor GTPase-activating protein AGD14 [Cannabis sativa]	1731675618
ALPPRAYmGqqVPNmPPSGNQAFGGGVVEGAAFGSLN	probable ADP-ribosylation factor GTPase-activating protein AGD14 [Cannabis sativa]	1731675618
AmHIAAANGnEHCVVLLLEYG	potassium channel AKT1 [Cannabis sativa]	1731665394
ANRGAGGSGELVSNnCAMSTASGGSPNLGN	uncharacterized protein LOC115725182 isoform X2 [Cannabis sativa]	1731730040
ASEGmEILQmIEKEFYqLQSLCEQKCEHL	uncharacterized protein LOC115709867 isoform X3 [Cannabis sativa]	1731686767
CLESMSLGVPLLAWPmHSDqPmnAALVTEFIKVG	zeatin O-xylosyltransferase [Cannabis sativa]	1731726449
DFNFAnSGLGYCEVQPGTGVEAPYGELINVHYTARFADG	photosynthetic NDH subunit of lumenal location 4, chloroplastic [Cannabis sativa]	1731690788
DQMEmHGDKIIHRTVDqSEmLGE	protein SCAR3 [Cannabis sativa]	1731739174
DSPVWISSNVPDDWMWHSSCEYDASPTPDIDInSVKRQS	DNA polymerase zeta catalytic subunit [Cannabis sativa]	1731719132
DYEFqVEYKEKKCGVmLDKGYCICGqWQIRGI	uncharacterized protein LOC115725710 [Cannabis sativa]	1731668771
EAAKQGQGGGGGQAKGGSSGEHDPGTRLNGGGGGGPSSGGTKGSSRGCqKAGEISRGREA	class E basic helix-loop-helix protein 22-like [Cannabis sativa]	1731673040
EAGRSWVEIEKEVHFFYnGDDSHP	putative pentatricopeptide repeat-containing protein At3g15130 [Cannabis sativa]	1731722513
EIKKPENHRHHLPSSDASSTVTM	light-inducible protein CPRF2 isoform X2 [Cannabis sativa]	1731695226
EPCDDQVFEnnTATAAATTSTNCPLTLPQ	uncharacterized protein LOC115707537 [Cannabis sativa]	1731681675
ESDEPVDSRQRSPQATDYDnGNRVVAGSPPSVM	mitogen-activated protein kinase kinase kinase YODA [Cannabis sativa]	1731703859
EYASAGSSFSLKSDSSDSSSDAKKnVnNVMGRGDDKNGSDLHD	protein CHROMATIN REMODELING 24 [Cannabis sativa]	1731695171
FAFAQCFGDLPPPDCRSCFAVA	cysteine-rich receptor-like protein kinase 42 isoform X2 [Cannabis sativa]	1731684998
FHGqnLPPPPPLPPH	THO complex subunit 2 [Cannabis sativa]	1731720799
FSmAPPGMPLAPSDSSSTVIRPNTMPPPG	pre-mRNA-processing protein 40C [Cannabis sativa]	1731742078
FSSFKTmLETDWYmNnALNPTPSSHHLHGLSLPPP	transcription factor ICE1 [Cannabis sativa]	1731744964
FTKMIGESWTNLSPEERTVYQ	high mobility group B protein 9 [Cannabis sativa]	1731667295
GQNPRVRDEEPnLGGAQPMDYG	basic salivary proline-rich protein 2-like [Cannabis sativa]	1731688319
GQPQGPPqqTQPSQQPQPTSSDEV	polyadenylate-binding protein RBP45 [Cannabis sativa]	1731682237
GSSDLAATKSPSSGGTNSKHGSKSGGSnCKPTDSPSIGPRGVYLGHDDTVEDVqF	WD-40 repeat-containing protein MSI4 [Cannabis sativa]	1731680124
HEEQVnHLERNLSVQERLQQGIFE	uncharacterized protein LOC115714601 isoform X2 [Cannabis sativa]	1731696535
HMSNPNLHLAGLPHGLHYGGNmSqFTSPGLSFnS	protein PAT1 homolog 2 [Cannabis sativa]	1731741955
HPmLAmAAAqNLAMFGHNPGFNPIYGRGYFVnP	UBP1-associated protein 2A [Cannabis sativa]	1731695139
HVASKWFGLELSGGAGGGGGGSGGPGGGPYY	protein QUIRKY [Cannabis sativa]	1731686100
KLFKVAGLPmVEnCmGGYNSCmFAYG	kinesin-like protein KIN-12E [Cannabis sativa]	1731713912
KLNFDADGFPSCRKnDDFIEKYFnSNVADSRNDEICSLY	uncharacterized protein LOC115709560 isoform X2 [Cannabis sativa]	1731685966
KYCGNnILKnGTQYFV	GDSL esterase/lipase At5g14450 [Cannabis sativa]	1731740909
LAFEMqGFGKLRmEqEEGDEELEPPESG	heat stress transcription factor A-2c isoform X2 [Cannabis sativa]	1731663775
LENPSNAAVAAATESAT	uncharacterized protein LOC115725245 isoform X2 [Cannabis sativa]	1731730289
LHDSSGGYDPNALPVISNInYLDMVAE	probable polygalacturonase [Cannabis sativa]	1731705655
LITTYEGSHNHPLPVTATAMASTTSAAASMLLSGSSTSSSNHDHP	probable WRKY transcription factor 72 isoform X2 [Cannabis sativa]	1731744733
LLQQQQQQQqqPNSSTTFTTATTTT	protein indeterminate-domain 4, chloroplastic [Cannabis sativa]	1731724061
LPEnAKVDqVKASmE	18.1 kDa class I heat shock protein-like [Cannabis sativa]	1731675369
LSQQQPMPIIIDEPAPnmAGmPGFPPS	mitochondrial import inner membrane translocase subunit TIM17-2 [Cannabis sativa]	1731689717
LVPKNPSEDVPLESm	pentatricopeptide repeat-containing protein At5g25630 [Cannabis sativa]	1731678102
MEPETSDSGSmTSGAAAGRGGMGPGAGGRSTRA	protein argonaute 1 [Cannabis sativa]	1731695348
mLVDLNEVGDMDFEKnDKKEDEDDDMIVRTAQIHE	uncharacterized protein LOC115703802 [Cannabis sativa]	1731673137
mNEPILEEAFHNSGRVILIFSVNmSGFFqGYAQMMS	zinc finger CCCH domain-containing protein 45 isoform X3 [Cannabis sativa]	1731706351
mnSAEKLSYASTmGGPAGqFDGLPKSFSVRSSRSTDTKDDDYAELVR	uncharacterized protein LOC115713417 [Cannabis sativa]	1731667050
NALGGGGGGGGGAGLFGAGLPEFEqVqQQLTQNPnMMR	ubiquitin domain-containing protein DSK2b isoform X2 [Cannabis sativa]	1731664237
NELLVLqLGADHPNGRYNISmCKIFGnHWnQDKR	rab9 effector protein with kelch motifs isoform X2 [Cannabis sativa]	1731714835
nITPnGDmTKQmKNRSSEEKEEGTHT	uncharacterized protein LOC115720663 [Cannabis sativa]	1731717608
NLFRTFPPqLHENRVTEGFDLEEEELPmEPA	serine/threonine protein phosphatase 2A 59 kDa regulatory subunit B' eta isoform [Cannabis sativa]	1731697475
nLGSmSFPAImGPGGGnQHVPGLE	transcription factor TCP20 [Cannabis sativa]	1731697275
NMPNPNHAqPSqPYPPqRKPSLEDTLQQFmQ	uncharacterized protein LOC115700155 [Cannabis sativa]	1731743713
NNGPGEDVLKELQGmW	transcription initiation factor IIA large subunit [Cannabis sativa]	1731714552
NNNCNNKEGRWAEQLLNPCATAITEGnCMRV	LOW QUALITY PROTEIN: nodulation-signaling pathway 1 protein [Cannabis sativa]	1731672840
NNNNNNnKVNINDHHQ	transcription factor bHLH94 [Cannabis sativa]	1731691509
NPmLTSPRQKAALVQGSqLHGSNSAGqALqGMQAMGMMGY	transcription initiation factor TFIID subunit 12b [Cannabis sativa]	1731680453
NqGWAPPVAGNPNmGWSGqVPGNANPnWGV	zinc finger CCCH domain-containing protein 19 [Cannabis sativa]	1731733484
NRFQKDEMPCNHAVAVMKDLNINTYNYCAQYYTSKAWLqTYEET	uncharacterized protein LOC115696528 [Cannabis sativa]	1731735386
NSTVNTIPFSGYAEAQSTLNHSVAnPAPnPGVVPGHG	histone H1 isoform X2 [Cannabis sativa]	1731675762
NVAAAQLGDPEKAEFFGLImACLnNSS	lipase-like PAD4 [Cannabis sativa]	1731697811
NVmACLFPRPAESEYVqGLTVGDAPLYVDMGVDE	uncharacterized protein LOC115716456 isoform X3 [Cannabis sativa]	1731705714
NYWPEKQGLTSSGGYPVSHGGGGGTQDHPVYmIPAHGA	trithorax group protein osa [Cannabis sativa]	1731718477
PEEATAALLLNnmDVGGRPMnVEMA	LOW QUALITY PROTEIN: serine/arginine repetitive matrix protein 2 [Cannabis sativa]	1731722183
PENIGSSSINHDYSEHTMqITQPIPT	uncharacterized protein LOC115706230 [Cannabis sativa]	1731678310
PqEVAAAATVAANNNnnAGKDDGGP	transcription factor MYB1R1 [Cannabis sativa]	1731686331
PSnTIqYPPQnSGLPVPQQRPPGMQMmQRPPMP	probable splicing factor 3A subunit 1 [Cannabis sativa]	1731742972
QAKEEGSKEEEnQSMFnVKnFLWHGGSAWDAWFSCASNQ	auxin transporter-like protein 2 [Cannabis sativa]	1731736599
QnPRVRDEEPNLGGAQPMDYG	basic salivary proline-rich protein 2-like [Cannabis sativa]	1731688319
QVKCLKFSDSMSDKDGEANTmKKIKPnDVMEEG	RNA pseudouridine synthase 3, mitochondrial isoform X1 [Cannabis sativa]	1731706144
RDNHSSnIVnPPEPVQGDQANVGVNIAQ	putative uncharacterized protein DDB_G0286901 [Cannabis sativa]	1731688446
REInSQKEnGGHEGGQILDKVSEDEG	uncharacterized protein LOC115704446 [Cannabis sativa]	1731674182
SCLRMEERLAYSSTEqDmVLLHHE	alpha-aminoadipic semialdehyde synthase [Cannabis sativa]	1731676454
SEKRVnSGCSVQVYRNGDIYEGEFHKGKCSGSGVY	uncharacterized protein LOC115710352 [Cannabis sativa]	1731666124
SKPVYQGSQTKNqGAHESSWKP	mechanosensitive ion channel protein 8 isoform X4 [Cannabis sativa]	1731667305
SLLPFqSPASTSSSSSSSSSSSSSSSSS	protein trichome birefringence-like 12 isoform X1 [Cannabis sativa]	1731719001
SmKTVNQSIGSAVPDPVPETSAPSGTSPPESSNGnEEVEGYSIYIRnL	nuclear transport factor 2 [Cannabis sativa]	1731746284
SnGEMSLALPPTERDLPNQGVSITS	methylmalonate-semialdehyde dehydrogenase [acylating], mitochondrial [Cannabis sativa]	1731691740
STPANQHSPPPPPPPPPPETTGNRYVFAAATPYPSQYPNPnPPPYYHHHP	probable E3 ubiquitin-protein ligase LUL2 [Cannabis sativa]	1731712953
TEDLFVHQSAIRSDGFRSLADGETVEFQIETENN	cold shock domain-containing protein 4 [Cannabis sativa]	1731745024
TGVLGPQSLGmNANFMFPqGAMPYNMPPGFM	protein MODIFIED TRANSPORT TO THE VACUOLE 1 [Cannabis sativa]	1731681589
TmQLDQQQQQQqqPNHHHESLSVGVGDqAWEDYGCILW	protein saal1 [Cannabis sativa]	1731681163
TnAYEYTVKAGGLqREVDYPYTGS	probable cysteine protease RD19B [Cannabis sativa]	1731670280
TPATSQEVEDTREFAYESWSVRGPTRWGMIRPEWRMCnNGTMQS	alpha carbonic anhydrase 7 [Cannabis sativa]	1731710587
TYLSGLVGLmSYSRGVIFEEFNHHRHHRNSNAEEDqLDTRmNLEGPS	U-box domain-containing protein 19 [Cannabis sativa]	1731686128
VGGVQGNVGSSYHqNISLPEGDISLINDNDSVLqGmHSVNLSVDEDqF	BEACH domain-containing protein C2 [Cannabis sativa]	1731679420
VGmGGGnGVGVGAGGSGSGGGVnMNGNIQRQGS	bZIP transcription factor TRAB1 [Cannabis sativa]	1731671792
VGmGGGNGVGVGAGGSGSGGGVNMnGNIQRQGS	bZIP transcription factor TRAB1 [Cannabis sativa]	1731671792
VISSNSSPVAPPVAAAHCMTnCTTVPELV	heat stress transcription factor B-2b [Cannabis sativa]	1731705221
VNInAPNLTTFCLEYSYVHSNHQQRRCC	uncharacterized protein LOC115704598 [Cannabis sativa]	1731674419
VVRHPGnMRSSSGECIEGmLGDYVNGGKAK	uncharacterized protein LOC115718704 isoform X1 [Cannabis sativa]	1731711121
WLGAWAISYTYNFFmSWSAYGTYFIYSGFSLLAV	sugar transporter ERD6-like 16 [Cannabis sativa]	1731723079
WQGmVDHVAPSSMADYIARVLPEAIVHKLPnEGHFSYYFFCDEC	uncharacterized protein LOC115706821 [Cannabis sativa]	1731679837
YEYmKNGSLADFLFNSKTRKPNWEERI	G-type lectin S-receptor-like serine/threonine-protein kinase LECRK3 [Cannabis sativa]	1731666925
YGSCADAAISGIMPPPLmELQSSqRYFCAVTVGDDA	rab3 GTPase-activating protein non-catalytic subunit [Cannabis sativa]	1731737082
YnYNYGPAGQALGLELLSNPDLVATDA	endochitinase [Cannabis sativa]	1731691666
AADNLFKLDPNDSGNHVVLSnmFAADG	pentatricopeptide repeat-containing protein At4g14850 [Cannabis sativa]	1731746023
AAEMEILNTRCNSmLmEAKVQVDELTRRNSSmE	kinesin-like protein KIN-7O [Cannabis sativa]	1731741969
AAQTAMISGYVqSKRMDEASEIFNHIGMRD	pentatricopeptide repeat-containing protein At2g35030, mitochondrial [Cannabis sativa]	1731742886
AARLEMAPMAANAAWnMGEWDQMA	LOW QUALITY PROTEIN: serine/threonine-protein kinase TOR [Cannabis sativa]	1731663306
ADLGLEEEAEKLFGEMKQSKNSLPDSWSYTAmLN	pentatricopeptide repeat-containing protein At5g46580, chloroplastic [Cannabis sativa]	1731706181
ADVDLNLTMAGGLPFnHFGRRSmFDNmQEGDmGRDLMIGQPAGSEVG	uncharacterized protein LOC115697910 [Cannabis sativa]	1731738546
AEAEEATREAEEAEADAETAqAYADAAmKTLKARnAQKmMM	telomere repeat-binding factor 1 [Cannabis sativa]	1731672164
AEEGmFLSQPGNGVGGNLLPATVCGFV	uncharacterized protein LOC115707993 isoform X2 [Cannabis sativa]	1731682794
AEGALGnnTTHGPNQNIGVDmE	uncharacterized protein LOC115709552 [Cannabis sativa]	1731685948
AEGYGGVAVGGYGGGGGGGSGSGGGYAGVGEGGATG	glycine-rich cell wall structural protein 1.8-like [Cannabis sativa]	1731709226
AEMEALLSGSAPSSSSQLITNNNNNNLnHnHNHNHDYSTSTTNTL	zinc finger protein WIP2 [Cannabis sativa]	1731683955
AEYGNIGRFVNHCCNPNLYAqNVLYD	uncharacterized protein LOC115716228 [Cannabis sativa]	1731705145
AFEHGGGGGRGGYGGGDRRRDnY	LOW QUALITY PROTEIN: transcription initiation factor TFIID subunit 15b [Cannabis sativa]	1731711997
AFmTTLHVPLSNSTSQN	callose synthase 9 [Cannabis sativa]	1731714611
AGASnGGVLAGLAACGVMMnIVSTASDLTqD	probable metal-nicotianamine transporter YSL7 [Cannabis sativa]	1731746481
AGEAFqGSKGMSELqqQTSTASSSSERSRGDATPLP	protein EARLY FLOWERING 3 [Cannabis sativa]	1731737486
AGGVPGNVDFSKILNDPELmAAFSDPEVMAALQD	FAM10 family protein At4g22670 isoform X2 [Cannabis sativa]	1731705291
AGPGTGAGGGSLHnAGSASDAGDAVMA	kinesin-like protein KIN-13A [Cannabis sativa]	1731724944
AIELGTVVPFTTMQGAVSKnm	dihydrolipoyllysine-residue acetyltransferase component 5 of pyruvate dehydrogenase complex, chloroplastic [Cannabis sativa]	1731668544
AIENALLACYGKCGEIDHCEKIFSRMSGRRDDVSWNSMISGYIHn	putative pentatricopeptide repeat-containing protein At5g09950 [Cannabis sativa]	1731737586
AIGGHVQASASREQMGYTFDALKTYVPqM	mitochondrial-processing peptidase subunit alpha [Cannabis sativa]	1731675240
AINnSDLPnLSPEDAIERDCLVYRSYIALGSYQ	coatomer subunit epsilon-1 [Cannabis sativa]	1731737544
AISKqVEELDNSGRLAEETqGTTVLENTGGPNSSFK	DUF724 domain-containing protein 7-like [Cannabis sativa]	1731690199
AITQLSVDVSNMDCSSADAGnTG	uncharacterized protein LOC115698826 isoform X5 [Cannabis sativa]	1731669559
AKETEKTSqGAIGGNADqKGDSLR	protein SPP41 isoform X2 [Cannabis sativa]	1731675281
AKLSDmGISKRLDGNMSSLAPHATGCGSSGWqA	serine/threonine-protein kinase/endoribonuclease IRE1a isoform X2 [Cannabis sativa]	1731671026
ALEEAQqqLSTDPLNEEKmLAEqEAC	uncharacterized protein LOC115695454 [Cannabis sativa]	1731733458
ALEEFGCFEAqCDKIPIHIRKGLFD	probable 2-oxoglutarate-dependent dioxygenase AOP1 isoform X2 [Cannabis sativa]	1731676036
ALGKFnnDGLENKREHMTNSSDSSRNSHG	germinal center kinase 1 isoform X2 [Cannabis sativa]	1731677495
ALqPHPNLKELEIKCYKGNSFPnWmGDHQCLSn	putative disease resistance RPP13-like protein 1 [Cannabis sativa]	1731686379
ALSKAGGKAFSNMAVGYNnVDVnAANKYG	glycerate dehydrogenase [Cannabis sativa]	1731664770
ALTGSPLQNNLMEYYCmVDFVREGFLGSSHEFRnRFQnPIENGQHTN	protein CHROMATIN REMODELING 20 isoform X2 [Cannabis sativa]	1731718922
AmAQVGGLVMLqPEVGGSRENFFFA	uncharacterized protein LOC115725510 [Cannabis sativa]	1731731281
AmAQVGGLVMLqPEVGGSRqNFFFA	uncharacterized protein LOC115714347 [Cannabis sativa]	1731695916
AmVCWALWKAQNKKVWKnQTSSLnEVMVSAnTSLD	uncharacterized protein LOC115716532 [Cannabis sativa]	1731667601
AnDGmnPLDVVVRILnNQLSSLM	LOW QUALITY PROTEIN: nuclear pore complex protein NUP62-like [Cannabis sativa]	1731708654
AnDNEVLIICCSLNNQTRH	glyoxylate/hydroxypyruvate reductase HPR3 [Cannabis sativa]	1731674954
AnMYRERqPLGTAAqSQDSKDY	aquaporin PIP1-1 [Cannabis sativa]	1731738060
ANNKLYGEVPESVCKIQSLSNFTLSDn	uncharacterized protein At4g06744 [Cannabis sativa]	1731671870
ANNNNRTQNLGGGGFGVGIGGGGGGGGGMNSK	uncharacterized protein DDB_G0283357 [Cannabis sativa]	1731722575
ANNQPGSqMPSGGTEAELPQSDSSQKS	uncharacterized protein LOC115705515 isoform X2 [Cannabis sativa]	1731676498
ANTVEAGNIGmCLKKFEDWS	uncharacterized protein LOC115695353 [Cannabis sativa]	1731733286
APANSPEADAEnSTAKGAGHmHAPAL	fasciclin-like arabinogalactan protein 10 [Cannabis sativa]	1731678653
APEVNNNNEAQCPESPKVSPFPSLPDmSPKKVSASH	retinoblastoma-related protein [Cannabis sativa]	1731676565
APITGEPQNGQQDIKGSESnnAS	BRCT domain-containing protein At4g02110 [Cannabis sativa]	1731663389
APPPGFGSHDRMEQSYDTFSGNRLLDTSSmLRNGYqqQASGNIGS	uncharacterized protein LOC115719388 isoform X5 [Cannabis sativa]	1731713584
APSVAPRMPMYPPGGPGIGQqIFY	polyadenylate-binding protein 8 [Cannabis sativa]	1731671835
AqALPCYAMSVFLLTKEICSnLEGm	uncharacterized protein LOC115713112 [Cannabis sativa]	1731693456
AQQVLPGmVERGRGTILFTGCSASLnGIAGYSELCC	3-ketodihydrosphingosine reductase [Cannabis sativa]	1731697781
AqVPIISFSATSPSLKmSSqQSSYFFQTATGDSSQV	glutamate receptor 2.8-like [Cannabis sativa]	1731667853
AqVRDGSNNPSTTDADATTGHAAPnTnPL	ubiquitin domain-containing protein DSK2b isoform X2 [Cannabis sativa]	1731664237
ARGMGFLYTEFSnYDLPHGNLKSSNVLLNHDHEPVLSDYA	pollen receptor-like kinase 3 isoform X2 [Cannabis sativa]	1731681939
ARVQHQNSTPGFQENSAIVDDDSTQAP	uncharacterized protein LOC115696292 [Cannabis sativa]	1731734991
ASAAAADqmMSSAVFGYDEKKLTASSSMnTSR	protein PHYTOCHROME KINASE SUBSTRATE 3 [Cannabis sativa]	1731684305
ASADSPSGLTNLGATCYANSILQCLYmnK	ubiquitin carboxyl-terminal hydrolase 26 isoform X3 [Cannabis sativa]	1731669223
ASEVKERTADAAHSATDSAnEAKDKTTDAAHSA	late embryogenesis abundant protein 1-like [Cannabis sativa]	1731724416
ASmnLITGPLPqSFGCLSKIEIL	uncharacterized protein At4g06744 [Cannabis sativa]	1731671870
ASPAIVTCSKqSImEAALAISDGKTESAnE	scarecrow-like protein 8 [Cannabis sativa]	1731705173
ASRSTPSVSGINTSNmVSRSGYSSqqLSCLMIqA	mediator of RNA polymerase II transcription subunit 23 [Cannabis sativa]	1731695442
ASSKGPFGAPFVVGCCVSGAGEY	putative threonine aspartase isoform X2 [Cannabis sativa]	1731679170
ASVqLPFSAGISCmEISRDGqTALLGINTRTENDGPSNnSWDSKL	BEACH domain-containing protein C2 [Cannabis sativa]	1731679420
ATAnALInCSnGLMKLSFGNMTmEVNIF	uncharacterized protein LOC115696563 [Cannabis sativa]	1731735440
ATAPNIAATNIYESTTSSqLIEYHTPMFnD	uncharacterized protein LOC115697166 isoform X2 [Cannabis sativa]	1731736676
ATEAGLAAnnKSEnKEKLAPASSSMNFLTNmHME	protein TIFY 10c [Cannabis sativa]	1731680612
ATMFAVMIGGLALGQSAPSm	ABC transporter B family member 1 [Cannabis sativa]	1731685713
ATPEAALSVNTLLqTFqq	uncharacterized protein LOC115716890 [Cannabis sativa]	1731667647
ATPHEIGSGELNHMKALDPGLVFETTTQDNFnFLC	CO(2)-response secreted protease isoform X2 [Cannabis sativa]	1731677560
ATVPqFDSIqDmHMKNFNVTGGDEINRNVDqQLKTKEDENV	transcriptional activator DEMETER isoform X2 [Cannabis sativa]	1731678005
AVAInAVFmqTYVGGVSCPYIC	cysteine protease RD19A [Cannabis sativa]	1731727327
AVGKKnHGnSSSSGnGDRPSP	uncharacterized protein LOC115699655 [Cannabis sativa]	1731669781
AVIqGMAERVSNGSVGSEYT	ARF guanine-nucleotide exchange factor GNOM [Cannabis sativa]	1731681915
AVKSMAGLLRSMSTPNQWRHVHqSDmWELPNSH	putative disease resistance RPP13-like protein 1 [Cannabis sativa]	1731673789
AVnGnGSSIVYCGSSDGLVNFWEREKQSFSHGG	protein JINGUBANG [Cannabis sativa]	1731669879
AVRLLSLPHNNmEDEKWCDIREKMLQGS	myosin-9 [Cannabis sativa]	1731705153
AVRLMEDMVGRGCRLDAGSYnAVmVAI	pentatricopeptide repeat-containing protein At2g17525, mitochondrial [Cannabis sativa]	1731671020
AVSNGSRPSQSTAVGLGPSEDMSGCDPVTLHWFW	PLASMODESMATA CALLOSE-BINDING PROTEIN 5 [Cannabis sativa]	1731739964
AVVqSIPTYVMSCFKLPSTFSHqLEQMMAnFWWGSDKDK	uncharacterized protein LOC115724021 [Cannabis sativa]	1731725923
AWNFCnEVGqEAPHTGSPRAADCFDLKGSSLKHK	uncharacterized protein LOC115713177 [Cannabis sativa]	1731663606
AWPDYSKmPPPGAGGVGGGnVMRPP	protein EXORDIUM-like 7 [Cannabis sativa]	1731738869
CDGSFSLNKPISHSFGTRVESYS	uncharacterized protein LOC115699992 isoform X1 [Cannabis sativa]	1731669889
CDVSFLqDNIGDGREGSMSGVqqKSHV	uncharacterized protein LOC115722274 isoform X2 [Cannabis sativa]	1731721968
CIFGTICGTVCGTGFGVCTTKVVnGMY	uncharacterized protein LOC115713281 [Cannabis sativa]	1731693722
CIRLSAQASFSSEVQTSLGSSMHQInNADE	paladin [Cannabis sativa]	1731663681
CKnLHFDnGSYIPSVGIGGGFCLLWN	uncharacterized protein LOC115713782 [Cannabis sativa]	1731694541
CLNYLKNGGAPGnGCCAGIKRLVGMAqTT	non-specific lipid-transfer protein 1 [Cannabis sativa]	1731735987
CQGKFEEYMELAIGnLnAMmATKIFnD	uncharacterized protein LOC115707531 [Cannabis sativa]	1731681665
CSCGGmKqFLDYYNQNKVLEFLTGLNESYASV	uncharacterized protein LOC115695109 [Cannabis sativa]	1731732887
CSRCNFPnIDPSKIqTFmPK	probable aspartyl protease At4g16563 [Cannabis sativa]	1731741045
CSVIVTGESIDVWWqPWIPWLDYDEFRALMETI	uncharacterized protein LOC115723998 [Cannabis sativa]	1731725862
CVAFVSKMFAVPKKmLPQRnSQGEFInnYIDESED	elongation factor-like GTPase 1 [Cannabis sativa]	1731713234
CVPIqAGNINNNHSTNmIQQEED	transcription factor MYB17-like [Cannabis sativa]	1731704466
CYDVMLKmKWNWQTLPYLTSLVVQGYGnEDDmESFPEEGLLPTT	putative disease resistance protein At3g14460 [Cannabis sativa]	1731725926
DAAINARNQMSGFGAVLMnSSGDIIAAm	uncharacterized protein LOC115695490 [Cannabis sativa]	1731733522
DADSIFTFDDYNEPLFNFmSTLPEDEQVILVGHSAGGIS	methylesterase 17-like [Cannabis sativa]	1731683627
DAGVSRSPSSYLNNPAAER	neutral ceramidase 2 [Cannabis sativa]	1731737580
DALGFSVDLNEKGKEmLNSFKmqVADnDQLAVQAED	protein BREAST CANCER SUSCEPTIBILITY 1 homolog [Cannabis sativa]	1731738229
DAPSSKDVKHDSERARSSSRnGSAS	casein kinase 1-like protein 10 isoform X2 [Cannabis sativa]	1731721096
DAVPIFTPPVSHqTVGRPqPGYGMPSnASRRLDETMATEIESLSLSSMDAM	TOM1-like protein 6 [Cannabis sativa]	1731736489
DAVYTTEEEANTKEEGnGAASDInQEIDATTLELSQVQAnYKDGAAKD	uncharacterized protein LOC115719393 [Cannabis sativa]	1731667944
DDHDLVTLVGAHTLGQTHCmFVNYRL	peroxidase 25 isoform X2 [Cannabis sativa]	1731727990
DDnQTSADTSAMSKITSTGAMTYSFIQAIERGHATTYGnMLnSMRSTI	metacaspase-1 [Cannabis sativa]	1731674745
DDPIAAALVNSYSnDPYLFSNDF	peroxidase 10 [Cannabis sativa]	1731665351
DEELKnAGIqQDAFVLCRIFQKSGTGPKnGEQYGAP	NAC domain-containing protein 53 [Cannabis sativa]	1731677736
DEGTMMGFDGSIYYFKMHDLFHDLAQSIMGNKCRSVEVNDDTHPIN	putative disease resistance protein RGA4 [Cannabis sativa]	1731713452
DFDAFICNSGSELYYPSSnHELDSPSGLP	probable sucrose-phosphate synthase 1 [Cannabis sativa]	1731669585
DFQGSLGSmSSRGTLYGEnLHAESnVLT	protein misato homolog 1 [Cannabis sativa]	1731745690
DFVnSnDnLFNPEEFRKQAHQVV	tryptophan decarboxylase TDC2 [Cannabis sativa]	1731730187
DGALFSASNSFGLGGLARDANGH	uncharacterized protein LOC115694977 [Cannabis sativa]	1731732675
DGDLYFISWDTGLIPPqTASPmDYTGRRPRIm	RNA-dependent RNA polymerase 2 [Cannabis sativa]	1731686114
DGEPLGGVGSAGQDDLATVMSqVLQ	ubiquitin-like domain-containing protein CIP73 isoform X3 [Cannabis sativa]	1731667270
DGHATMDSGDQLKK	CST complex subunit CTC1 isoform X3 [Cannabis sativa]	1731744220
DGISEnKYLnSTnNFVGRQIWEYHADAGT	beta-amyrin synthase isoform X2 [Cannabis sativa]	1731715197
DGLVSNPnDVnLPGPSQSVTSAFQ	peroxidase 57-like [Cannabis sativa]	1731726027
DGLVSNPnnVnLPGPSQSVTSAFQ	peroxidase 44 [Cannabis sativa]	1731725915
DGQNSIIIVGGAnMSCWPETLSDKDS	ribokinase [Cannabis sativa]	1731680781
DHEGTPSSSnTVSKARDQAGPSCSPAAnNVEDEIITDSHTMHVQGIPT	uncharacterized protein LOC115712944 [Cannabis sativa]	1731693054
DHQCTNNDVNGFSmGLPYELFQGNILGNMVCNTTTNTSTDQ	protein FEZ [Cannabis sativa]	1731740136
DIFFGWTAAVAKEMGIFHAFFSGCSGFGLACYYS	UDP-glycosyltransferase 92A1 [Cannabis sativa]	1731719814
DIGVGIGCGFNNNQmSSSGGGGGGGGGGSGSPSAV	LOB domain-containing protein 12-like [Cannabis sativa]	1731738763
DKGKAPAnHTSSTPIANSIRAFmGL	uncharacterized protein LOC115719830 [Cannabis sativa]	1731715453
DKGLKPDRxAYnFVIYGCCVNGETGKAFELRDDm	LOW QUALITY PROTEIN: putative pentatricopeptide repeat-containing protein At5g59900 [Cannabis sativa]	1731687047
DKHLFNRSmHYYCNqSSITCDnAGHITKILQ	LOW QUALITY PROTEIN: probable leucine-rich repeat receptor-like protein kinase At1g35710 [Cannabis sativa]	1731744077
DLFDIRqLPSGGGGGHTHSKIGSFHm	S-locus-specific glycoprotein S13-like [Cannabis sativa]	1731715908
DLHTFSSLESLYIEGWQGDSFPnDEGLLPTNLKTLDmSDCSKLET	putative disease resistance RPP13-like protein 1 [Cannabis sativa]	1731687240
DLSGHWLTHFPDTYTSLVSLNI	protein TRANSPORT INHIBITOR RESPONSE 1 [Cannabis sativa]	1731663855
DLSTSDHKTEAETILVDqSEqPSHnGEVEATTDHEAEKEAV	uncharacterized protein LOC115700605 [Cannabis sativa]	1731744565
DNDDKLQGqPqIIFNCNAATIPHPV	serine/threonine-protein kinase 4 isoform X2 [Cannabis sativa]	1731746509
DNDIILCDGTCNSAFHQKCLDPPLDT	pathogenesis-related homeodomain protein isoform X1 [Cannabis sativa]	1731731148
DNEGQTPLHYATmCEREAIAEYLVKQNADInVKDNDGNSPYDLCE	acyl-CoA-binding domain-containing protein 1 isoform X2 [Cannabis sativa]	1731705572
DNnPHLRYEPHALDESAGVVAGGGGVVEDVnHDSVYGGGGG	GATA transcription factor 25 [Cannabis sativa]	1731669281
DNPVSPNNGEKSTQDRPAnASEIGVWEmC	uncharacterized protein LOC115722733 [Cannabis sativa]	1731723091
DPANQRFVLLSDSCVPLYNFSYVYnYLMTSPRSFV	glycosyltransferase BC10 [Cannabis sativa]	1731682047
DPHVISMnSFVSGEEGLENHNFVELI	uncharacterized protein LOC115704540 [Cannabis sativa]	1731674325
DPnALTILLQDLQVAGL	protein DOWNY MILDEW RESISTANCE 6 [Cannabis sativa]	1731707328
DPnAPqDSVSGIMKIVPSDVDSEADYW	transcription factor E2FB [Cannabis sativa]	1731714293
DPnFSVMKLLRnMCESFLELGTDETDESQDGTVnLSTLDV	histone-lysine N-methyltransferase SUVR4 isoform X3 [Cannabis sativa]	1731693146
DPNSILVVEKFCRNKNNCAIELSEEnFSTSTCP	beta-galactosidase 10 [Cannabis sativa]	1731695884
DPSGLPTnTTAVASWqVVCnITVPKDSSPRCCVSFSAY	COBRA-like protein 7 [Cannabis sativa]	1731721826
DqAGGVAICAVPEIDKTPPPmKQKEE	katanin p80 WD40 repeat-containing subunit B1 homolog isoform X3 [Cannabis sativa]	1731737338
DQLPNLPPTMNSIGSVMHTQPQqQmSDAT	auxin response factor 19 [Cannabis sativa]	1731686064
DQnEDEQPISPTRSInSTKGLAEACKFVYn	senescence-associated protein SPA15, chloroplastic isoform X2 [Cannabis sativa]	1731741707
DQPEGGANALnVNSLR	protein TSS [Cannabis sativa]	1731732179
DqTPRGVSVSAQSCDVVLEDEEEPKEWMAQ	LOW QUALITY PROTEIN: protein BREVIS RADIX-like [Cannabis sativa]	1731707837
DSEFHSERGLIQSENIGPNDEWPSIEQPqAASLPSVMDRSEDTESY	uncharacterized protein LOC115697538 [Cannabis sativa]	1731737638
DSFGGNPFDAPVTYSnFLCTGnGFGFqKAPGLLTHT	methyl-CpG-binding domain-containing protein 9 [Cannabis sativa]	1731745116
DSLLSMDPqNEASqqAMELDFPMLPYFPYYVKGHCDGLI	F-box protein CPR1 [Cannabis sativa]	1731676410
DSNGKILDDInGDIDLRDVYFSYPARPDEqIF	ABC transporter B family member 11 [Cannabis sativa]	1731724794
DTPCTLARTSPLPFLNPNMPLHAHLnnIDSTSTSM	probable inactive purple acid phosphatase 27 [Cannabis sativa]	1731684180
DVPTVGTHEEASTSTGNAAFQVPPPSASMQRFPSmGnIPGQRVmTNSNG	protein transport protein SEC16B homolog [Cannabis sativa]	1731704580
DVSFSGSRqRFLAHNTIQVKGSWMnSDG	putative lipase ROG1 [Cannabis sativa]	1731687370
DYLCNRmYTLPLSGVESYLFqICYmmVHKPSP	phosphatidylinositol 4-kinase beta 1 [Cannabis sativa]	1731697292
EACYLCRKPLGYNS	FCS-Like Zinc finger 3 [Cannabis sativa]	1731666236
EAEMLKQANSRDCPETMSPGARnSRIYALEnMLSSSS	kinesin-like protein KIN-4C isoform X2 [Cannabis sativa]	1731667419
EAFMSELnGSGLVVnSHPYNEMMKLYmATSQFG	pentatricopeptide repeat-containing protein At5g27460 [Cannabis sativa]	1731727313
EAGVGPDNGVTTKHKIGTKQSGSTFDNmG	(R)-mandelonitrile lyase 1 [Cannabis sativa]	1731734517
EAITTDHSmIKDLnHnIqPLVQRF	uncharacterized protein LOC115700193 [Cannabis sativa]	1731743773
EALEIALnLSWnGLSGPIPSQ	LOW QUALITY PROTEIN: receptor-like protein kinase 2 [Cannabis sativa]	1731726253
EALnLLDYmKEQGVNP	pentatricopeptide repeat-containing protein At2g26790, mitochondrial [Cannabis sativa]	1731704871
ECYqmALSIKPNFSqSLNnLGVVYTVQGKMDAA	probable UDP-N-acetylglucosamine--peptide N-acetylglucosaminyltransferase SPINDLY [Cannabis sativa]	1731745772
EEPRRYEVPVHmDGqPHPYPPqAHHHNRHPHAV	protein QUIRKY [Cannabis sativa]	1731686100
EERLEEAEnYFSEANDRGIELDAAAYSI	pentatricopeptide repeat-containing protein At3g54980, mitochondrial [Cannabis sativa]	1731731556
EESVDMFMmILGHGAGNRMIQEHFqHSGE	uncharacterized protein LOC115723860 [Cannabis sativa]	1731725624
EEVENYVAGRGPTLMREIFnARSE	uncharacterized protein LOC115709327 [Cannabis sativa]	1731685431
EEVISARMAATEPQDEAVSQY	protein DDB_G0276689 isoform X2 [Cannabis sativa]	1731683680
EEYIGNKRmKLVETSQPENCEVNAn	two-component response regulator-like PRR95 isoform X1 [Cannabis sativa]	1731675533
EGHYTmQQNYTDFDIHVGQSYSFLLTTDqNASTDYYIV	monocopper oxidase-like protein SKS1 [Cannabis sativa]	1731678285
EGKMLIEMHEHHEHPVAVEMnVG	recQ-mediated genome instability protein 1 isoform X3 [Cannabis sativa]	1731672312
EGLMQPLCLVGSTLRAPHGCHTQYmAnmGSIASLV	phytochrome B isoform X2 [Cannabis sativa]	1731720595
EGVDHAVLGAWLEQMQLDHL	zinc finger CCCH domain-containing protein 30 [Cannabis sativa]	1731685322
EHDSTTPFVSnCLIDMYCKSGDIGDAQVVFnKmKHK	pentatricopeptide repeat-containing protein At5g16860 [Cannabis sativa]	1731714171
EIDNDDIISAFEGnSnLFWSERFGKQFLGmN	threonine synthase 1, chloroplastic [Cannabis sativa]	1731677866
EIEKSLLELHqVFLDMAVMVEAqGDqmDDIEHHVMNASNYVKD	syntaxin-related protein KNOLLE [Cannabis sativa]	1731724334
EIMEGLQAVqNDmGSVLGDPV	pyruvate, phosphate dikinase, chloroplastic [Cannabis sativa]	1731721986
EKDEGGFATGGWKSEDGKLSWGYSSFRGKRMTm	probable protein phosphatase 2C 76 [Cannabis sativa]	1731705055
EKFRLSPDqEAFYmALNALCKHEFIEEAEEFmHGnKKLF	pentatricopeptide repeat-containing protein At1g80880, mitochondrial [Cannabis sativa]	1731682647
EKKEFEGCKDVLEPISCGSnFnCnTmGKQFLLWR	protein DMR6-LIKE OXYGENASE 1 [Cannabis sativa]	1731709802
EKnLGnSGEVnLYAQmIDDAEGLE	importin subunit alpha-1 [Cannabis sativa]	1731721788
ELEAVPSMLVMEGPLEPqSSTVSTAADAPEDPSFVnFFS	mRNA-decapping enzyme-like protein [Cannabis sativa]	1731743004
ELESDMKAGYLELFSYIRVSLqnTF	uncharacterized protein LOC115720369 [Cannabis sativa]	1731716789
ELGSPEqRKEIANqLSGQmLTLSLQMYG	pumilio homolog 5 [Cannabis sativa]	1731696785
ELPISnSnLTSDESLTELTLRGFAnS	UDP-glycosyltransferase 43-like [Cannabis sativa]	1731732481
ELVInSnNFSCKVSSNWI	receptor-like protein EIX2 [Cannabis sativa]	1731733602
EmmQEVDQDNDGRIDYNEFVAMMqKGTIGGPAKKGLq	calcium-dependent protein kinase 1 [Cannabis sativa]	1731676189
ENEqFLDAAQIFmAPGTLVnSTVGQTI	subtilisin-like protease SBT4.14 [Cannabis sativa]	1731683638
ENGnPKGCWFTLKEGSRYSLMFTF	rho GDP-dissociation inhibitor 1 [Cannabis sativa]	1731681214
ENLIRPPmENGSTMLFVGELnWW	cleavage and polyadenylation specificity factor subunit CG7185 [Cannabis sativa]	1731695604
ENNKSLNLDCNGNSNSnGNGYLFP	probable WRKY transcription factor 27 [Cannabis sativa]	1731707783
EnPSVPSFnLKKPTFFTPTIGDGSSSYGnEVTFFNP	uncharacterized protein LOC115698247 [Cannabis sativa]	1731739277
EPGnHVKVVSGTqEGATGmVV	putative transcription elongation factor SPT5 homolog 1 [Cannabis sativa]	1731666222
EQEQEIKRANWVERLmEIRSHWVKNNEEIDEGNDRVCDDYD	phospholipase A1 PLIP1, chloroplastic [Cannabis sativa]	1731674784
EqKKGFGSGDFGVLGFLESmRKVGFC	pentatricopeptide repeat-containing protein At2g38420, mitochondrial [Cannabis sativa]	1731738967
EQLHNNGCGmARQPLAVSmQQFPSmYQHPSFHFAGARHLEASTTE	uncharacterized protein LOC115699549 [Cannabis sativa]	1731742525
EQQGnKSICELLLSYEnRKSnEH	potassium channel KAT1 isoform X2 [Cannabis sativa]	1731736692
EQSVmNGIGGLEEQVSTTAQSSSSAn	COP1-interactive protein 1 isoform X4 [Cannabis sativa]	1731704613
ERALEYmnIPEERLDGnHSLSPnWPYQGQIEF	ABC transporter C family member 13 isoform X3 [Cannabis sativa]	1731682611
ERGAPGAQLLRSWGFEQDELQDmGEMLSKMVM	protein misato homolog 1 [Cannabis sativa]	1731745690
ERLqGDYIEPERSGPSFCmGGKLELPGSEI	transcription termination factor MTERF4, chloroplastic [Cannabis sativa]	1731664812
ERNETEPLEKAEqDVMEAVFEAADEHEALVSEDVEVVAGEQALEVEEHN	methyl-CpG-binding domain-containing protein 11 [Cannabis sativa]	1731717698
ERRQPGYCTHCQIGKSPRCHHCSVCQRCVLKmDHHCIWVVNCVG	probable protein S-acyltransferase 12 [Cannabis sativa]	1731683236
ESFDYPMQSPRNFSGNFSSqKFLK	uncharacterized protein LOC115716091 isoform X2 [Cannabis sativa]	1731704783
ESRATGGmVLSEnDHVDCSFnPnDSMRV	DNA repair protein RAD4 isoform X3 [Cannabis sativa]	1731741675
ETLSEmLqKDGKVPDIFITmq	pentatricopeptide repeat-containing protein At4g35850, mitochondrial [Cannabis sativa]	1731745089
EVDGGGIATAIQHHGKEMSYNNYLDADA	uncharacterized protein LOC115706092 isoform X2 [Cannabis sativa]	1731677951
EVDLNNATQVWGSYVCQVSGSGTCTTT	uncharacterized protein LOC115698861 [Cannabis sativa]	1731669561
EVTNGSSSKTNDATSGISNSEPFTFqAGFVENDnVGQFHKSE	LOW QUALITY PROTEIN: uncharacterized protein LOC115711117 [Cannabis sativa]	1731689160
EYKDInGnHVGFDLNSmVSSAVADLGA	L-type lectin-domain containing receptor kinase VIII.1 [Cannabis sativa]	1731686745
FAPFPKGCMFHSEGGLMSFEHPMNKVKAMPRVDSEGVmCGAnFKVD	stem-specific protein TSJT1 [Cannabis sativa]	1731678334
FDDTDVRKSDGEETDGTEVLGDDDDLSDDVFVRGnGARSVDKGKGQCS	uncharacterized protein LOC115721948 isoform X2 [Cannabis sativa]	1731721172
FDEEMCNAILAVPIDPHnnDTLIWNH	uncharacterized protein LOC115696482 [Cannabis sativa]	1731735312
FDHTRWLFETKGTYGYGnAVWPKDGYGTGSGTNGFEH	cellulose synthase-like protein D5 [Cannabis sativa]	1731663373
FDIVSSATSSSIDLDTnKSRTnGEnHGNKNSKVGNSKVSSSSSSCGSLP	serine/threonine protein phosphatase 2A 59 kDa regulatory subunit B' eta isoform [Cannabis sativa]	1731697475
FDKmPERNLISWTALISGYAqCG	pentatricopeptide repeat-containing protein At1g71420 [Cannabis sativa]	1731720732
FDKPRKAFESGNRKQRGLPDYnGRGWHE	transcription factor VOZ1 [Cannabis sativa]	1731742615
FDKSLELDRSGmDSLPGQTTQmADNSLGASVQVVVq	mitogen-activated protein kinase kinase kinase NPK1-like [Cannabis sativa]	1731707013
FFNGIKNKATGNCPGKSFYnRDAFInAAnSFRQ	chitinase 5 [Cannabis sativa]	1731739384
FFSALDKKYGNGARmNRATNQGYW	NAC domain containing protein 50 [Cannabis sativa]	1731677748
FFSANTPSDLRDRLCTRLGMVPASnDS	uncharacterized protein LOC115711062 [Cannabis sativa]	1731689066
FGDSNVDVGnnNKLDISAKT	GDSL esterase/lipase At5g08460-like [Cannabis sativa]	1731688016
FGRPSISnNRTGPGQPSSSNGTRPSRPSSSNGT	protein SPT2 homolog [Cannabis sativa]	1731733626
FGSSTHSPSPSEMHSQLACKQTDSVISCSFnSTPnAPVLEVEKQQELQS	uncharacterized protein LOC115705235 isoform X4 [Cannabis sativa]	1731675834
FHHDHHRTSEHTRqICNNYRn	non-structural maintenance of chromosomes element 4 homolog A isoform X2 [Cannabis sativa]	1731712251
FHHqYHTTTSYYNSLmPSLLHNSTSTSSSTATNNNINnLSFRPS	transcription factor TCP5 [Cannabis sativa]	1731684748
FHVPDLEALGIECGYWLHLSVWnDSVmmCLT	putative F-box/LRR-repeat/kelch-repeat protein At1g11620 [Cannabis sativa]	1731703951
FIFGnAAVVFQGCDVVSKMPmAGQFTV	probable pectinesterase/pectinesterase inhibitor 12 [Cannabis sativa]	1731682002
FIHAEGLDCLQRnFPCnRDRSLYSN	probable LRR receptor-like serine/threonine-protein kinase At1g56140 [Cannabis sativa]	1731685068
FKDSDNGAKVGGGGSNGTTSVGEANmPQRqqTLGEmTLE	bZIP transcription factor TRAB1 [Cannabis sativa]	1731671792
FKNFTCHLETSECINSnSSNGYLCRC	putative wall-associated receptor kinase-like 16 [Cannabis sativa]	1731735912
FLISLASDNGISGLNKPGGDSGVQqGLCqLVENCNW	transcription factor bHLH3 [Cannabis sativa]	1731714068
FLSnSSSEKSSnNVGFSWHQGHQATEFG	auxin response factor 10 [Cannabis sativa]	1731712992
FLSSSDDTFFPQLNTHSHPRnDTFYn	glycosyltransferase BC10 [Cannabis sativa]	1731695465
FLVnnLGFNSSPVAYLSKEATGTNLLMGANFASAGSGYD	GDSL esterase/lipase At5g03810-like [Cannabis sativa]	1731744109
FLYCSMFPRNYGFVKDELVLLWmVDNI	putative disease resistance RPP13-like protein 1 [Cannabis sativa]	1731682826
FmGTLTNDGGSPFPTPPqANLnPqA	chloroplastic import inner membrane translocase subunit HP30-2 [Cannabis sativa]	1731706100
FNIPqqMImTSRNSLLTDGISPHSSAINSSS	homeobox protein ATH1 [Cannabis sativa]	1731665359
FPHIHPVAAVYDEILGGSGGSGVGGSSSDSSSARVEGTCY	fasciclin-like arabinogalactan protein 21 [Cannabis sativa]	1731696699
FPqGHVEHAQGNVDFGnSRIPSHVL	auxin response factor 16 [Cannabis sativa]	1731677887
FQKNmQIFQQSLQELENPAESRETSTSEYEI	uncharacterized protein LOC115695071 [Cannabis sativa]	1731732821
FqWSqTFKEPPSVWGEmLRPIPVALASCTRFFEAmSAM	AUGMIN subunit 2 [Cannabis sativa]	1731745431
FQYNSDPQNSAVAVSAFGSA	germin-like protein 9-3 [Cannabis sativa]	1731711129
FSFPNmKMFDGTSDPNDHIAqYRqRMFTVAIPRDMREA	uncharacterized protein LOC115696387 [Cannabis sativa]	1731735140
FSYLNNNIDLAmNEENNTKLL	probable O-methyltransferase 3 [Cannabis sativa]	1731721937
FTLEEFQmICVGHSPIVQELmRRQNVEEGHKDGSDSNINGSnGG	WD repeat-containing protein 44 isoform X2 [Cannabis sativa]	1731678318
FTqHSDHSTVDILVHmTEENmmAAKQDGL	DNA topoisomerase 2 [Cannabis sativa]	1731685672
FWHQPWIPWMELqEFMT	uncharacterized protein LOC115725244 [Cannabis sativa]	1731730282
GAFMRKSAnEAFDLLEEMAmT	uncharacterized protein LOC115723634 [Cannabis sativa]	1731725248
GAGLAmSPGDIAFKSnFATLDE	uncharacterized protein LOC115700581 [Cannabis sativa]	1731744496
GAIAMFGEKYGEQVRVVEVPGVSmELCG	alanine--tRNA ligase, chloroplastic/mitochondrial isoform X2 [Cannabis sativa]	1731664157
GALGqSSSGLSSFSTmDQEKDYLNSVIEVLASCHPN	putative 1-phosphatidylinositol-3-phosphate 5-kinase FAB1D isoform X2 [Cannabis sativa]	1731665937
GAPGLGQQLFYGqGPPAIIPPqPGFGYq	polyadenylate-binding protein 8 [Cannabis sativa]	1731698127
GAPLPPSGPSKGHnSDFPT	basic salivary proline-rich protein 1-like [Cannabis sativa]	1731662683
GDAqHIPGLPPRPnGRVAmISGGPH	uncharacterized protein LOC115723357 [Cannabis sativa]	1731668464
GDLPNnnNNNSSSPAIKTNWIMHEFHLSDSASASTSSTRSSSKRRS	NAC domain-containing protein 104 [Cannabis sativa]	1731731694
GDSLGRNqWESLICmVSASAPGSqTQmTRGD	protein PMR5 [Cannabis sativa]	1731715290
GDVmHRGRAESRGHDSYEIAKLAIqnHWGKFERPDSFDAS	protein IMPAIRED IN BABA-INDUCED STERILITY 1 [Cannabis sativa]	1731685511
GEANSVGVGRGGGGSDEGSSVGNNQRnm	E3 ubiquitin-protein ligase RZF1 isoform X2 [Cannabis sativa]	1731666355
GELELNHECNSMNWSPEDFESKLQEAmKqTYqRALKAATDFG	NADP-specific glutamate dehydrogenase [Cannabis sativa]	1731681859
GELHqLSqKEEQERKQAQEKTHGGAGGDQTVDVDP	uncharacterized protein At1g15400 [Cannabis sativa]	1731676154
GENmDLVSEDDNqVKTLENEVqDIHDVERFNCNIKMKD	DNA mismatch repair protein PMS1 isoform X2 [Cannabis sativa]	1731663975
GETQQALFLFEEMRKMDLDMDGF	pentatricopeptide repeat-containing protein At3g49710 isoform X2 [Cannabis sativa]	1731691278
GEWRHDENENFINGNYGIVNTILVSTESnMAL	sucrose nonfermenting 4-like protein [Cannabis sativa]	1731712132
GFKnmDVmPNSSSSGVSTADHSIFYSQNGTPTTNP	basic leucine zipper 9 [Cannabis sativa]	1731670499
GGAVPFYNLQQGNFNNNNNNNNnnnNALI	AT-hook motif nuclear-localized protein 25-like [Cannabis sativa]	1731671495
GGEYQAFESLVqEHGIHFQHS	uncharacterized protein LOC115709020 isoform X1 [Cannabis sativa]	1731684720
GGKKnTTERDEIYYPEWIYNH	rust resistance kinase Lr10 [Cannabis sativa]	1731689626
GGLPGQAFFnSnPVWVTGRDNLTSSTC	transcription factor MYC2 [Cannabis sativa]	1731707246
GGNGLPSETGLYFARIGIGSPSnDY	aspartic proteinase-like protein 2 [Cannabis sativa]	1731714779
GGnPSISLLDPSMYPTPLNAFMAGTQF	protein EXPRESSION OF TERPENOIDS 1 [Cannabis sativa]	1731670296
GGNPTPGSVGGIQSTSQPGGAqLAqH	nuclear transcription factor Y subunit C-9 [Cannabis sativa]	1731719864
GGTMPANLGqAFKnHmSEMFAYHA	plastidial pyruvate kinase 2 [Cannabis sativa]	1731705041
GHENLGAGKDEHPRKGQAEGSHK	uncharacterized protein LOC115695207 [Cannabis sativa]	1731733052
GHFGGLGRSGVnLPEPSSnSSASqVRPS	transcription initiation factor TFIID subunit 12 isoform X2 [Cannabis sativa]	1731687882
GHVYGSGGFHQMTGNSSGGGGGLGPKSGPDH	nuclear transcription factor Y subunit B-3 [Cannabis sativa]	1731732217
GIHDLTKAGGnnINAP	uncharacterized protein LOC115707750 isoform X2 [Cannabis sativa]	1731682157
GIIVDqLFFHDPDGHMIEICnCQnLPVLPLVSSSSS	uncharacterized protein LOC115719667 [Cannabis sativa]	1731714714
GILISGCQTHQTSADAAPGGnAAEAYGAL	metacaspase-4 [Cannabis sativa]	1731675622
GIqLREQDmSWGDFLSSVGTRSRNYSPCYQP	probable acyl-activating enzyme 18, peroxisomal [Cannabis sativa]	1731722145
GIQVHSSmIHKPSSSSSSFYHHQQnQPKTAIMMSP	uncharacterized protein DDB_G0283357 [Cannabis sativa]	1731679392
GITVSCHNVKSGNYKAFqCPP	chloride channel protein CLC-c [Cannabis sativa]	1731680083
GKDLISAmSKSnHSPGRFHLVmQLDG	G-type lectin S-receptor-like serine/threonine-protein kinase LECRK1 [Cannabis sativa]	1731668027
GKTTLAqSVYYDTNVqEH	putative disease resistance RPP13-like protein 1 [Cannabis sativa]	1731727015
GLAGImHVLMDMELTPDEVEDVKGTLHYMIDnRFP	LOW QUALITY PROTEIN: lanC-like protein GCL2 [Cannabis sativa]	1731681797
GLFSSTVLSSNPGGMRVYVCVHDTSPPDDQ	LOW QUALITY PROTEIN: uncharacterized protein LOC115710156 [Cannabis sativa]	1731687516
GLFSYSqqRRRRFDPTmASS	molybdenum cofactor sulfurase [Cannabis sativa]	1731704033
GLGLPPNNnqMLMnSTCAVEK	BEACH domain-containing protein B isoform X3 [Cannabis sativa]	1731712182
GLGPRESLTEAVnAVISLLGmQPCE	coatomer subunit gamma [Cannabis sativa]	1731696468
GLISEqWKEmGWQGPNPS	ELMO domain-containing protein C isoform X5 [Cannabis sativa]	1731739918
GLSSGFGVSCGILGACGDDQQGQLFVSNmnSRGVnLSR	uncharacterized protein LOC115701015 [Cannabis sativa]	1731670192
GLVHDMNNIRINSMAASENEETS	E3 ubiquitin-protein ligase Praja-2-like [Cannabis sativa]	1731709302
GMNFMVDTAIASFKLQMKnSYHTS	F-box/FBD/LRR-repeat protein At3g26920 [Cannabis sativa]	1731717497
GMSHGGHGQMGIPVGAPNGAVGYHGFESHHPYSMLq	transcription factor BOA [Cannabis sativa]	1731711980
GNANPNWGVPPSQVLP	zinc finger CCCH domain-containing protein 19 [Cannabis sativa]	1731733484
GNCVNGPGLGGGPKqSG	LOW QUALITY PROTEIN: protein unc-13 homolog [Cannabis sativa]	1731724211
GNESPAIPSVKmNLYSnDMHPIS	BTB/POZ domain-containing protein SR1IP1 [Cannabis sativa]	1731692782
GnGIEqEEDGDnmGVKEKPELTAVSQVPTAVP	uncharacterized protein LOC115709798 isoform X1 [Cannabis sativa]	1731686593
GNNSmANGRVGMPSLGRDqIMHHQ	transcriptional corepressor SEUSS [Cannabis sativa]	1731666112
GNPnVGTDDASVVASEQLDTNTVSNPQNEmQQmVQSETEKAS	double-stranded RNA-binding protein 1 [Cannabis sativa]	1731705679
GNTFQNFPSNPASICYLGnQnFNRNNNPYSNSYNSAWKH	uncharacterized protein LOC115695219 [Cannabis sativa]	1731733072
GPEHnLATEAGTDRLTLnSGSTSNPYGLP	autophagy-related protein 11 [Cannabis sativa]	1731728915
GPGCSSLGVGAFSENGPFRPnGK	serine carboxypeptidase-like 45 [Cannabis sativa]	1731704078
GPLRMREEYTEGVFET	probable plastid-lipid-associated protein 13, chloroplastic [Cannabis sativa]	1731745854
GPSPKSMSSFSPWIFTVGAASHDRIYS	subtilisin-like protease SBT2.2 isoform X2 [Cannabis sativa]	1731737508
GPVIKTNMGSKLEDESGCLSWLnGqPSESVVFLCFG	anthocyanidin 5,3-O-glucosyltransferase-like [Cannabis sativa]	1731703891
GPVYSCGMAAPVnKPRRPMSGPIATLFn	uncharacterized protein LOC115707196 [Cannabis sativa]	1731680806
GQGLEEAGqALEESSHELQEHGHEVMEHSQSLEDSIQVLEESRHEL	uncharacterized protein LOC115701404 [Cannabis sativa]	1731746442
GQPLSATTTTTSTNPKPTTAnPPATNNSGHNHK	uncharacterized protein LOC115713162 [Cannabis sativa]	1731693536
GqqYPPYVATSGGSGAAAAMYHNFYPL	RNA-binding protein 38 [Cannabis sativa]	1731678314
GQTSLAKLSGNGYmAPNPYPVMqYG	putative clathrin assembly protein At2g25430 [Cannabis sativa]	1731668041
GQVPAANNPQRNPALASKnYQnGVNASSEmSS	protein ROOT HAIR DEFECTIVE 3 isoform X2 [Cannabis sativa]	1731680130
GQVYGLSQVSHQAPPYTGTYqPVA	zinc finger CCCH domain-containing protein 34 [Cannabis sativa]	1731721736
GREAVTNFDPNSYDGEImMSEVDHDGSNQNLDLNLGIAPLSASNAEADDA	ethylene-responsive transcription factor RAP2-7 isoform X4 [Cannabis sativa]	1731684147
GRGPSGGHnGGGGYGGAGnRGGYGSAPAETPAKVK	LOW QUALITY PROTEIN: transcription initiation factor TFIID subunit 15b [Cannabis sativa]	1731711997
GSIGnYqqLLAEVAPSTSALYG	protein FATTY ACID EXPORT 4, chloroplastic [Cannabis sativa]	1731705195
GSKSqqASPHqPNHSSLPGASQMPFSTPNLSHmSNPNLH	protein PAT1 homolog 2 [Cannabis sativa]	1731741955
GSNGVIPFSYSSSQQGQqHMqPPQAMPLADQ	arginine/serine-rich protein PNISR [Cannabis sativa]	1731697331
GSQQYISLTVPELTQQmWDAK	tubulin beta-1 chain [Cannabis sativa]	1731669436
GSqRLPqQAQQHDQLPNLPPTmnSIGSVMHTQP	auxin response factor 19 [Cannabis sativa]	1731686064
GSRGPRRmqCImnAIPSSAIEPGGVAPTQSDFSV	tubby-like F-box protein 3 [Cannabis sativa]	1731722166
GSYPMmNGSGMPAVqGLPAqAMMNGGYYQGQGMGPGYGPGPGPIN	heavy metal-associated isoprenylated plant protein 34 [Cannabis sativa]	1731711820
GTNIELVACGEYHTCAVTISGDLYTWGDGTqSSSLLGHGSEVSH	PH, RCC1 and FYVE domains-containing protein 1 isoform X5 [Cannabis sativa]	1731744436
GVEAQSGTRVEAQLGnGLEIHQSTnSTI	uncharacterized protein LOC115711031 [Cannabis sativa]	1731689018
GVGHCLNIASRLYDGnPDDQMnLGFEAHLKWKC	peroxidase 29 [Cannabis sativa]	1731682049
GVLCmmEIFHFLCSLLNVVEnMG	ARF guanine-nucleotide exchange factor GNOM isoform X2 [Cannabis sativa]	1731674529
GVSNNNTTVDRFLEMTDmSLPENmHS	G-type lectin S-receptor-like serine/threonine-protein kinase At4g03230 [Cannabis sativa]	1731742260
GWFSQSDNGGDGLERPSSSLLADWNSYAASQ	protein transport protein SFT2 [Cannabis sativa]	1731733936
HAQPTqADGYCFLNNTGLAVNLAL	histone deacetylase 8-like [Cannabis sativa]	1731666361
HASFNAAAAQSSHMqFPGLYHPSqPTAIAN	GBF-interacting protein 1-like isoform X2 [Cannabis sativa]	1731680414
HCDINPNNILIDEnHCAKIADFGL	LOW QUALITY PROTEIN: G-type lectin S-receptor-like serine/threonine-protein kinase LECRK1 [Cannabis sativa]	1731666144
HDCASSVKMTqYDVETTKKVDGNYESVWRVnK	uncharacterized protein At3g61260 [Cannabis sativa]	1731697732
HDTVSGKNPTNVqVAEAPTTNTSATF	dirigent protein 21 [Cannabis sativa]	1731741572
HEERTNQGLLqDmVPLTILNPSGSTNNNMINTSNTSSYSSCSSNRSPPTSP	probable WRKY transcription factor 49 [Cannabis sativa]	1731732289
HESLKEAPKYSVSSENmFNGPEK	polyribonucleotide nucleotidyltransferase 2, mitochondrial [Cannabis sativa]	1731743022
HFANLTnLPCISSSMKELDLSnNSFSGD	receptor-like protein EIX2, partial [Cannabis sativa]	1731703751
HFARCLWFTSPGGIRS	uncharacterized protein LOC115717615 [Cannabis sativa]	1731708413
HFFDDWPRSLQESGnVEINNNNNNNNNNNNNRmRKSPMSSASSLSI	growth-regulating factor 3 [Cannabis sativa]	1731663177
HFGGSVPQLTPGLSANNNRmPNqWANqS	protein PAT1 homolog [Cannabis sativa]	1731684021
HFGLNYEKnFCGHFQNPTTmTISEKAHGRKFNSE	uncharacterized protein LOC115701045 isoform X2 [Cannabis sativa]	1731745569
HFHGGINNNNNNNQQQQQqQQQAAF	homeobox-leucine zipper protein HAT7 [Cannabis sativa]	1731744085
HGDSqAYLFDPDIYTDGRISVQGIDGVLFPPNEDP	fasciclin-like arabinogalactan protein 15 [Cannabis sativa]	1731746383
HGGqISPGGGGYNRNqDYWNSLGL	uncharacterized protein LOC115721859 [Cannabis sativa]	1731720940
HGNTSmSLVGNPRnDVAPQNDVGGNKLGEmPSIQHSG	light-inducible protein CPRF2 isoform X2 [Cannabis sativa]	1731695226
HGRMEVAEMLAHQMVESEAEDGAAnHTLLSmVYAESGnWCG	pentatricopeptide repeat-containing protein At4g31070, mitochondrial [Cannabis sativa]	1731685242
HHDNIISINSSNmVNLEFGFPWTNC	transcription factor bHLH110 isoform X2 [Cannabis sativa]	1731670227
HHPIDKFHNFTnDSMVEWARPLLMQALEnGNFD	proline-rich receptor-like protein kinase PERK15 [Cannabis sativa]	1731682412
HHqHLDHQLPNNNNMPSWQDHnnQQDQLPESWSQLLLG	transcription factor bHLH68 isoform X2 [Cannabis sativa]	1731662982
HIKYARYVFDDmFERnEAS	putative pentatricopeptide repeat-containing protein At5g52630 [Cannabis sativa]	1731685212
HKTTTILCVVFqGSHMLSFGSnCEnFLCRFGDE	transmembrane 9 superfamily member 5-like [Cannabis sativa]	1731688859
HPYLTSLHDISDEPVCMTPFnFDFEqRALTEEQmKALIYQEAm	mitogen-activated protein kinase homolog NTF4 [Cannabis sativa]	1731682957
HQDNSFIYTEPQTCTGLWLALEDATTTNGCLWAIP	phytanoyl-CoA dioxygenase isoform X2 [Cannabis sativa]	1731666638
HQMAVLSMCLVGDFVCSGSADKSIGIWKRqCYG	protein JINGUBANG [Cannabis sativa]	1731685770
HQNEDmLQKPPSPFIDTHqDqDTVVPDVPNHS	serine/threonine-protein phosphatase 4 regulatory subunit 2 [Cannabis sativa]	1731706245
HqQISSTPSSPSSSSYGLKLVPWmSWE	pre-rRNA-processing protein las1 isoform X3 [Cannabis sativa]	1731730059
HSSNGDVPHPASENLIMNPTHVSSDTSFD	uncharacterized protein LOC115710912 [Cannabis sativa]	1731688837
HSSSQQPPLHqSqMSTPSGPLq	pollen-specific leucine-rich repeat extensin-like protein 1 [Cannabis sativa]	1731689271
HTLDVYSNASGQLINYDKSVmSFSPNTSTADQNAFS	uncharacterized protein LOC115720302 [Cannabis sativa]	1731716619
HTMNLDGESTSDNEKKTSQIMLEGSSSDFq	uncharacterized protein LOC115720663 [Cannabis sativa]	1731717608
HTTDTCPINVGSLPmEQAHAIGNYQNnYG	uncharacterized protein LOC115699997 [Cannabis sativa]	1731743442
IADEAADASmVPRDFLSVnHPQQEVQSDnTLPDPPALDEEC	transcription factor MYBS3 [Cannabis sativa]	1731705498
IAEYFRDmGYNVSmMADSTSRWAEALRE	V-type proton ATPase catalytic subunit A [Cannabis sativa]	1731690762
IAGPNKRFQGnQGFRPGGnEn	uncharacterized protein LOC115695333 [Cannabis sativa]	1731733258
IAGqPAEVFSVNAVADGSVPGSVTmFqqPAQFGTSGM	protein transport protein SEC16B homolog [Cannabis sativa]	1731704580
IAGSCTSCYLTAGPFSRSAVnFnAGCKTA	sulfate transporter 3.1 [Cannabis sativa]	1731721726
IANSSQPAASASmLDSGNFVLYnSnSTIIWQSFD	G-type lectin S-receptor-like serine/threonine-protein kinase LECRK1 [Cannabis sativa]	1731666138
IAPSHmVLSKTmGGGGGGnGAIPEDIAGEIEEGGVTFSGn	VAN3-binding protein [Cannabis sativa]	1731722561
ICPEGSRQEQKNIDAAVVAAFDQHAEA	uncharacterized protein At1g21580 isoform X2 [Cannabis sativa]	1731669516
IDmYCKCGSVENARLVFDSIqDKDVVAWnSmI	pentatricopeptide repeat-containing protein ELI1, chloroplastic [Cannabis sativa]	1731671725
IDTRKENNmRKVGSYCSTRLGTqAINSLPETSRNRCGEDGSWDM	uncharacterized protein LOC115710013 isoform X3 [Cannabis sativa]	1731687144
IEALHAYPGGLQVGGGINSDNALSY	1-(5-phosphoribosyl)-5-[(5-phosphoribosylamino)methylideneamino] imidazole-4-carboxamide isomerase, chloroplastic [Cannabis sativa]	1731741638
IEDPSETGEVNNDSSNTVGGDRDPSIPnLPPSG	phosphatidate phosphatase PAH1 isoform X2 [Cannabis sativa]	1731730422
IEIPNKCSTVmESTKEGnGSILDqEAKYVn	transcription factor MYB28 [Cannabis sativa]	1731684576
IFARPFIGAMDGHmDAVSCMTKnPnHLKGIFSGSMDG	DDB1- and CUL4-associated factor 13 [Cannabis sativa]	1731742942
IFSYGKDqLNNETFALHSNSSSSSKTNNNN	histidine kinase CKI1 [Cannabis sativa]	1731724138
IGqVEGmmFDDVqLVVEI	uncharacterized protein LOC115706989 isoform X4 [Cannabis sativa]	1731680223
IHAEAVLKGTnVDGVYDCTSQDnNFTFEHI	LOW QUALITY PROTEIN: uncharacterized protein LOC115709908 [Cannabis sativa]	1731686876
IINFLNATnnAVVLGGGSGSnGGDHFMTGGTCFGTVEPMES	bZIP transcription factor 11 [Cannabis sativa]	1731730506
IKAHFSNGGCSDSLnLFFqmRVAGFVPnHFTLPMVV	pentatricopeptide repeat-containing protein At4g39952, mitochondrial [Cannabis sativa]	1731664888
IKATnnYDDSTIIGRGGFGTVYKG	putative wall-associated receptor kinase-like 16 [Cannabis sativa]	1731697123
IKGDYYNNNNLNNNNNNDFSLNPK	kinesin-related protein 12 [Cannabis sativa]	1731709731
IKGLLNEENIWCTNNNEMGn	uncharacterized protein LOC115723762 [Cannabis sativa]	1731668542
IKPSSSTqTSLTPSYTHADVTPSPPNSnFGHAPGISFGL	syndetin-like [Cannabis sativa]	1731744123
ILGSSHIGEGEDASLIKACERmmGVNISAAmnVESY	uncharacterized protein LOC115716025 [Cannabis sativa]	1731704597
ILNDETVHqLCKqAVAqARAGADVVSPSDmM	delta-aminolevulinic acid dehydratase, chloroplastic [Cannabis sativa]	1731665466
ILNRADPTDADGDLATASVSSDS	mitogen-activated protein kinase kinase kinase YODA [Cannabis sativa]	1731707847
ILSPDDPNNNTIMVNNNNnLNFS	ethylene-responsive transcription factor ERF086-like [Cannabis sativa]	1731743973
ILVPEWKRGLAIEEnKHCSATSLCHnCDTnGSImDYV	probable serine/threonine-protein kinase WNK9 [Cannabis sativa]	1731723491
IMEVmKmmRNGSSNNENEINIEDEDHDHVVNNNNYDVV	scarecrow-like protein 18 [Cannabis sativa]	1731729912
InALGRSHRVEEALLLYEEMQCRGICPDRYTYNS	pentatricopeptide repeat-containing protein At4g31850, chloroplastic [Cannabis sativa]	1731706062
InHEVESSSnIVLPQSm	truncated transcription factor CAULIFLOWER A [Cannabis sativa]	1731663236
IPDESGTIGIDqYGnLKISHnDGDPIVT	G-type lectin S-receptor-like serine/threonine-protein kinase CES101 [Cannabis sativa]	1731675878
IPDGSVqISPIKHSHNEDLqSSSPVDqLEAPETDGCAV	cyclin-dependent kinase G-2 isoform X2 [Cannabis sativa]	1731694879
IPEGGENIGSANMFGTEPL	indole-3-acetaldehyde oxidase [Cannabis sativa]	1731711795
IPGGTMPAnLGQAFKNHMSEM	plastidial pyruvate kinase 2 [Cannabis sativa]	1731705041
IPSFQDEQSEQLnFVKPAVDnSnNICTVESVIVGDS	intracellular protein transport protein USO1 [Cannabis sativa]	1731732101
IqGVGLAPGTENDTmYTLVLAVHALnnDTTVTDDMYV	subtilisin-like protease SBT2.2 isoform X2 [Cannabis sativa]	1731737508
IQKECVqSEVDSqPENNSRSGVPETEAEqP	protein IQ-DOMAIN 32 [Cannabis sativa]	1731670343
IqLSPGSLSPVmDFTTASPTPTGMTTSVn	BTB/POZ domain-containing protein At1g63850 [Cannabis sativa]	1731705201
IqPSDPPCSVCYQSLSISPDRNPnYRCnTSLMI	putative hydrolase C777.06c [Cannabis sativa]	1731739334
IRELEGQFqDAqKVIEH	paramyosin-like [Cannabis sativa]	1731688761
IRGDNDTNNTQNIAEMSPSPqSEILDDAGT	protein ROS1A isoform X4 [Cannabis sativa]	1731714235
ISESWKEMNNEDGNINSFFSNEFVqVCKnLGRASqFmY	(-)-limonene synthase, chloroplastic [Cannabis sativa]	2160020191
ISGEGLLPSDQVLVTGDDQTRQLVETYAqDTFAFFDDFQNS	peroxidase 40 isoform X2 [Cannabis sativa]	1731724281
ISGNASGADVEEVKSDTYSHnMTEAmGAVLTYRHELGMnYN	phosphoglucan phosphatase DSP4, amyloplastic [Cannabis sativa]	1731677824
ISVAGnSSVSSSSSnPMAGTGNTSVSSSS	glutamate receptor 3.5 [Cannabis sativa]	1731742199
ITEVnPKWEMEEMPIGRVMGDmI	aldehyde oxidase GLOX1 [Cannabis sativa]	1731701438
ITIDDAPETEADLTGDHTAKYSRGFGEnPIVSSSGImIPnYNA	uncharacterized protein LOC115695694 isoform X2 [Cannabis sativa]	1731733923
ITTLTFNDTNEnDAITnSLSDQFK	zinc finger A20 and AN1 domain-containing stress-associated protein 4-like [Cannabis sativa]	1731694587
IVGSGKAYELSqVSPGHCWKIFIDHAFNGDLESN	putative disease resistance protein At3g14460 [Cannabis sativa]	1731713548
IVIDQHTEnGEWWLKYGnNPIG	uncharacterized protein LOC115704518 [Cannabis sativa]	1731674289
IVnAGnGSGGFFTWDVLDK	uncharacterized protein LOC115714180 [Cannabis sativa]	1731695426
IVQQIQGNSGEDHRGSNASnDGKFE	general transcription factor 3C polypeptide 2 [Cannabis sativa]	1731718108
KAAGAFNPSIDFASPLDGDGHGSHTAAIAAGnNGIPVRMHG	subtilisin-like protease SBT2.5 isoform X2 [Cannabis sativa]	1731731195
KALDLFEqTRGKKDTVTWNSmmSGFVHNYQHE	pentatricopeptide repeat-containing protein At2g13600-like [Cannabis sativa]	1731734320
KAPFPPAPSDFPHSnGVLDSSGVn	ceramide kinase isoform X2 [Cannabis sativa]	1731677997
KASRPWDTTRDGFVMGEGAG	3-oxoacyl-[acyl-carrier-protein] synthase II, chloroplastic [Cannabis sativa]	1731680643
KDAWGSLDRnIKDHHHHHQNQQNNQmMMV	GATA zinc finger domain-containing protein 7 [Cannabis sativa]	1731720510
KDGFASLKRPKqEEESYFSQYKASTEEETSTT	protein LAZY 1 [Cannabis sativa]	1731742400
KDGKTAEFDLIDGGMAANNPSLIAFSE	patatin-like protein 1 [Cannabis sativa]	1731690710
KDPDHVVELCnEVVQEGHSV	helicase and polymerase-containing protein TEBICHI [Cannabis sativa]	1731722170
KEENKNESLDAATAPnIAATnIYESTTSSqLIEY	uncharacterized protein LOC115697166 isoform X2 [Cannabis sativa]	1731736676
KEnmESLTRSnTKGSRnGSFTAD	probable serine/threonine-protein kinase PBL25 [Cannabis sativa]	1731711678
KEVGGNGAFWGqYN	3-oxoacyl-[acyl-carrier-protein] synthase I, chloroplastic [Cannabis sativa]	1731703959
KEYEEKmKEKGEAPVmFSHLG	protein EARLY FLOWERING 5 isoform X1 [Cannabis sativa]	1731690448
KEYEVCENVKDYVFFDSDHPTEKANEqFA	GDSL esterase/lipase 1-like [Cannabis sativa]	1731682069
KGGGGGGSGGGGHGGSqGGERqRWRGHG	ctenidin-3-like [Cannabis sativa]	1731743643
KGNYSnGAGSGAGHGGRGGSGYYnGRISNGGNKYGN	uncharacterized protein LOC115716092 [Cannabis sativa]	1731704785
KIGLSSSDPSFnWnPMVAVGTSWHDQPNTMSSSVHSL	LOW QUALITY PROTEIN: dof zinc finger protein DOF1.4-like [Cannabis sativa]	1731737131
KIqAQSNTACVNPSPEGVnLMmYD	LOW QUALITY PROTEIN: uncharacterized protein LOC115715197 [Cannabis sativa]	1731697996
KKHVNVSALCPFCnLENESFNHVL	uncharacterized protein LOC115723703 [Cannabis sativa]	1731725366
KLNGEERNSIMGqINDACEnWGFFELVnH	1-aminocyclopropane-1-carboxylate oxidase [Cannabis sativa]	1731742104
KLNVnAASSSGCnKMGYGAIIRDTnGQ	uncharacterized protein LOC115711029 [Cannabis sativa]	1731689014
KLVTTmTGSISDSSSDLLSTnT	CRS2-associated factor 1, chloroplastic [Cannabis sativa]	1731676806
KMASNSInHAAnSAVKALERP	uncharacterized protein LOC115715917 isoform X2 [Cannabis sativa]	1731704335
KNGVLDLETGENGYFPmVLV	probable xyloglucan glycosyltransferase 12 [Cannabis sativa]	1731666865
KnLGIVQGLYNNE	uncharacterized protein LOC115696864 [Cannabis sativa]	1731735968
KNMNmGGSVqPAATIQRAEISCVYCGDGHTFENR	uncharacterized protein LOC115720334 [Cannabis sativa]	1731716704
KNqYLGIqEICDETSmFAYnLIGR	uncharacterized protein LOC115708011 isoform X2 [Cannabis sativa]	1731682843
KPLVVCCSTSDMGSAPDSmSLRHPQmSSmSPFGVTMnEGGVSRSSHK	uncharacterized protein LOC115714977 [Cannabis sativa]	1731697430
KPNVVVTDqDVAMME	protein FAR1-RELATED SEQUENCE 5-like [Cannabis sativa]	1731673721
KPQAqAPTPGAVFSSEMICEGTVERFV	mediator of RNA polymerase II transcription subunit 23 [Cannabis sativa]	1731695442
KQNEVTHnILVKWFCKEGNmDEA	pentatricopeptide repeat-containing protein At2g16880 [Cannabis sativa]	1731715188
KQREEAGGGGDAGGGGWFGWGGRFGWSnDD	uncharacterized protein LOC115707360 [Cannabis sativa]	1731681216
KQSSHSPSVGGSNAIICDTNnTSGSPHK	U-box domain-containing protein 35 isoform X2 [Cannabis sativa]	1731691439
KRASSSSLSCTTTTTDNNVIGEEmDSmVSTPnTQSLFKHnN	uncharacterized protein LOC115725384 isoform X2 [Cannabis sativa]	1731730939
KREMANqmSPPPPPNKECGRSSMEVGRLSLSSSP	protein abrupt [Cannabis sativa]	1731691904
KRGmFFmGDSVITSFKLqmYSYLKCLAD	putative F-box/LRR-repeat protein At4g15060 isoform X3 [Cannabis sativa]	1731685110
KRnQCSPGHSWIEVnGVInEFRVA	pentatricopeptide repeat-containing protein At5g66520 [Cannabis sativa]	1731684207
KRRETnRVGGVLAQSnINNNNNNmYCYYNSN	uncharacterized RNA-binding protein C660.15-like [Cannabis sativa]	1731743491
KRVPDLCFPLSPEKNAEGEQQMDLSGDnSN	transcription factor bHLH74 [Cannabis sativa]	1731666875
KSFMEAIDAIDnGINQYDIDQ	UPF0160 protein [Cannabis sativa]	1731706480
KSqEVGMRNDYNNNnGWSPKLEEEMREVSKIIE	probable F-box protein At4g22030 [Cannabis sativa]	1731675311
LAAEGmGYAQRAISIAQQEAEHLK	protein NPG1 [Cannabis sativa]	1731742539
LANGQVEEmKTLGSFFTWSnnH	uncharacterized protein LOC115702117 [Cannabis sativa]	1731662915
LASAIENKNNGDGLSEWEVKAHTC	mitogen-activated protein kinase kinase kinase 17-like [Cannabis sativa]	1731694049
LASCTFEEnTQWGKEmGVmYGCLVEDVLTGLVIQCRGWRSVYYNP	cellulose synthase-like protein E6 isoform X6 [Cannabis sativa]	1731680975
LASPQFGNmHYNQIVPQVNQNQH	uncharacterized protein LOC115704319 [Cannabis sativa]	1731673982
LATMGNFNNSFQqIHSqAQHS	WRKY transcription factor 44 [Cannabis sativa]	1731690027
LAVGGDmDSVAVQEFSRTLFNmRP	probable esterase D14L [Cannabis sativa]	1731740113
LDDVGTRSVKFqVRDmPCVVGSSGSSnCFLP	protein NLP8 [Cannabis sativa]	1731726529
LDQAKELLSEmSLNGVGADLqTHqDHC	pentatricopeptide repeat-containing protein At2g38420, mitochondrial [Cannabis sativa]	1731688372
LDQHQmAKLSDYGMSIISEGTEnFVAKGDn	probable inactive leucine-rich repeat receptor-like protein kinase At3g03770 [Cannabis sativa]	1731686414
LEDESIDAEILnSmAVTNEHFATALGTSNPS	cell division control protein 48 homolog D [Cannabis sativa]	1731686086
LEDSMAEKmLAREIKEGDSVIVDVDSD	ATP-dependent Clp protease ATP-binding subunit ClpA homolog CD4B, chloroplastic [Cannabis sativa]	1731676890
LEGGLqmLICqSCSSAIGAKFGVD	sugar carrier protein C [Cannabis sativa]	1731731020
LEGLKnCmKSGYSYLEGVEELLnALKNNNY	flavin mononucleotide hydrolase 1, chloroplatic [Cannabis sativa]	1731709635
LEGmMSKSWWSSGSnQKRGVSWSSW	uncharacterized protein LOC115709535 [Cannabis sativa]	1731685909
LEKALGDQFPEGERYFGLENFGnTCYCnSVLQALYF	ubiquitin carboxyl-terminal hydrolase 3 isoform X2 [Cannabis sativa]	1731695121
LEmnPFALVDGKPYPLDmRGELDDTA	ATP-citrate synthase alpha chain protein 1 [Cannabis sativa]	1731692526
LEMTEAYGEGnLLSKAEnFFYKnI	BTB/POZ domain-containing protein At3g44820 [Cannabis sativa]	1731745111
LEnIAALGIIYFmFmVG	cation/H(+) antiporter 15-like [Cannabis sativa]	1731712499
LEqIYLDSSGVSGEIPSTFA	probable LRR receptor-like serine/threonine-protein kinase At1g56140 isoform X4 [Cannabis sativa]	1731736662
LEQLERSLSmLEKSFGDFIqqLNQTGWDTN	protein root UVB sensitive 5 [Cannabis sativa]	1731738971
LESTLSVDEnEHLqVSTDFMDSAATKIVS	uncharacterized protein LOC115695084 [Cannabis sativa]	1731732843
LEWnGYPLESLGSnFTPQnIVYLS	disease resistance protein RPP2B isoform X2 [Cannabis sativa]	1731731877
LFLYSDTFDqGNKTYLSISNVSLGYnEKK	peptide-N4-(N-acetyl-beta-glucosaminyl)asparagine amidase A [Cannabis sativa]	1731737086
LGHAKVDEqQQQNLPDDSAVDSTAASSGIAKn	CCR4-NOT transcription complex subunit 3 isoform X4 [Cannabis sativa]	1731726356
LGHPYTWEmHRGEPNWMEIRLDRAMVnPSWnQVFPMASLYn	uncharacterized protein LOC115719779 [Cannabis sativa]	1731715319
LGKPWTTGLFDCYEnQTnAVMT	protein PLANT CADMIUM RESISTANCE 8-like [Cannabis sativa]	1731674101
LGMKPnEMSELFGEGWQTmRMNYYPPCPQPELVI	protein SRG1 isoform X2 [Cannabis sativa]	1731737719
LGSKPVnSAHDqKqSDHAPPLSVVS	uncharacterized protein LOC115716834 [Cannabis sativa]	1731706633
LHEnnQSLELVDPSLVEFDAKEAI	probable LRR receptor-like serine/threonine-protein kinase At1g56140 [Cannabis sativa]	1731736664
LHLqESEmDAAELLSNLEALYHGIHEnYEYSKDLPTYLqHCKDV	TATA box-binding protein-associated factor RNA polymerase I subunit B [Cannabis sativa]	1731712151
LHSFRTCPSmNHSKYFYFMNREQGQLYVYDICSTnRSDKHRT	uncharacterized protein LOC115695311 [Cannabis sativa]	1731733222
LILSNGMRVCYKCTDFLDDqVMFT	LOW QUALITY PROTEIN: zinc protease PQQL-like [Cannabis sativa]	1731676265
LISDIQSRGVGNKADQSm	DNA-directed RNA polymerase I subunit 1 [Cannabis sativa]	1731684047
LKAAIAASLMDSAPASSKSEAVASSqDENESS	ataxin-3 homolog [Cannabis sativa]	1731738355
LKEMDKmqIPPDEVTYNTLMqGRCRqGK	pentatricopeptide repeat-containing protein At2g15630, mitochondrial [Cannabis sativa]	1731672376
LLDMnGFCQLMLELEY	exocyst complex component SEC5A isoform X1 [Cannabis sativa]	1731672280
LLDRNMSPKVSDFGMARMFGQEqTqGNTIRIVGTYGYmAPEYAMEG	cysteine-rich receptor-like protein kinase 10 isoform X2 [Cannabis sativa]	1731681491
LLHFCNSGLqGADKSFKCPPNAPS	subtilisin-like protease SBT5.6 isoform X2 [Cannabis sativa]	1731737650
LLLAASNGSCTGLPSmNGPMDASTnAAVAMQRnQNQMFHQAV	light-inducible protein CPRF2 isoform X2 [Cannabis sativa]	1731695226
LLPVNYNGHVKnSMTSNNHHSMDLFT	CSC1-like protein At3g54510 isoform X1 [Cannabis sativa]	1731685455
LMLSGERLLAQPKPPAYCnSTYSSDVDYSS	G-type lectin S-receptor-like serine/threonine-protein kinase At4g27290 isoform X2 [Cannabis sativa]	1731712589
LmNmKYKGQGnVREY	uncharacterized protein LOC115695632 [Cannabis sativa]	1731733764
LnLDCDHYInNSKAAREAmCFLMDPQVGKRVCYVQFP	cellulose synthase A catalytic subunit 7 [UDP-forming] [Cannabis sativa]	1731730747
LNLSRIEEAASGAVQCQMIDMTYPGVVPmHKVnFDAKTEYDmIQN	microtubule-associated protein RP/EB family member 1B isoform X2 [Cannabis sativa]	1731684940
LnLWRKPIDDSVGLDqSmAWSCQmLDQIQ	uncharacterized protein LOC115714284 isoform X2 [Cannabis sativa]	1731695749
LNNCHEIEADVRTWQDNAEqISLEANTFLNPESHAR	disease resistance protein At4g27190-like [Cannabis sativa]	1731733722
LNPDSVAAVnHSEnLCIGVDQVVNSNSD	putative E3 ubiquitin-protein ligase LIN-1 isoform X2 [Cannabis sativa]	1731662961
LNqAICDNAERFnnEIGFIVRQYC	uncharacterized protein LOC115713154 [Cannabis sativa]	1731693520
LNRDEESQENTGHDDDFHTDDKQAWINATRWEPDPVEA	anaphase-promoting complex subunit 2 isoform X3 [Cannabis sativa]	1731741395
LnTEEVQSVnKPETITTTATTTSF	probable methyltransferase PMT27 [Cannabis sativa]	1731695876
LNVEEHARMFPWAmNLKqnnDSSGFKT	homeobox-leucine zipper protein HDG5-like [Cannabis sativa]	1731706750
LNYLnmSHNLLNNNLTNFPLS	receptor-like protein EIX2 [Cannabis sativa]	1731730981
LPELnTMMPSADIVAqmPFIDG	uncharacterized protein LOC115695407 [Cannabis sativa]	1731733374
LPGnnTMEKIDAHFSCRSNVIVRVSDPVQTYAEFm	LEAF RUST 10 DISEASE-RESISTANCE LOCUS RECEPTOR-LIKE PROTEIN KINASE-like 1.3 isoform X1 [Cannabis sativa]	1731724970
LPLNPYNNYNnY	uncharacterized protein LOC115704865 [Cannabis sativa]	1731674965
LPMMAqqqEIQPRTLQDYLHPTRT	uncharacterized protein LOC115717791 [Cannabis sativa]	1731708722
LPMVENCLSGYNSCMFAYGqTGSGKTYTmLGDIEnLEVKPS	kinesin-like protein KIN-12D isoform X2 [Cannabis sativa]	1731672416
LPQGTAINVGnFSGNLmN	ras-related protein Rab2BV-like [Cannabis sativa]	1731679898
LPqYYnSAVASGHAPHPYLWGPPQPmMPSFGTPYAAIY	common plant regulatory factor 1 isoform X2 [Cannabis sativa]	1731677471
LPSEYDSRVKAmEVDEKPTEDYn	26S proteasome regulatory subunit 6A homolog [Cannabis sativa]	1731712114
LPSWDDmmqSIEEFYRSRELAGIPKPNTHDIADFE	flavin-containing monooxygenase FMO GS-OX-like 9 [Cannabis sativa]	1731690034
LqEKLnGVYGELQnKME	uncharacterized protein LOC115724711 [Cannabis sativa]	1731728146
LQGNKLNGSIPnTMSTmnSLLEL	leucine-rich repeat receptor-like tyrosine-protein kinase PXC3 [Cannabis sativa]	1731744322
LqHDSGGEDqEMnTTLSYLVDVQPKLWLP	uncharacterized protein LOC115715092 [Cannabis sativa]	1731663663
LqNEIqDSMnELEEISPLYDSQIMKEKEITKGIM	structural maintenance of chromosomes protein 3 [Cannabis sativa]	1731715147
LQNGVSPHGmAGVqSRSTAGSYSLASPmGSSmSRSTTP	pumilio homolog 4 [Cannabis sativa]	1731672789
LRFILNDEEEqLCIRCYHNIYNSYQYIYTN	probable indole-3-pyruvate monooxygenase YUCCA10 [Cannabis sativa]	1731712907
LRSGFCVYDSRGFDYEqMSENIEELSSWMNEGVHHnqL	uncharacterized protein LOC115708017 [Cannabis sativa]	1731665540
LSDESNnQSGIYGCPnIDGSNGGSLAVDPSASSAILDEFSTFKN	auxin response factor 5 isoform X2 [Cannabis sativa]	1731670351
LSGITYGGmDNVLDPNSNEASRGYW	uncharacterized protein LOC115707745 isoform X3 [Cannabis sativa]	1731682139
LSLqSECEPmEATDDTKVEEDnEPIV	transcription factor MYBS3 [Cannabis sativa]	1731681667
LSNNNNNVRGSMAFNFPCIQqDQHA	ethylene-responsive transcription factor ERN1-like [Cannabis sativa]	1731743633
LSQRNMGMQRDHIIQMCqRFSPYG	uncharacterized protein LOC115700229 [Cannabis sativa]	1731743837
LSVLDLHRNnFnGEIPQDMFKn	receptor like protein 23-like [Cannabis sativa]	1731730124
LTAVQALQSQVDMPSm	uncharacterized protein LOC115717613 [Cannabis sativa]	1731708411
LTEqKNAAKEARENMEDAHNMVmR	MAR-binding filament-like protein 1-1 isoform X2 [Cannabis sativa]	1731675890
LTILSPLDSPNTDGITPDSCSnVRIEDCY	probable polygalacturonase [Cannabis sativa]	1731708309
LTmSCSSSSSKQRSCSGLqSEHSYLqLqSSNHCDLRRNDVKME	growth-regulating factor 1 isoform X3 [Cannabis sativa]	1731681545
LTQLPDLQSnNNNNNNSSDIFNLGF	protein indeterminate-domain 4, chloroplastic [Cannabis sativa]	1731724061
LVGHQFTWEKGRDSDnFIEEQWGGCTSnNIVD	uncharacterized protein LOC115696491 [Cannabis sativa]	1731735326
LVGSDPLmRQNPGTAnAMATKMYEER	transcriptional corepressor LEUNIG isoform X4 [Cannabis sativa]	1731670487
LVNRTPnGFMECSFCHYTCDSEVVRSFHLKITL	uncharacterized protein LOC115698770 isoform X2 [Cannabis sativa]	1731740293
LVPIELEDDHKKHDHHGNHLDIAHN	uncharacterized protein LOC115696288 [Cannabis sativa]	1731734983
LVqARVYMSmLNRECMDRGKAL	uncharacterized protein LOC115710496 [Cannabis sativa]	1731688185
LVYYNIFTQEMRDVCDMDRSILDSPVCSYVK	uncharacterized protein LOC115716943 [Cannabis sativa]	1731706905
LWKGQAMFHGAGAVAWENICqPK	uncharacterized protein LOC115710454 [Cannabis sativa]	1731688113
LWTPPATNNLKInVDAALYQQDn	uncharacterized protein LOC115710918 [Cannabis sativa]	1731688847
MAGEALISVNGNGNDSVSVNGnV	bifunctional dihydrofolate reductase-thymidylate synthase [Cannabis sativa]	1731679608
MATGnSTAPSRqLSQKEADIQmmLAA	40S ribosomal protein SA isoform X2 [Cannabis sativa]	1731685895
mCPSSQMVGDGISAVDSSGAYFVGNNSInnTSGGVAVI	transcription factor SPATULA isoform X3 [Cannabis sativa]	1731697440
mCVRmDqSERSYQLLGGYGAGQHLYK	uncharacterized protein LOC115716252 [Cannabis sativa]	1731705207
MDLLGDINEmNEEENLIEIDISMGSIKCTRFEI	uncharacterized protein LOC115724509 [Cannabis sativa]	1731727277
MDSIQKYLWPRLQTmDQQTLYQLHYH	protein ROS1A isoform X4 [Cannabis sativa]	1731714235
MGDVNNNNNNNNNNnnLIMmKALVVDDnVI	two-component response regulator 24-like [Cannabis sativa]	1731697958
mGIAYPPQPALGAmPPmYNSSVPVPPNAWPNPHRIqH	protein SUPPRESSOR OF FRI 4 [Cannabis sativa]	1731736652
MHNTGNPSGEFGYGSGHVNPVqAINPGLmY	subtilisin-like protease SBT4.6 [Cannabis sativa]	1731720137
MHTNnWAVLVCTSRFWFnYRHmAnTLSLYRT	putative GPI-anchor transamidase [Cannabis sativa]	1731715212
mILLPNFIVqSmYDNVYCGSImSLPSYNG	uncharacterized protein LOC115708141 [Cannabis sativa]	1731683187
MISYINERnQLMDQSVEYDWLPTKCTACDLLGHTVAnCSKDKG	uncharacterized protein LOC115713476 [Cannabis sativa]	1731694043
MKHNINnAQKKAAASHnSQVTSPA	uncharacterized protein LOC115696311 [Cannabis sativa]	1731735021
MLKHGRAGVPmEVmGLMLGEFVD	26S proteasome non-ATPase regulatory subunit 14 homolog [Cannabis sativa]	1731704779
mmATTTMEGASnGGILYHEVQESKLCAVHCVnTVLQGPFFSEFDLA	ataxin-3 homolog [Cannabis sativa]	1731738355
MMmTAVACKKAGLnFAGVHDSY	DNA-directed RNA polymerase 1, mitochondrial [Cannabis sativa]	1731741471
MMNGNNPHAqqmMNQNAQKGGNAGGnGKKGGSGGGGGPIPVQI	heavy metal-associated isoprenylated plant protein 33 [Cannabis sativa]	1731726314
MPIGGENLqPSSSnEVmAAWWSSYWAIq	uncharacterized protein LOC115703708 [Cannabis sativa]	1731672973
MQFADFGPKLGLNqTEETDEAqQLEENSMVDPVYFLKFPVLNDDN	transcription factor FAMA [Cannabis sativa]	1731722287
MRnnASDNSFSRSQALGPDEGAAAAA	probable receptor-like protein kinase At1g30570 [Cannabis sativa]	1731736745
mSNGNIYEPNASGLAASQPAMRPASSnVNGVSM	uncharacterized protein LOC115721135 [Cannabis sativa]	1731719333
mSnVLVCPLYWEGVCYWLGHDLDnYFYDFILSFnLS	putative F-box/LRR-repeat/kelch-repeat protein At1g11620 [Cannabis sativa]	1731707076
MSqMGQMGNIPVGQMGPIPAVQGLPAAAMNGAGAGY	heavy metal-associated isoprenylated plant protein 33 [Cannabis sativa]	1731726314
MVGHKRMGSmFGSGPPECCALSFEAIKAINLSKLECEGYSS	uncharacterized protein LOC115710611 [Cannabis sativa]	1731688362
MVGLqIEHEKQMMQMHAEACQNQMQILGLMARLLCQFFGSPnDGLG	stress response protein NST1 [Cannabis sativa]	1731713324
mYSDLAKMAWNFVNDWLSTTLCLQYK	cyclin-T1-3 isoform X2 [Cannabis sativa]	1731732109
mYTPRDHAGHGTHTLSTAGGGFVPGAnV	subtilisin-like protease SBT5.4 [Cannabis sativa]	1731727087
NANGGDSLETSNHSSQInnSSSGKPPRNLSLMRHCTSS	probable protein phosphatase 2C 47 [Cannabis sativa]	1731671032
NANLMNENGLNKLmKECQALQLKGCEDTTI	disease resistance protein At4g27190 [Cannabis sativa]	1731727654
NAQVLSEmEIPENYIEALPKNGRYC	rop guanine nucleotide exchange factor 12 [Cannabis sativa]	1731674997
nARLSEKYGIKPMVQASNNNNN	MADS-box protein SOC1 [Cannabis sativa]	1731680115
nATPGHnESKqDTGLLAGAH	GBF-interacting protein 1-like isoform X2 [Cannabis sativa]	1731744900
NAVMNAEnKMVDmEELmnIQCTSLGY	uncharacterized protein LOC115700532 isoform X3 [Cannabis sativa]	1731744336
NDKATFDHQSEAEDKEqIAYSHDYHKGNDEEEEEEEVKLIN	protein CHUP1, chloroplastic [Cannabis sativa]	1731741804
NDMQTQLnVPATTAGnSSPQDFQGFADPIDVKEPGGQTFDRLESASRTVKGA	serine/threonine-protein kinase TIO [Cannabis sativa]	1731678699
nDnHHHEAARSQQLSLWMSDQHDQTL	zinc finger protein MAGPIE-like [Cannabis sativa]	1731740453
NDYVFDKYYNGNGTNLFqEDqGGQHG	floral homeotic protein DEFICIENS-like [Cannabis sativa]	1731733618
nECnIEPMLEHYACIVDLYSRTGNLSmA	pentatricopeptide repeat-containing protein DOT4, chloroplastic [Cannabis sativa]	1731689778
NEGFVTFGDGnKGEImGqGDLDLSDVFP	uncharacterized protein LOC115713451 [Cannabis sativa]	1731694001
NENINLAEVDAnGNTAFFLACATGDIKmVEEFL	uncharacterized protein LOC115724011 [Cannabis sativa]	1731725896
nFSANVVVDGSIVNLGLWDTAGQEDY	rac-like GTP-binding protein RAC2 [Cannabis sativa]	1731738181
NGAEVNGNGNSCKqIqRFSDRGDDECPSA	mediator of RNA polymerase II transcription subunit 1 [Cannabis sativa]	1731669373
NGCmVKNESGITLLCHFLn	uncharacterized protein LOC115715105 isoform X4 [Cannabis sativa]	1731697765
NGGGPAmVDKGVDFANYFCTYAFLYHqKEmLCDRVRMDA	protein arginine N-methyltransferase PRMT10 [Cannabis sativa]	1731678277
NGHFHELQSIIDmLPMTSESTE	DEAD-box ATP-dependent RNA helicase 13 [Cannabis sativa]	1731722123
NGIKVKnKSHKGLSRFMNGSHNm	protein IQ-DOMAIN 1 [Cannabis sativa]	1731736914
NGITEDEFDYTGqAYEKDKPSqLNYKK	LOW QUALITY PROTEIN: kinesin-like protein KIN-13B [Cannabis sativa]	1731676424
nGKGPPTQEPYNAKTNNQP	protein argonaute 10 [Cannabis sativa]	1731721796
NGLDKALSDVIQFAVPPKGFFPSDSASASVHSLSSGGSDSVHGHmKAMQMDAF	PH, RCC1 and FYVE domains-containing protein 1 [Cannabis sativa]	1731710992
NGLDTKSGSEDIFMPKEqI	protein LNK1 isoform X2 [Cannabis sativa]	1731729478
NGSLENGFKLGNmSFGSPFTG	ninja-family protein mc410 [Cannabis sativa]	1731674632
NHIEKGInPASAnDLFLSGEHVGK	sulfate transporter 1.2 [Cannabis sativa]	1731720795
NHSVImYnnTMISFnMLEAARISGVKRFFYASSACIYPE	GDP-mannose 3,5-epimerase 1 [Cannabis sativa]	1731712257
nIGECWNGGGDGVATATIMLLGDTCTRGCRFCA	lipoyl synthase, chloroplastic [Cannabis sativa]	1731723678
NIGVSQPLNnLQGGVSMGQSVPAMSQGnLSGAQmVQS	mediator of RNA polymerase II transcription subunit 25 isoform X3 [Cannabis sativa]	1731741042
NINTTnTKIMHKmmCnSVDPAGAASGGGTGAP	uncharacterized protein LOC115714701 [Cannabis sativa]	1731696780
NISSSVIGLSGMDNGAGQTFGASFQ	protein BLISTER [Cannabis sativa]	1731721875
nKESSQGGnSKHESLGnEWL	uncharacterized protein LOC115706747 [Cannabis sativa]	1731679660
NKGHRCLQNITIHGnGRSVSAmVVDECDS	uncharacterized protein LOC115706534 [Cannabis sativa]	1731679145
NKISmVIYVAAMMVnFPFHFRTnASQHnMDVGDKC	methylesterase 18-like [Cannabis sativa]	1731711581
nKKAmSIqCKVCMqTFICTTTEVKCREHAEAKHPKS	uncharacterized protein At2g23090 [Cannabis sativa]	1731667156
NLDYATKVFDGLTDKDTVSWnTmIFAYAWCGKmEFAqKFFDVMPT	pentatricopeptide repeat-containing protein At3g02330, mitochondrial [Cannabis sativa]	1731746675
nLEqGLPVLSEWLF	outer envelope protein 80, chloroplastic [Cannabis sativa]	1731714481
NLGMFYKSKGnNNNNNGSSSSLEA	protein NPGR2 [Cannabis sativa]	1731692858
nLIVVGLLGSSESVEGVKLWKVRSDESMECEEMGEm	F-box/kelch-repeat protein At1g23390 [Cannabis sativa]	1731698285
nLKYAVEELLVCEnGNQNGGEGARLYDGTIEEIPES	translocase of chloroplast 159, chloroplastic [Cannabis sativa]	1731723934
NLPSSQPSFSPPNAPPSQPSFSPPnAPP	altered inheritance of mitochondria protein 3 [Cannabis sativa]	1731741244
NLVIQSGGGGGINVGSGSTSSS	protein LATERAL ROOT PRIMORDIUM 1 [Cannabis sativa]	1731704731
nLWYqPWIPWLSYEDFRELmE	uncharacterized protein LOC115713819 [Cannabis sativa]	1731694601
NmATWnIMIDGYARLGDVLSAELMFnQMP	pentatricopeptide repeat-containing protein At1g06143 [Cannabis sativa]	1731684490
NmEYFRYLDRPLTDNNmRANSGANSLQQSLPEDFGDLNNNLPFTQLL	transcriptional activator DEMETER isoform X2 [Cannabis sativa]	1731678005
nMIALnLEKLGNFLEGFGDEYFNSTSTAAVKEDQS	aluminum-activated malate transporter 2 [Cannabis sativa]	1731717794
NmSNPNQAqPSqTYPPQRKPSLEDTLQQFmQ	uncharacterized protein LOC115704200 [Cannabis sativa]	1731673783
NnFVDDLPSEVGTLSHLELLKLSDnS	probable leucine-rich repeat receptor-like protein kinase At5g63930 isoform X2 [Cannabis sativa]	1731718648
NNIPnPLPSnPANSRPTDPGYFED	mediator of RNA polymerase II transcription subunit 15a [Cannabis sativa]	1731683146
nnKKMREADSGMKQVFKYNICIC	uncharacterized protein LOC115712957 [Cannabis sativa]	1731693088
nnKLIELYEKAAAESnNKITADPQSAQEGIEmHNNDG	kinesin-like protein KIN-12E [Cannabis sativa]	1731713912
NNnAnGRGGRGHnNRGGNSGRGRGRGGRNSKPTCQVCGRYGHSAAFCY	uncharacterized protein LOC115702365 [Cannabis sativa]	1731670648
NNNNnnKAKYRIAAPSLEmGA	uncharacterized protein LOC115701015 [Cannabis sativa]	1731670192
NNQDSKASPSSPAVGYY	LOW QUALITY PROTEIN: DNA repair protein REV1-like [Cannabis sativa]	1731671946
NPEMGNGFRSVGDQSKDAYIEqMITIDESHKQVDF	uncharacterized protein LOC115711125 [Cannabis sativa]	1731689172
NPGGIPMQRGVNPQAHqqQQLRRKDPGMGM	cyclin-dependent kinase E-1 isoform X1 [Cannabis sativa]	1731692410
NPNAAPAVKDSSTQmKPDTAASPSSS	protein IQ-DOMAIN 1 [Cannabis sativa]	1731713921
NPQnLGFCDMnIQnNASNFNSLGIRKGSSPA	transcription factor bHLH49 [Cannabis sativa]	1731742425
nPSIDFASPLDGDGHGSHTAAIAAGnNGIPVRMHGHEFG	subtilisin-like protease SBT2.5 isoform X2 [Cannabis sativa]	1731731195
NPYHQQQQQqHqQQQYLAAVMNQQRAMAGND	heavy metal-associated isoprenylated plant protein 33 [Cannabis sativa]	1731726314
NqANDANTGVSRNRVGqISHSVVLGTFNVGDqGEGMV	ubiquitin-like domain-containing protein CIP73 isoform X2 [Cannabis sativa]	1731667268
NQAPAQPQLMPqqLQRY	auxin response factor 6 [Cannabis sativa]	1731742309
NqEGYSDLQAAVLKTKEAmE	uncharacterized protein LOC115715188 [Cannabis sativa]	1731667477
NQFGAQEPGSNEEIVEFACTRFKA	probable phospholipid hydroperoxide glutathione peroxidase isoform X2 [Cannabis sativa]	1731707998
NQKEKTPCSLPVASqqNqKETAGP	zinc finger HIT domain-containing protein 3-like [Cannabis sativa]	1731692648
nQKSSSRGKnRGKIASDGNSWTNEVDG	TNF receptor-associated factor homolog 1a [Cannabis sativa]	1731722500
NqKYLAVLDHNPHnDmALG	probable ubiquitin-like-specific protease 2B [Cannabis sativa]	1731667421
NqNLGTKnnSFHSDFLDEDPFCKFPTPKLHG	uncharacterized protein LOC115721261 isoform X3 [Cannabis sativa]	1731719748
nRSFGSDIALqSHSKAKH	histone deacetylase HDT1 [Cannabis sativa]	1731690294
nSGGSGLGLAICKRFVNLmDGSIWVDSDGLGKGCTAS	ethylene receptor [Cannabis sativa]	1731670544
NSLSPmFSTSANNLmPASLSPLVFHqqQHQQQQLVHS	scarecrow-like protein 22 [Cannabis sativa]	1731677499
NTAITTQPSFGSTNIEKP	aluminum-activated malate transporter 14 [Cannabis sativa]	1731705732
NVGGDHREKDFSGIGInIIGNDNSVTD	polygalacturonase QRT3 [Cannabis sativa]	1731691699
nVLLDKDFnAKISDFGLAKLnEDDNT	LOW QUALITY PROTEIN: probable LRR receptor-like serine/threonine-protein kinase At1g07650 [Cannabis sativa]	1731742082
NVNVGSCTTLAVSESDGGHKGFG	dirigent protein 17 [Cannabis sativa]	1731686637
nVTEKETHDSNGQSKLCTRGHWR	myb-like protein H [Cannabis sativa]	1731746757
NYFNGSSTEPQQHSnnLFHHVTTSQNP	ethylene-responsive transcription factor RAP2-3 [Cannabis sativa]	1731723905
NYSGCKPDFQQLCDHNGnKMmSmKDLPKT	G-type lectin S-receptor-like serine/threonine-protein kinase LECRK2 [Cannabis sativa]	1731717231
PAAPTnSDLKEFHDQmIE	UDP-glycosyltransferase 73C3 [Cannabis sativa]	1731690413
PAKSPDTLFKYISPEqVPIqYGGLSVDFCDCNPEFSI	patellin-3 [Cannabis sativa]	1731670564
PDASmHPVKSTKDVLELmHIGLmn	kinesin-like protein KIN-14J isoform X2 [Cannabis sativa]	1731704696
PDGRENDQTSY	serine/threonine-protein kinase VPS15 isoform X2 [Cannabis sativa]	1731675790
PDGSSGSNRGFVQYVRPDKHVSGSPYYSHYAEPFPYSnG	protein ENHANCED DISEASE RESISTANCE 4 [Cannabis sativa]	1731676589
PDKqCLVDLDDDSPLDEAKERCIISVCqPGSnLLAAGYCL	fructose-1,6-bisphosphatase, chloroplastic [Cannabis sativa]	1731724579
PDLVVFVMDSSIGqAAFDQAQAF	signal recognition particle 54 kDa protein 2 [Cannabis sativa]	1731682446
PDPDPAHSAPSmNLAAALAAERQFRQTNET	death-associated inhibitor of apoptosis 1-like [Cannabis sativa]	1731683525
PDVIREDNSAWRTDEEFGREmLAG	probable linoleate 9S-lipoxygenase 5 [Cannabis sativa]	1731726030
PEGmLSNEqGVYVAESVATKNMKQAKGRFRMYEDEDDAGNGISNH	protein ILITYHIA [Cannabis sativa]	1731714868
PEIqnILSDPVMRQVLIDFQEn	hsp70-Hsp90 organizing protein 3 [Cannabis sativa]	1731705279
PELGKLTnLFDLnVANNNLEGPIPENLSSCT	LRR receptor-like serine/threonine-protein kinase ERECTA [Cannabis sativa]	1731665076
PEPANESELKWqSADmPFSCGKFKSGATEK	uncharacterized protein LOC115723254 [Cannabis sativa]	1731724437
PEqVLEAqGVTAADIEGMLDELqEHVESI	hsp70 nucleotide exchange factor FES1 [Cannabis sativa]	1731738121
PGGGGGPmDGKNGGKKGGGGQNPAAGGKNGGKPqDGKNGGGGGG	heavy metal-associated isoprenylated plant protein 33 [Cannabis sativa]	1731726314
PGGIPqLqHGSSHGHSGVSnRG	probable NOT transcription complex subunit VIP2 isoform X2 [Cannabis sativa]	1731712413
PGINSmQPPEnTIPSPTAnVNTTSF	uncharacterized protein LOC115706412 [Cannabis sativa]	1731678829
PGQMPGqMPYmGYNIGPLDmPFGPGFVQQDPFGGQGCmYPVA	E3 ubiquitin ligase PARAQUAT TOLERANCE 3 isoform X2 [Cannabis sativa]	1731709363
PGSNMmFRGRPTqPGGVFPGGGFGMMMGPGRGP	30-kDa cleavage and polyadenylation specificity factor 30 [Cannabis sativa]	1731736755
PGVDTqGqSLDPRKIqDNFED	splicing factor U2af small subunit B [Cannabis sativa]	1731685513
PGVVSmANAGPNTnGSQFFI	photosynthetic NDH subunit of lumenal location 5, chloroplastic [Cannabis sativa]	1731695802
PHQDQYNTNNNNNSLFGQmPNYIINnNNVSSSTTTTTSTAGILS	WRKY transcription factor 71 [Cannabis sativa]	1731736566
PIQSWPNmGYQIPGMMLPMPGLGEqKVTqAVNLG	ADP-ribosylation factor GTPase-activating protein AGD5 isoform X2 [Cannabis sativa]	1731728920
PITDPVLEPRVqPGDSAPMLPVDIDNm	protein TSS [Cannabis sativa]	1731676627
PKLEAQEQNSSGTDGVVPVHSnKSSQSQPPMAnEQCYE	zinc finger protein CONSTANS-LIKE 4 [Cannabis sativa]	1731665421
PKmLNNGVVISAATGGTCSmFSTDWPSPPPSnCFSNETSSDQVVNDRSL	cyclin-dependent kinase inhibitor 7 isoform X2 [Cannabis sativa]	1731664245
PLAFAIVDSENDnSWNWFM	uncharacterized protein LOC115695314 [Cannabis sativa]	1731733228
PLIWSDDLRLqDLGTAASCLGEDqIQMALnSSTERGGSE	LOW QUALITY PROTEIN: myb family transcription factor APL-like [Cannabis sativa]	1731678038
PLLAKLVDQCGVCDTHYMVMVPqMTASESQVRPFD	uncharacterized protein LOC115720295 [Cannabis sativa]	1731716602
PLLEKTLDHSnPSISDPTIGFWNSTY	telomere-associated protein RIF1 [Cannabis sativa]	1731728567
PLnnKLnSSSmAGGGSLEAIGDHRSLSSEHGGL	BEACH domain-containing protein C2 [Cannabis sativa]	1731679420
PLQKAqALDPAGDAFNDQI	nuclear pore complex protein NUP155 [Cannabis sativa]	1731692528
PMAEELSPEGTTKDIDEVqPKENGWNKTQnmDnLTEKMGLLTSDG	heat shock factor protein HSF8 [Cannabis sativa]	1731705890
PMKRRGSTFTCNnKQDnRIFSCInH	uncharacterized protein LOC115695115 [Cannabis sativa]	1731732897
PMmYARPPPAVNYmPAPYPYPPPPQYQ	heavy metal-associated isoprenylated plant protein 33 [Cannabis sativa]	1731726314
PmSYGGPSGPSAPVDYSPYDqKPKTGKmGLGTGLAVGAVAG	leucine-rich repeat extensin-like protein 1 [Cannabis sativa]	1731736420
PnKSWLLnLCnCLFAVEGSEPVGLmLPNSF	uncharacterized protein LOC115714958 isoform X2 [Cannabis sativa]	1731697371
PNLqANDTTTTLDFqYNNqTTSTTS	LOW QUALITY PROTEIN: protease Do-like 9 [Cannabis sativa]	1731744371
PNRDGKGnPGKPAGVNFSGADEG	uncharacterized protein LOC115695159 [Cannabis sativa]	1731732975
PnSDESSQSPHPEGTEGKYLPSLDSTIEnCIGK	organic cation/carnitine transporter 3-like [Cannabis sativa]	1731683515
PnSNPADIGLPDGGGRYKLmGIVS	ubiquitin carboxyl-terminal hydrolase 14 [Cannabis sativa]	1731729018
PnSQQFTVQGIDYATQEIWLNDPNNC	putative RING-H2 finger protein ATL21B [Cannabis sativa]	1731704415
PNVVRLMKYDIENLCNYEMLGEnEIqLYMWmLDEQVHTn	uncharacterized protein LOC115706115 isoform X2 [Cannabis sativa]	1731678013
PQNQELWNSNPIISQVNmALFND	G-type lectin S-receptor-like serine/threonine-protein kinase LECRK3 [Cannabis sativa]	1731717245
PQQPPHLLGLQAPESSSWYYmAGPQYSPTLSSQSGGRSAYLS	zinc finger protein 6 [Cannabis sativa]	1731723746
PqQQQQQQQQQHGGGGDFNRGPPnPmMRQPSA	flowering time control protein FY isoform X2 [Cannabis sativa]	1731668640
PRPESGSHSqGGSAATTVNDTVS	uncharacterized protein LOC115700000 isoform X5 [Cannabis sativa]	1731669907
PRqGqPQAPSAGTFVQ	uncharacterized protein LOC115713563 [Cannabis sativa]	1731694182
PSGRSIFqVMGESKRKEEYFCFPEHFCA	zinc finger SWIM domain-containing protein 7-like [Cannabis sativa]	1731672060
PSKEFMqGEYAQALQENAmCALAnISGG	protein CELLULOSE SYNTHASE INTERACTIVE 1 [Cannabis sativa]	1731691410
PSLEGMFHNHNNqKKqNSDVESRMmFVP	pumilio homolog 12 isoform X2 [Cannabis sativa]	1731731966
PSNTTTSKSSVTILEEPASnFNGG	heat stress transcription factor B-4 [Cannabis sativa]	1731666706
PSqHHMSHILGNGSVSSSqPLTSHS	ataxin-2 homolog [Cannabis sativa]	1731689056
PSTYFGPPnqHqSLQPPLPFY	uncharacterized protein LOC115710497 [Cannabis sativa]	1731688187
PTWTLqSRmLMNGTSMASPSACGGVALLL	tripeptidyl-peptidase 2 [Cannabis sativa]	1731704066
PVASqQNLKETAGPLIQ	zinc finger HIT domain-containing protein 3 isoform X1 [Cannabis sativa]	1731691644
PVKDEYYVQPNISQnPnPAEEYFVLPSNNG	NAC domain-containing protein 53 [Cannabis sativa]	1731677736
PVSSIDMEDKKVAGKEESqSCGVVSDTVSENIDHqP	chromatin structure-remodeling complex protein SYD isoform X4 [Cannabis sativa]	1731724732
PVSWPVAPNnGImPFSHPnHYMYAGPLGYS	uncharacterized protein LOC115701375 [Cannabis sativa]	1731746373
PYPYAIFLCHHFGTETKVFqASLGGKNGnnVEAVAIC	BURP domain-containing protein 11-like [Cannabis sativa]	1731697196
QAAqAAAAAAAAAAIHVqqAQ	uncharacterized protein LOC115704669 [Cannabis sativa]	1731663393
QAGVVGLGIVAAmTDLTSSnSHGAEP	FCS-Like Zinc finger 14 [Cannabis sativa]	1731686068
QAHHQAQAQAQAQGVTHHq	myb family transcription factor EFM [Cannabis sativa]	1731681529
qAPPTPTTPSAAPPTnTqPPPTPVA	classical arabinogalactan protein 9 [Cannabis sativa]	1731672071
QASAPQFnSGLFnSTPPGQTNA	nuclear pore complex protein NUP98A isoform X4 [Cannabis sativa]	1731697950
QATGCYnLLCSGFIQInNEIAmGASIYPVSSAYK	uncharacterized protein LOC115725077 [Cannabis sativa]	1731729632
QDFTVSNFIDGDSWLPqTGVP	pectinesterase-like [Cannabis sativa]	1731744039
QDGQFTLGEnIFKGSGSDWTPKD	pathogenesis-related protein PR-1-like [Cannabis sativa]	1731732479
QDLDSAADALLSSGH	putative deoxyribonuclease TATDN1 [Cannabis sativa]	1731744157
QDPKLSSQLQnKSADTmGnKSAA	chromatin structure-remodeling complex protein SYD isoform X4 [Cannabis sativa]	1731724732
qDSEFWqLIAFCAGTGGSmLIIGSAAGVAFMGMERVDFF	sodium/proton antiporter 2-like [Cannabis sativa]	1731671923
qDSRWPTqVGTYVFREWEESSFHLGIDKRm	uncharacterized protein LOC115722274 isoform X2 [Cannabis sativa]	1731721968
QEHLALKELKDVSPTnCS	kinesin-like protein KIN-12D isoform X2 [Cannabis sativa]	1731672416
QEKEELnEDASKEKSmnDTFSKVmGREKHGSV	uncharacterized protein LOC115699169 [Cannabis sativa]	1731741400
QEKEVqANQGNNGSYGNPIDDHL	auxin response factor 19 [Cannabis sativa]	1731686064
QENSIRmPFMLDSnIAASGnKDGInWL	uncharacterized protein LOC115720122 isoform X2 [Cannabis sativa]	1731716164
QEPHKmFNGHqLHCQKAT	UBP1-associated protein 2A [Cannabis sativa]	1731695139
qERHqLPPLEEGFGPHVqIKNGGFLC	protein PLASTID MOVEMENT IMPAIRED 1-RELATED 1 [Cannabis sativa]	1731705728
QFmTGGCDRVKEARMHGVQTLFCI	transcription factor MYC3-like [Cannabis sativa]	1731709310
qGHVYGSGGFHqMTGNSSGGGGGLGPKSGPDHLSPTSNY	nuclear transcription factor Y subunit B-3 [Cannabis sativa]	1731732217
qGKEVEFFMKSTGELLNSqEmLLPGqNDYGRSSHQ	protein SPA1-RELATED 2 [Cannabis sativa]	1731721164
QGPSTTPSTTNIVQCNH	pentatricopeptide repeat-containing protein At4g02750 [Cannabis sativa]	1731713949
qGVGTqKmSTLQANFmNKAYPGSG	protein IQ-DOMAIN 14 [Cannabis sativa]	1731707757
qHERqKHYEDKnQELQQLKQLVSQYQ	uncharacterized protein LOC115707865 [Cannabis sativa]	1731682438
QIDVLGSGWDAESGISLPSSqGRIDTFWM	probable glucan 1,3-alpha-glucosidase [Cannabis sativa]	1731697700
qIPKAGGGGGGGAKARRmVDDDEDSEVEMLSISSGDD	exocyst complex component SEC5A isoform X2 [Cannabis sativa]	1731672282
QKFASSMAKYVqYqADNGAQAVQIFDSW	uroporphyrinogen decarboxylase [Cannabis sativa]	1731678084
QLEGLmnSLAnNNGGGGGGSSNLNVFGGFmNALG	protein indeterminate-domain 4, chloroplastic [Cannabis sativa]	1731724061
qLPLSYDFHNYmLRSMEEEFR	MLO-like protein 4 isoform X3 [Cannabis sativa]	1731671153
QLTNTDPSSGNCHYASAKSSSSMPPPSP	proteoglycan 4 [Cannabis sativa]	1731737737
qLVAELWEEnFKAEFVPKPDPSLTEQYEYASEH	eIF-2-alpha kinase GCN2 isoform X4 [Cannabis sativa]	1731723033
qMICQSVPHNNHTFPSLLKACSCL	pentatricopeptide repeat-containing protein At5g66520 [Cannabis sativa]	1731696071
QMIELVVDIqNCLqAFVGVAEDL	lipase [Cannabis sativa]	1731722868
QMLqEYLxGGEQTSFmYPSGVDRF	LOW QUALITY PROTEIN: mitogen-activated protein kinase 9-like [Cannabis sativa]	1731686333
QMLQmGPHSGQAqQFGGTLHNmQQPAAmGQLQPG	DEAD-box ATP-dependent RNA helicase 40 [Cannabis sativa]	1731737630
QNENNNnSPKTTTFRSISGAYVSAnTFTPLSTSLIDTYTDISGSnFESSTL	probable protein phosphatase 2C 4 [Cannabis sativa]	1731735933
QNIPPTPQLNqqPLTVVTAMEE	DELLA protein SLR1 [Cannabis sativa]	1731678193
QPnPVTARWESSDHLRDPKFQLDAF	acyl-coenzyme A oxidase 2, peroxisomal [Cannabis sativa]	1731692998
QPPMDIGTEPSLHVnEDDR	uncharacterized protein LOC115696468 [Cannabis sativa]	1731735290
QPQPQPPqqqNLL	putative clathrin assembly protein At2g01600 isoform X2 [Cannabis sativa]	1731692536
qPVADATqNNSDLVVSDTLSTEVSDKNKNFDNIGEVCLDAqICSDHPA	RING finger protein 10 [Cannabis sativa]	1731746667
qPWLPDSVNPYVSTTGPGLDGYmVSSL	uncharacterized protein LOC115713713 [Cannabis sativa]	1731694427
qQIYPEKLDDYSRKEnQYEIVWIPVMDnW	protein SIEVE ELEMENT OCCLUSION B isoform X2 [Cannabis sativa]	1731695714
QqLSMqYTPqMQQLSMQQTSQM	glutenin, low molecular weight subunit-like [Cannabis sativa]	1731732941
qqMVVLAIRGSTSLYSTEGKLCF	pentatricopeptide repeat-containing protein At1g76280 [Cannabis sativa]	1731677356
QQPSGSGAQNFPSGANSTQMLQMGPHSGQAqqFGGTLHNMqQPAAmGQL	DEAD-box ATP-dependent RNA helicase 40 [Cannabis sativa]	1731737630
qqqQQHSTPPTPN	NAC transcription factor 25 [Cannabis sativa]	1731738430
qqQQVTNGNQHLnPPPEQYQGQSGWTGRYF	protein SMG7 [Cannabis sativa]	1731712057
QRILGHFLAmDQITGGASPCSIDDGqLmGSPSm	BTB/POZ domain-containing protein At1g30440 [Cannabis sativa]	1731737180
qRmCEMLGTVEALDNSFYLGLPCIMGRnKnAIL	uncharacterized protein LOC115719079 [Cannabis sativa]	1731712405
QRNEADLmQVEEESSRDKRQGqINEVNSVREIEASILGDNLmqVEEE	uncharacterized protein LOC115706989 isoform X4 [Cannabis sativa]	1731680223
QRNNGnNTTTTTTSSPmNHmQLF	uncharacterized protein DDB_G0283357 [Cannabis sativa]	1731690782
QRqMVVDDqmNDVERYLLDDPVNPLTPSFDILLWWKD	uncharacterized protein LOC115696459 [Cannabis sativa]	1731735272
qSPKLAPqTPqPQP	polygalacturonase [Cannabis sativa]	1731692874
qYVqSTGLMSGVmPFGYGSNTLPP	regulation of nuclear pre-mRNA domain-containing protein 2 [Cannabis sativa]	1731746751
RAKSnSIQAAHQISHE	beta-amylase 3, chloroplastic [Cannabis sativa]	1731704821
RAPAPGWqTGQPGGMGFPT	probable ADP-ribosylation factor GTPase-activating protein AGD14 [Cannabis sativa]	1731675618
RDHLLqMTSYFQEAEnHGAVmDQTTLm	uncharacterized protein LOC115694930 [Cannabis sativa]	1731732589
RDHRAnFDqSLEVLMmAKDqAPAGTLTKTSIMLGCGE	lipoyl synthase, mitochondrial [Cannabis sativa]	1731742904
RDHVTTGASSDLqTATELAHYMVSNCGmSDIIGP	ATP-dependent zinc metalloprotease FTSH 11, chloroplastic/mitochondrial [Cannabis sativa]	1731704591
REHYACmVDVLGRCGKLEEAEELVRnm	pentatricopeptide repeat-containing protein At5g46460, mitochondrial isoform X3 [Cannabis sativa]	1731737658
REQMTHnTDWGnAGVGQSLYFSAG	uncharacterized protein LOC115698826 isoform X2 [Cannabis sativa]	1731669553
RETNANVESSRINECNmPFDLFRGSNKGTEAASIQSVPHqA	squamosa promoter-binding-like protein 14 isoform X2 [Cannabis sativa]	1731666533
RGCVIDFQGSWSRYLQLIEFSYnn	uncharacterized protein LOC115723737 [Cannabis sativa]	1731725425
RGFmqGYEKWIYHGEPEDAVVDVAVADVESEDEMIPILEDFFP	uncharacterized protein LOC115719962 [Cannabis sativa]	1731715769
RGMQnAGFEPDKVTYSIVmEVLGHCGFLEEAEDMFnEMRQRNWVP	pentatricopeptide repeat-containing protein At1g18900 [Cannabis sativa]	1731685782
RHMDHENVVSVKDIIRPPqREnFn	mitogen-activated protein kinase homolog MMK2 [Cannabis sativa]	1731678860
RINDENGnAPLFnSGqIGH	probable rhamnogalacturonate lyase B [Cannabis sativa]	1731669263
RIqDHLRPnGAHRWHnYmKTPHE	glycosyltransferase-like At2g41451 [Cannabis sativa]	1731686259
RIRTQEEENGGRGGnSEFT	presenilin-like protein At1g08700 [Cannabis sativa]	1731724493
RISEmKEVINQmKnDSCECKDSVFVAAMKTYA	LOW QUALITY PROTEIN: pentatricopeptide repeat-containing protein At1g05600-like [Cannabis sativa]	1731710264
RISKEKELEALLAGEQDPCSCYmEVqAGAGGTESMDWAAMVM	peptide chain release factor PrfB2, chloroplastic [Cannabis sativa]	1731714284
RKAAEAAASMLSGGNnGKFmERTGSLDSSFSPGGGK	interactor of constitutive active ROPs 3 [Cannabis sativa]	1731713401
RKGNGGELDqSTSSTTTNTT	zinc finger protein ZAT10-like [Cannabis sativa]	1731667138
RKmKDEEGFFYPHnVDFRGRAYPm	DNA-directed RNA polymerase 2, chloroplastic/mitochondrial isoform X2 [Cannabis sativa]	1731742990
RKMVESAKECMKqKASnSEIYGKmQAVFI	boron transporter 4 [Cannabis sativa]	1731675900
RLTDLILWDnELSGPIPEE	probable leucine-rich repeat receptor-like protein kinase At5g63930 [Cannabis sativa]	1731722677
RmGmNGInSSSqKGKVVQSSKTSS	DNA topoisomerase 1 alpha [Cannabis sativa]	1731697698
RNANGHVKAALSmPmLDNLKSHEmEA	uncharacterized protein LOC115720373 [Cannabis sativa]	1731716800
RnCLVnASASLLNCAPASEGRAmFAGCYVRYSTDRFFH	cysteine-rich receptor-like protein kinase 42 isoform X2 [Cannabis sativa]	1731684998
RNCPQKALFMYKSmLEENmGPDYYTYPLLVHACAV	pentatricopeptide repeat-containing protein At1g08070, chloroplastic [Cannabis sativa]	1731719971
RNGIGGSGGGGGGSSSSGFRIRIPT	trihelix transcription factor ASIL2 [Cannabis sativa]	1731666040
RnPGMEnLPAnNPNMNIDYGK	uncharacterized protein LOC115696261 [Cannabis sativa]	1731734937
RNPqELLSLSLSSSSSTQ	MDIS1-interacting receptor like kinase 2 [Cannabis sativa]	1731739654
RNVSPASQSPGLSGSSNSAVGmSESSSVTIQ	uncharacterized protein LOC115709108 [Cannabis sativa]	1731684911
RPGSSSFNYENLNLLSLDENPFAAq	probable phosphoinositide phosphatase SAC9 [Cannabis sativa]	1731682955
RPqPKPMVEVPYHGFDNRTENGATEEKKP	protein TRAUCO [Cannabis sativa]	1731714931
RQENDKLRAENNMIKDAmSnPMCNQC	homeobox-leucine zipper protein ANTHOCYANINLESS 2 isoform X3 [Cannabis sativa]	1731706241
RQGSPRVERSnSQAQQGTKSNE	protein IQ-DOMAIN 32 [Cannabis sativa]	1731670343
RQLLKTEEFHDQqqHHDHqAELDSFAE	transcription factor MYB15 [Cannabis sativa]	1731675136
RQMRTGWADGPEFVTqCPIRPGGSYTYRFTIqGQEGTLWWHAHSSWL	LOW QUALITY PROTEIN: laccase-12-like [Cannabis sativa]	1731680176
RQNGSSHSDSIVAEDEEAAELFLNKVNSPGVCHN	delta-1-pyrroline-5-carboxylate synthase [Cannabis sativa]	1731738027
RQNLQGTDGGCSETAAIGVGGSSEGYETVDL	uncharacterized protein LOC115717129 [Cannabis sativa]	1731707370
RRCmRYESQVAELLHRDSAY	protein RST1 [Cannabis sativa]	1731744312
RRKHALmnDMEKTLDDAnIQMDQDQILVEVL	ubiquitin carboxyl-terminal hydrolase 5 isoform X5 [Cannabis sativa]	1731740419
RSLARSSSMYMKRnTEHDPPYWRGPIWmNmNYmILS	mannosyl-oligosaccharide glucosidase GCS1 isoform X2 [Cannabis sativa]	1731692772
RSLDWInVMSYD	class V chitinase [Cannabis sativa]	1731728686
RSNGVINAGYICFQTmHq	GPI mannosyltransferase 2 isoform X2 [Cannabis sativa]	1731726247
RSSLDDNVPDPSSPSSGRNGR	ycf20-like protein isoform X2 [Cannabis sativa]	1731705771
RSTFAmGYQQELLLNNAHQIPFSS	putative two-component response regulator ARR21 [Cannabis sativa]	1731708377
RTFKSDSFMGnTLCGGPLGLCPGDSnGSSPLPNG	probable inactive receptor kinase At1g48480 [Cannabis sativa]	1731685179
RYCLSGSSDSMIRLWDLGQQRCVHS	WD repeat-containing protein 48 isoform X2 [Cannabis sativa]	1731712076
RYGDRDRFDGRESRYESqDRYVSDRYSERYAPARDTFVDRELQn	glycine-rich RNA-binding protein RZ1B [Cannabis sativa]	1731685189
SCSnGALnFSSAPSQRSSRPASQHKnTVFTSSTSG	uncharacterized protein LOC115707380 [Cannabis sativa]	1731681280
SDDEIWLAVIMKLmDYYISS	protein PRD1 isoform X2 [Cannabis sativa]	1731723736
SDFDVLRnFSSSLSGHKSIDLSSS	U-box domain-containing protein 35 [Cannabis sativa]	1731685887
SDHSQPISnSTSKFQEDNVARHAEQS	uncharacterized protein LOC115699086 isoform X2 [Cannabis sativa]	1731741110
SDPVEAIAEIKqqSQGGEENIDVDATIASH	eisosome protein SEG2-like [Cannabis sativa]	1731673797
SDYFPqLmEMAEKLIREGKAYVD	glutamate--tRNA ligase, cytoplasmic [Cannabis sativa]	1731711793
SDYYSTEISSIPLLALQVTYFGCGGVCLSVGGAHVVmDGnSAFnFVnAW	shikimate O-hydroxycinnamoyltransferase [Cannabis sativa]	1731673022
SEKRmERMASKMqRqGGIAPTHSTGLSqPHMSK	uncharacterized protein LOC115705173 [Cannabis sativa]	1731675647
SFqDLLSmAEQEFGYDHPmGGLTIPCSEDI	auxin-induced protein 15A-like [Cannabis sativa]	1731718857
SFSYHRHSRTAnPPLELQTIGM	uncharacterized protein LOC115697855 isoform X3 [Cannabis sativa]	1731669328
SFYGSGGSVTVPSEFSGCNSVGnWPSPAVVNED	protein CUP-SHAPED COTYLEDON 2 [Cannabis sativa]	1731736622
SGDSmLMEGVIGGVNGGRSFGVNTNSGNSTINVDn	uncharacterized protein LOC115719805 [Cannabis sativa]	1731715389
SGKGDnAGGGKKKGGGGGGDGGqnVEAEGGMVm	heavy metal-associated isoprenylated plant protein 3 [Cannabis sativa]	1731718058
SGLTENLGNFHGnVESDKCKCRHEnSDnIANI	uncharacterized protein LOC115710065 [Cannabis sativa]	1731687289
SGNKFTGVLSEnMTCSSGLnFVnmSSNYLVGKLPS	probable inactive leucine-rich repeat receptor-like protein kinase At3g03770 [Cannabis sativa]	1731683096
SGNNDPSKCGCNQVTKTNHISmLmQVLIEKNNQVLSLKNSSGVWVDWDn	uncharacterized protein LOC115704000 [Cannabis sativa]	1731673464
SGPAnSSGTAnTAGPSPSSAPSTPSTHTPGDV	transcriptional corepressor LEUNIG isoform X4 [Cannabis sativa]	1731670487
SHCGWNSCVESLSmGVPIVAWPMQSDQPFnGLLI	zeatin O-glucosyltransferase [Cannabis sativa]	1731689122
SHEIMYAGNKLSEQKNEDEQGDSHNILA	uncharacterized protein LOC115699059 [Cannabis sativa]	1731669601
SIGnSTSSNRSSLSSSSDLVDDASSS	uncharacterized protein LOC115707549 [Cannabis sativa]	1731681705
SIHSVVmASNNNnQEPnSnPNTNTNKKETEDEASHVSHPMG	uncharacterized protein LOC115702427 [Cannabis sativa]	1731670758
SIKPELGNKDSSSTGTSDACGSGNmASGGKqEPVRP	CBL-interacting serine/threonine-protein kinase 10 [Cannabis sativa]	1731720070
SIPNCIGDFTSMKQnEGLnTVHVRTKTYAFKNTMTNYGEQ	receptor-like protein EIX2 [Cannabis sativa]	1731720864
SKIAYRDMNEVSIFNSNSYDYSTPSEHNMKqHSqTGKIGSARAHn	transcriptional activator DEMETER isoform X2 [Cannabis sativa]	1731678005
SKSYTLqLALASASASDLqVRmNE	rhamnogalacturonate lyase B-like [Cannabis sativa]	1731689012
SLAEINMEKDAKqFqmNQSNVGEVKTnGIDGVEIR	uncharacterized protein LOC115714816 [Cannabis sativa]	1731697087
SLGGFGFASNCSPLESSSPSNQTEQQKESSNIVKLnGDAQmLWWSm	protein REVEILLE 7 isoform X2 [Cannabis sativa]	1731695702
SLmCELSTSSDETKSDAnnSAQEVQnNDESVETTSRET	trafficking protein particle complex subunit 8 isoform X3 [Cannabis sativa]	1731740615
SLVQTSSSSSSSWLSFSSNYYFHIPT	uncharacterized protein LOC115695886 [Cannabis sativa]	1731734386
SmGSSSVVGVPAGKnnmSGVVTGFPVWS	BON1-associated protein 2 [Cannabis sativa]	1731675313
SNAHnRPTRGDVGIQGQKCDLLDWTGSGnIVAVGY	uncharacterized protein LOC115696811 [Cannabis sativa]	1731735858
SNDNLADANAnIDQnSYMTmPTFGSPAIVVKG	piriformospora indica-insensitive protein 2 [Cannabis sativa]	1731741834
SnnAFQFCGQPSSIPGSVLQLmGSTY	anaphase-promoting complex subunit 5 [Cannabis sativa]	1731669628
SNQKGPVVKGnQHATFnLAFRmSTVGCIQLQDEATLTLKCFEKCGDGGGFEEIFM	nucleolar protein 6 [Cannabis sativa]	1731722671
SPAGASAGGTGDHNLQMMMGLGLSSQAmDWNQAALF	transcription factor bHLH123 isoform X3 [Cannabis sativa]	1731733987
SPASSAMVVGEGEMnNLSmVSGQRNPASmPTPIQHLAP	uncharacterized protein LOC115715032 isoform X2 [Cannabis sativa]	1731697568
SPLnFHQVnGGGGAGFGGGIQEnYPN	protein PLANT CADMIUM RESISTANCE 6 [Cannabis sativa]	1731687870
SPQVGTPGMImGKPVmDLSMYAQ	nuclear transcription factor Y subunit C-9 [Cannabis sativa]	1731719864
SPSAVGGGGVmSPTLSLQGSFnNNI	LOB domain-containing protein 12-like [Cannabis sativa]	1731738763
SPSnFVnVGTWGLSNTGDFWDY	probable leucine-rich repeat receptor-like serine/threonine-protein kinase At3g14840 isoform X2 [Cannabis sativa]	1731737010
SPSPPQLSTPPMTYPVGPVPPPPPSSSGPNNG	leucine-rich repeat extensin-like protein 3 [Cannabis sativa]	1731744187
SPSPTFQRGGGSGGGGGGRGGRGGGGRSGGGGYASTTPIPqP	protein argonaute 5-like [Cannabis sativa]	1731744125
SPSRTQVPAPETPKSEPPPTNIPSS	pollen-specific leucine-rich repeat extensin-like protein 1 [Cannabis sativa]	1731672405
SPYPGqDSLQRIIVFGDmGKAERDGSnDYGnTQPG	nucleotide pyrophosphatase/phosphodiesterase-like [Cannabis sativa]	1731685202
SRVPAQSESTQGPVDHDHqPPTV	RING-H2 finger protein ATL5-like [Cannabis sativa]	1731673195
SSPTPTHLKNYNLCLLDQFYPEFHCGI	salutaridinol 7-O-acetyltransferase [Cannabis sativa]	1731686060
SSQQGNqILQmNNLRNPME	uncharacterized protein LOC115719910 [Cannabis sativa]	1731715637
SSSSAYYSDIPPmAALSGGKGFICGILAn	serine/threonine-protein kinase-like protein CCR1 [Cannabis sativa]	1731686288
SSTNGGGKYIGNPIMSVTNWMNLSFEGIDFG	spermidine hydroxycinnamoyl transferase-like [Cannabis sativa]	1731705888
STANHPPTPVEVAIAnEGSqSASGCSSSPLHGTISSA	WD repeat-containing protein 44 isoform X2 [Cannabis sativa]	1731678318
STFTGVSPSSTTqnHVYRPFq	uncharacterized protein LOC115695694 isoform X2 [Cannabis sativa]	1731733923
STPGGQPMTPnSASYLPGTPGGQPmTPGTGGLDAm	putative transcription elongation factor SPT5 homolog 1 [Cannabis sativa]	1731666222
STQLEHnSGPSSNAYGYGGSPPVESSNLSTH	uncharacterized protein LOC115716058 isoform X4 [Cannabis sativa]	1731704690
SVFRPQEESTQnEmIYGSPRPSRSTnHPFEQSPANGWSKN	uncharacterized protein LOC115696862 [Cannabis sativa]	1731735964
SVGGPLSQPGFVNNmPVQGPSqTF	regulator of nonsense transcripts 1 homolog [Cannabis sativa]	1731707340
SVGPNTFTAVENIQEAIQQKYL	loganic acid O-methyltransferase-like [Cannabis sativa]	1731716426
SVmSFSPNTTqAAKTFFHqTLGm	uncharacterized protein LOC115718070 [Cannabis sativa]	1731709194
SVPEQNWGNPNSNSTPFLVFHGQIPGLAFSnGSSGSGH	probable E3 ubiquitin-protein ligase RHC1A [Cannabis sativa]	1731713117
SVPNDqVESSTVAARSQDHNQKnD	myb family transcription factor PHL13 isoform X2 [Cannabis sativa]	1731712704
SVPqqKFTYPTmSQTIPASTSIGGSLGASQGSGMMS	transcriptional repressor ILP1 isoform X2 [Cannabis sativa]	1731682635
SVPSLRRMnqPSIGIYRSGFC	3-oxoacyl-[acyl-carrier-protein] synthase 3 A, chloroplastic [Cannabis sativa]	1731707324
SVqPEVLQSSnGSGH	uncharacterized protein LOC115721948 isoform X2 [Cannabis sativa]	1731721172
SVRYEKNLFYGSPNNAPPPSPE	putative receptor-like protein kinase At4g00960 isoform X2 [Cannabis sativa]	1731681467
SVSGGGGGGAGDVLPRHQNQTnnPQSIIGSGLMm	dof zinc finger protein PBF [Cannabis sativa]	1731737141
SWPDLDmLPLGWLTDPGSNnGPHRKCnLn	uncharacterized protein LOC115714929 isoform X3 [Cannabis sativa]	1731697310
SYAGLFSKVAPLnTSmnn	uncharacterized protein LOC115714144 isoform X4 [Cannabis sativa]	1731695342
SYAVNNTIKPPSSqDqL	protein MICRORCHIDIA 2 isoform X2 [Cannabis sativa]	1731692747
SYIMALTESqNVGTQNVERNFGVCVVDVATSRVI	DNA mismatch repair protein MSH6 [Cannabis sativa]	1731663409
SYKDPAGCAARnVHGFTLDDIQKm	uncharacterized protein LOC115709098 isoform X2 [Cannabis sativa]	1731684895
SYTPmKSTTTENKGKCPQnnnHRNSENLCSRCGIKGH	uncharacterized protein LOC115695209 [Cannabis sativa]	1731733054
TAqATSDSLSNPASGSSSRAAAVRGSDSTDHRSGSSYG	E3 ubiquitin-protein ligase UPL3 [Cannabis sativa]	1731664740
TDAFKmAWDTACqSDSATVILVPNGLSFMIqSSIFTG	polygalacturonase At1g48100 [Cannabis sativa]	1731665576
TDAKSRTPEmGWSHLqKNLNNEWESNTADSSLTKTGAKWESNED	uncharacterized protein LOC115700657 [Cannabis sativa]	1731670106
TDPSNqRVRYCRKCnqLKPPRCHHCSVC	probable protein S-acyltransferase 14 [Cannabis sativa]	1731678584
TDSSPAKSSRDDNNATAVRSTNSSPSTLSnYA	uncharacterized protein LOC115714119 [Cannabis sativa]	1731695268
TELHISNNNISGKIHPMFCS	receptor-like protein 35 [Cannabis sativa]	1731694623
TGNNmEVVEIGGGEVEDVmTAEKMAEVAIRVLCAGMSV	nitrate regulatory gene2 protein [Cannabis sativa]	1731729006
THANHERRAEEVAREYAQEqEFFRqAAMVSK	uncharacterized zinc finger CCHC domain-containing protein At4g19190 [Cannabis sativa]	1731737879
THKNFIASSLmVTmEqDLVGEMDNVFLC	4-coumarate--CoA ligase-like 7 isoform X2 [Cannabis sativa]	1731741276
TLAFNYPAGEHNVFKVNGTDF	mavicyanin-like [Cannabis sativa]	1731708982
TmPLDGSDEKFEEVLDPDFGESAIGRVA	alkaline/neutral invertase A, mitochondrial [Cannabis sativa]	1731724812
TNNTAPPNQTMVWnNMIMESYDNNAK	uncharacterized protein LOC115718444 [Cannabis sativa]	1731667811
TPNGTSEEERFqASNNmINLLYSVTDLEYKTICLF	separase isoform X1 [Cannabis sativa]	1731721289
TPQPQPKQTTTPQPqPqPMPqPQP	polygalacturonase [Cannabis sativa]	1731692874
TPQQNIDYIYTnRTSDLSYVTTSnGPLTF	glucan 1,3-beta-glucosidase A [Cannabis sativa]	1731670399
TPSQILIGPTQFSCPVCYKTFnRYNNmQmHMWGHGSQYRKGPESLRG	zinc finger protein WIP2 [Cannabis sativa]	1731683955
TPVEnYVPnHETQEARmVENAVCVVPEPGSPNL	binding partner of ACD11 1 isoform X2 [Cannabis sativa]	1731723807
TQPASSEKVPGEKGNNTNnFSEKHSDDGFLLSSD	protein SABRE isoform X2 [Cannabis sativa]	1731731361
TRnHEGEVAWVRTAKLDFSDAL	uncharacterized protein LOC115715237 [Cannabis sativa]	1731667479
TSGARKDGSSAGDHGTRQTEVGEGGSTGGQAGGGSGGGYGGETGGQAGGGSG	glycine-rich cell wall structural protein-like [Cannabis sativa]	1731708730
TSGHQmSQPmGqqPPQSQGSQMAGPPQTQ	DEAD-box ATP-dependent RNA helicase 40 [Cannabis sativa]	1731737630
TSILCDPWLPHNTnDYVISSHPGLVnq	uncharacterized protein LOC115700120 [Cannabis sativa]	1731743659
TSnmKFALnGCLIIGTLDGAnVEIREEVGEDNFFLFGATADE	alpha-glucan phosphorylase, H isozyme [Cannabis sativa]	1731711913
TSNSHHHqISSSSIPEPHFINNSNSNLPFPTLnTTTTT	trihelix transcription factor PTL [Cannabis sativa]	1731687179
TSQGEGDHRANADQSGEQEmRIEVDEPIATDAqVDLGMDFM	E3 ubiquitin-protein ligase UPL1 isoform X3 [Cannabis sativa]	1731734247
TSSDFSADSSqKSISIGNASnKDLKTSSGKFSISLSm	formin-like protein 3 [Cannabis sativa]	1731736601
TSSLEWIInHCFSLqDVSS	filament-like plant protein 7 isoform X2 [Cannabis sativa]	1731671229
TSSTYSTISMATnSLKNDPNLSMmKLSLTSTSNDIEVY	LOW QUALITY PROTEIN: uncharacterized protein LOC115714599 [Cannabis sativa]	1731696529
TSTQVRSQESQSRPQGnSIPITTIDVEAIDDDVI	E3 ubiquitin-protein ligase RNF4 [Cannabis sativa]	1731696822
TTFDFMASILKDLVqEGMIEESEVDSFNmPLYN	loganic acid O-methyltransferase [Cannabis sativa]	1731720839
TTKFAGVLSQEDEVENSRVKPqmAVmDD	LOW QUALITY PROTEIN: WEB family protein At2g40480 [Cannabis sativa]	1731675345
TTPTTEKKLANNFVDSmTKNVNPInESm	uncharacterized protein LOC115696577 [Cannabis sativa]	1731735462
TTSSTAELHRFTTLDSSKWnLInnKQTTF	WRKY transcription factor 72A [Cannabis sativa]	1731685016
TTTTqFGSDLTSNNNNNNNMSSSLGTKTSSPIQFC	protein FEZ [Cannabis sativa]	1731740136
TVDHDKCRIqFDHPDIGVEFVmD	protein ALWAYS EARLY 2 isoform X5 [Cannabis sativa]	1731711934
TYTEKmYLHSnKLTGSIPPELGNmT	LRR receptor-like serine/threonine-protein kinase ERECTA [Cannabis sativa]	1731665076
VAEPSSILNKSAEEPSNSLMSAVEGnSKGADSS	protein SPP41 isoform X3 [Cannabis sativa]	1731675283
VAESGARFKRTENNNNNSNNNS	probable inactive serine/threonine-protein kinase scy2 [Cannabis sativa]	1731743881
VALNNHGGGGGGGLYALMQGNHRGKDSCNnnSSLHKTTS	LOW QUALITY PROTEIN: protein OBERON 3-like [Cannabis sativa]	1731721868
VARqCPKANILGERGGGGGGGGGGGGGGRSSGYRDIVCRNCqQLG	zinc finger protein GIS2 [Cannabis sativa]	1731730685
VARVEEEDIFVGEGVEYDIPGKDGSQSPLSE	suppressor of mec-8 and unc-52 protein homolog 2 [Cannabis sativa]	1731676595
VDDRSWDVSLVQDmFnVRDAnLILGIPLSFSATnDHWAW	uncharacterized protein LOC115704315 [Cannabis sativa]	1731673976
VDDVQGGADQGVVDGmVLISH	uncharacterized protein LOC115710409 [Cannabis sativa]	1731688041
VDFGNVAVLSqQNKQILIDAVVHAVnEDYAEmAnD	protein ACTIVITY OF BC1 COMPLEX KINASE 1, chloroplastic [Cannabis sativa]	1731669199
VDVTGPNEGPVQGTRGGSGGGGGRGGSRGGYGGGGRGG	cold shock domain-containing protein 4 [Cannabis sativa]	1731745024
VEAFNmFqRMNSDGVMPDEVSLASILSACAnVQALnQG	pentatricopeptide repeat-containing protein At3g09040, mitochondrial [Cannabis sativa]	1731735916
VEEADPLSVGTHHCHASTSSSGKVPPSP	dicer-like protein 4 isoform X1 [Cannabis sativa]	1731729601
VGLVNEVNqKLmESINGSGGIYmTHS	tyrosine/DOPA decarboxylase 1 [Cannabis sativa]	1731721007
VGNEVFNLNDTqLMSSLYPAMKTmYDTLV	glucan endo-1,3-beta-glucosidase 14 [Cannabis sativa]	1731678336
VGSLEDNVDSFLSHDDGDGRDmFGTLKRnPEHATEPSKGF	transcriptional corepressor LEUNIG_HOMOLOG isoform X2 [Cannabis sativa]	1731721629
VGSPLTNSPPGNWMqQFNSPIEQSPMQSISnSPGFKSLS	protein MEI2-like 5 isoform X2 [Cannabis sativa]	1731737646
VHRNPIHAMCIWGTqAFPFSTDqETLMWKNTKWSIDLIMDNLEPDm	uncharacterized protein LOC115712763 [Cannabis sativa]	1731692557
VILGASSVISPGSMKPSIGGGGnnGGQENG	F-box protein At5g46170 [Cannabis sativa]	1731736638
VKCEHLCEAKqTFDELSERDVVSWTCVISGLVqSEH	pentatricopeptide repeat-containing protein At4g38010 isoform X2 [Cannabis sativa]	1731687256
VKEEVAHVHLDNSqTPTGNGKENGNGSLGnVAA	protein RDM16 isoform X1 [Cannabis sativa]	1731722209
VKGmGMVVREWVPQVEILGHSSTGGFMSHCGWnS	zeatin O-glucosyltransferase [Cannabis sativa]	1731684240
VKKMREEYIKmDKmEmSIWECCELLNDVVDESDLDSDLPQMEHLL	probable inositol oxygenase [Cannabis sativa]	1731681719
VLQPNVNNLQSNSNMLQNQQHMKQqHEqQmLQ	mediator of RNA polymerase II transcription subunit 15a isoform X2 [Cannabis sativa]	1731683138
VMDDAPAVQEPTAmIGEEISDIDEqPQF	nuclear pore complex protein NUP96 [Cannabis sativa]	1731682530
VMNqqRAMAGNDRFqPmMYARPPPAVNYMPAPYPY	heavy metal-associated isoprenylated plant protein 33 [Cannabis sativa]	1731726314
VmSSLVNSVSPEIAQSImYFDIATDMWNDLAERFNEGNGPRIFqLqTQ	uncharacterized protein LOC115704362 [Cannabis sativa]	1731674045
VnAPESVPDEqISAYLTRMq	phytochrome E [Cannabis sativa]	1731737626
VNPSSGLLISNHFNTENGTSGGGGSGSGGGSGGDQGTNIFSGqIV	protein indeterminate-domain 5, chloroplastic [Cannabis sativa]	1731722472
VNSEIKGSSGFmASYDIFNDLnHHK	two-component response regulator ARR2 [Cannabis sativa]	1731721066
VNVAHSqGIVVNnVRPSCF	protein SPA1-RELATED 3 isoform X3 [Cannabis sativa]	1731678712
VNVGLEmVMEPSLLILDEPTSGLDSATS	ABC transporter G family member 24 [Cannabis sativa]	1731679868
VPAAVDWmnVYPQGmEKIVTYV	beta-glucosidase 46 [Cannabis sativa]	1731682283
VPNSGLSGPGSGqRGGIDTGSESD	transcriptional corepressor SEUSS [Cannabis sativa]	1731666112
VPSLAMDDSRGELHQNIQNASTnTMRVESSGLnQ	uncharacterized protein LOC115712823 [Cannabis sativa]	1731692735
VPSQNAEQGFQDTSTIAADnPnQnLQSRSVADDHSSPF	uncharacterized protein LOC115711407 [Cannabis sativa]	1731666464
VPTSTNMSnPVPLGQLSLPSnNVM	polyadenylation and cleavage factor homolog 4 isoform X4 [Cannabis sativa]	1731677040
VPWVMCKEEDAPDPVINTCnGFY	beta-galactosidase 3 [Cannabis sativa]	1731697807
VqNGMYEEALIMLREmGnAnLK	putative pentatricopeptide repeat-containing protein At3g23330 [Cannabis sativa]	1731724309
VqSPKGSqSKIPSDSESGVLFTmTMNAHI	uncharacterized protein LOC115706224 [Cannabis sativa]	1731678300
VREIAYPQSKLESGYPCNAKGSSSSnSFSDRnAIQTSCSYAEMQV	uncharacterized protein LOC115723459 isoform X2 [Cannabis sativa]	1731724948
VRSSPVASLPSVISAPSGVDDRGSSSS	homeobox-leucine zipper protein ATHB-52 [Cannabis sativa]	1731739578
VSAGGDARAGGGAnTGGTVSGGPSASGNVGG	loricrin [Cannabis sativa]	1731665513
VSANHnEEmLKPILDEEVKSAAFSmHPDKAPGPDSMGPGFFqHH	uncharacterized protein LOC115723549 [Cannabis sativa]	1731725110
VSDAAASATDnFPNTEEALRR	paladin [Cannabis sativa]	1731663681
VSDFDAFQNmmAFLWQPGKGmYVKELnS	uncharacterized protein LOC115696653 [Cannabis sativa]	1731735602
VSHTSKHMVSDqSSVSDTATSSSSSASSPSIQSnLSLQTLP	protein JINGUBANG [Cannabis sativa]	1731691374
VSIATRWHVLVTCASAAGGPDPSKAHFLEAnCKDDqq	uncharacterized protein LOC115700236 isoform X2 [Cannabis sativa]	1731670001
VSLKQTSCSSTDASFmQDFFLLEEKIANLQSLGSnGS	rRNA biogenesis protein RRP5 isoform X2 [Cannabis sativa]	1731741512
VSNGSASSKLDTTAKVSnDHHTSPASnEERTDVEVVDNTTEVFDDHYTS	probable protein phosphatase 2C 62 [Cannabis sativa]	1731730491
VSWTSMISGYARnGDGEqAISFFV	pentatricopeptide repeat-containing protein At2g36980, mitochondrial [Cannabis sativa]	1731710829
VTGNGIPMqSQGNINQGVDQSLHAKNPLSSPESm	ATP-dependent helicase BRM [Cannabis sativa]	1731678991
VTHnNNNNDHNNKLNNLLLSSFVPSL	homeobox-leucine zipper protein HAT4 [Cannabis sativa]	1731705552
VTmHNKnKSTNYSTTTSCSLmKRMT	transcription factor MYB98-like [Cannabis sativa]	1731688338
VTVSTGQTYDRASIESWVATGnTTCP	U-box domain-containing protein 26 [Cannabis sativa]	1731671804
VVEDGEENEDTSVVSGVQD	protein trichome birefringence-like 6 isoform X2 [Cannabis sativa]	1731663467
VVSSTSQNTSnGSLFGnSTSnV	nuclear pore complex protein NUP1 [Cannabis sativa]	1731676205
VVTESGWPSKGDASEPDATIENAnTY	glucan endo-1,3-beta-glucosidase 2 [Cannabis sativa]	1731662804
VWDKVNDNGSFRFDGDLmEALFGC	formin-like protein 4 [Cannabis sativa]	1731684500
VWGALLGGCnVHGDmnIGKMAAEKLIEDELEPLSAGTYS	pentatricopeptide repeat-containing protein At2g35030, mitochondrial [Cannabis sativa]	1731727849
VWGARNDVVWQGKSFNSS	uncharacterized protein LOC115720371 [Cannabis sativa]	1731716795
WAHEQLDEFLGEVqSSRQDmTAK	uncharacterized protein LOC115696598 [Cannabis sativa]	1731735500
WDITDNEDETDVNVVSDSNSAnFVLTVDLGELIMQSnEPPRIVES	uncharacterized protein LOC115699975 [Cannabis sativa]	1731743408
WGGIVTKQGAVDAnADFGFGVYnD	probable endo-1,3(4)-beta-glucanase ARB_01444 [Cannabis sativa]	1731742720
WGMGMRMGmGqELNGnRVWDnESQQR	RING-H2 finger protein ATL66-like [Cannabis sativa]	1731673034
WICTqIFEGHSHYVmQVAFNPNDSnIFT	coatomer subunit beta'-1 [Cannabis sativa]	1731676056
WIRDSEnGKEVLnVEEH	homeobox-leucine zipper protein HDG5-like [Cannabis sativa]	1731706750
WIYHGEPEDAVVDVAVADVESEDEm	uncharacterized protein LOC115719962 [Cannabis sativa]	1731715769
WKqKqDGEFSVKSAYVVDQGHRFDD	uncharacterized protein LOC115717998 [Cannabis sativa]	1731709072
WLLGnGCLFSWNSMLTIGDY	equilibrative nucleotide transporter 3 [Cannabis sativa]	1731740164
WLLHVEGGGWCANRESCSFR	pectin acetylesterase 5 [Cannabis sativa]	1731737071
WNEmNnGKHGnKIKPHEMVLYFALSFLEEFqAA	uncharacterized protein LOC115703724 [Cannabis sativa]	1731672998
WnHLnGSVPPLnQSSLRNFNVSGNN	probable inactive receptor kinase At5g67200 [Cannabis sativa]	1731665993
WnMWGAEAREqGnCAKLR	COBRA-like protein 6 [Cannabis sativa]	1731733104
WPLmSSIMVYCVFQLQDMAYS	protein ZINC INDUCED FACILITATOR 1 isoform X3 [Cannabis sativa]	1731726419
WVAKLVKnVEEMVSGC	lysine-specific demethylase JMJ25 [Cannabis sativa]	1731717908
WVEESNGNGNRNGNVNGnGSRNGIGNGLGMGmAmLIGmGLNENG	uncharacterized protein LOC115703787 [Cannabis sativa]	1731673109
WYDSVTVDGSVLYqNQLTEKNKPFFD	cytosolic endo-beta-N-acetylglucosaminidase 1 [Cannabis sativa]	1731677261
WYWKqVVnAKDQIKSm	uncharacterized protein LOC115720259 [Cannabis sativa]	1731716510
xPDSISSEPSTSSNYFPESSLHSP	LOW QUALITY PROTEIN: protein-tyrosine-phosphatase MKP1-like [Cannabis sativa]	1731677909
YAPSHSGETWSENDNEDMDRAIALSLLEESqKGKRLIDNDSqLqE	protein DA1 isoform X3 [Cannabis sativa]	1731670027
YATESELLDqFnDIGSHGTKVIVYnL	protein MICRORCHIDIA 6 isoform X2 [Cannabis sativa]	1731686521
YEQASGQQVNYSKSSVFFSKnCSVDTRSSLCQLMGMVEAGD	uncharacterized protein LOC115696336 [Cannabis sativa]	1731735063
YFDAqLTPLGWNQVDNLNKHVQ	phosphoglycerate mutase-like protein 1 [Cannabis sativa]	1731706865
YGDLQSLSLSmSPGSQSSCVTGSQKQqQISPPVTD	AP2-like ethylene-responsive transcription factor CRL5 [Cannabis sativa]	1731692699
YGNCKEMGTGGVENQFQGFHRSSSGnKMVDLSSTNTPVLE	uncharacterized protein LOC115720589 isoform X2 [Cannabis sativa]	1731717346
YGPMGFDIGAFxGKLDLAYFAqDGH	LOW QUALITY PROTEIN: methylthioribose kinase-like [Cannabis sativa]	1731671884
YGVmTGCLEGKnGIIKGVLMSnCEGL	uncharacterized protein LOC115704102 [Cannabis sativa]	1731673627
YGYSKLYGVGRAYNmFNHmPERDNVSWnTMISIFSq	pentatricopeptide repeat-containing protein At2g13600 [Cannabis sativa]	1731663327
YHSPSPLSQTNDGVSSWSSASQnPInGNDGVL	transmembrane protein 53-A [Cannabis sativa]	1731696129
YKNTGSADNMFRFFnALGqISFAFAGHAV	lysine histidine transporter-like 6 isoform X2 [Cannabis sativa]	1731744950
YLETNDLSnPIEANPAEFDILDEYL	NAC domain-containing protein 53 [Cannabis sativa]	1731677736
YMDLSnnRLSGRIPTGTQLQTFnASMYSmNLGLCGPPL	receptor-like protein EIX2 [Cannabis sativa]	1731710156
YNADVSDRELMVRELEVALHDAEQQFSqEK	protein NETWORKED 4A [Cannabis sativa]	1731675691
YNLYAWVPGFIGDYKnDLLINIDTGCDIDMGE	probable rhamnogalacturonate lyase B [Cannabis sativa]	1731669263
YSSnVRNLVCMEELKLmGMKSH	uncharacterized protein LOC115710771 [Cannabis sativa]	1731688617
YSTMQQVmQNPQFMTMAERLGNALMQDPS	ankyrin repeat domain-containing protein 2A [Cannabis sativa]	1731671474
YSYLEGVEELLNALKnnnYEMHAFTNYP	flavin mononucleotide hydrolase 1, chloroplatic [Cannabis sativa]	1731709635
YTSTDATGRPTGGLSVSFADSNGNAIG	AT-hook motif nuclear-localized protein 1-like [Cannabis sativa]	1731694731
YWGMTSTKAQSMSHGLASPRSSADEnQQPAEASGVGRSWVQSMFSRD	DENN domain and WD repeat-containing protein SCD1 isoform X2 [Cannabis sativa]	1731685586
YWGTISTPYCnETVELADAYLIAGPVFnDYINVGHSL	pyruvate decarboxylase 1-like [Cannabis sativa]	1731711786
YYDDGVGTSLRPLPPSISEFFmGSGFD	probable E3 ubiquitin-protein ligase RHC2A [Cannabis sativa]	1731738087
YYITTNNNNNISSATIDYmTSSFESCLTDHqRENCIER	ethylene-responsive transcription factor ERN2-like [Cannabis sativa]	1731740725
YYqSLFQQKmGWRVQVVDGGLPDMYN	cytochrome b561, DM13 and DOMON domain-containing protein At5g54830 isoform X2 [Cannabis sativa]	1731741195
AGqLKInVDGAIFEATDqISTCFVARDCEGRLVETFST	uncharacterized protein LOC115702242 [Cannabis sativa]	1731663140
VKCLAMIGnKVYCGCSGYnIQEVDLC	LOW QUALITY PROTEIN: putative E3 ubiquitin-protein ligase LIN-1 [Cannabis sativa]	1731663568
VLIMKNNNNKRVAVDDDNSmCLVPDnHqP	transcription factor PIF4 [Cannabis sativa]	1731663651
FQVDHLPnnQAnWSSFVVESFYKTYDKYTIEAAHAA	uncharacterized protein LOC115719331 [Cannabis sativa]	1731663779
PCAPGRQYYGRGPMQLSWNY	endochitinase 2 [Cannabis sativa]	1731664173
PYGRPRPSAqYIGnMqTARGSYVGSFGYQQ	RNA-binding protein 24-B [Cannabis sativa]	1731666568
DGYCPEVSVKIGGDSLqTSTW	interferon-related developmental regulator 2 isoform X2 [Cannabis sativa]	1731667100
LNPPDQKNGLGnnKGGSSSSS	probable serine/threonine-protein kinase PBL11 [Cannabis sativa]	1731667189
mAFVSLEFRCSnAGGDVVEIAPKPVNPDCFV	defensin-like protein 58 [Cannabis sativa]	1731667743
TAqPqAnLIEHTLDYDPHAFIAQSILDFGDDVGWYVD	uncharacterized protein LOC115695949 [Cannabis sativa]	1731668951
IADGNELLRFHCATFmCSLGLNGSSNLCNSM	uncharacterized protein LOC115697242 [Cannabis sativa]	1731669151
RKEnGKCPAVCGAnDmEIDGNVTSLHHGVSLPSHL	ubiquitin carboxyl-terminal hydrolase 26 isoform X3 [Cannabis sativa]	1731669223
EEALRqVGSnSVELAmEWLFSHPEEVHED	LOW QUALITY PROTEIN: E3 ubiquitin-protein ligase UPL2-like [Cannabis sativa]	1731669273
EKSGSFQSSqPLGVVNDDSSGRLDVPDQLGSHmYGPINS	histone-lysine N-methyltransferase ASHH2 isoform X2 [Cannabis sativa]	1731669482
HFLSENQISTVnY	DEAD-box ATP-dependent RNA helicase 39 [Cannabis sativa]	1731669498
GAPGPSmVNNSGNNRqqLMSAAPSQP	SWI/SNF complex subunit SWI3C isoform X2 [Cannabis sativa]	1731669813
DPQLLNmLQqqYLLq	uncharacterized protein LOC115700657 [Cannabis sativa]	1731670106
IGLTWqEMQETLLSFDS	uncharacterized protein LOC115702365 [Cannabis sativa]	1731670648
GGGGGGSGGGGSASGVSnnPFPDPSSAAGLPFFnLPMNNmPQLP	AT-hook motif nuclear-localized protein 23 [Cannabis sativa]	1731670913
YSFSVKVEEGCqMNTVDqIAASVNqMMHRINAEL	transcription factor bHLH94 [Cannabis sativa]	1731671249
ISLSDYDEFVEDGNGDLVNKmMASKHLFE	extra-large guanine nucleotide-binding protein 1 [Cannabis sativa]	1731672371
FGQDNYGSASYRLGTPYLGNPMAnSVLPSVGSGSPmLQnE	pumilio homolog 4 [Cannabis sativa]	1731672789
nAnLEGALATGNTSF	thylakoid lumenal 15 kDa protein 1, chloroplastic isoform X2 [Cannabis sativa]	1731672832
CHLVDLqFLDLSSNDmSSRIPnCLS	receptor-like protein EIX1 isoform X2 [Cannabis sativa]	1731672844
NTEYmAMMKRMAELEEKVSVLnMKPVSMPPEKEEM	phosphatidylinositol/phosphatidylcholine transfer protein SFH3-like [Cannabis sativa]	1731673279
PnDRSKAGFGETDCKAITDAVNFPKDD	uncharacterized protein LOC115703967 [Cannabis sativa]	1731673408
IKMNDRKDKnALDYLEGSLLMnQG	cytokinin dehydrogenase 3 [Cannabis sativa]	1731673693
NLQDSVqALNDmSFDTVQSFVSAAm	putative invertase inhibitor [Cannabis sativa]	1731673709
AEKEDISCGDSqqGKGNLLE	uncharacterized protein LOC115704233 [Cannabis sativa]	1731673839
PKANKSAAImSGGNKFGFGLFFQERPqYFSDGHRTYYG	blue copper protein-like [Cannabis sativa]	1731673876
VKEDmnRnYRGIWYGDSPFnFVFP	LOW QUALITY PROTEIN: cation/H(+) antiporter 15-like [Cannabis sativa]	1731675371
MQHDqATIVDSGGIVCRGSASPVEMD	LOB domain-containing protein 12-like [Cannabis sativa]	1731675502
MnLmWnSEIVIDGGnDTLVATSLLEAS	LOW QUALITY PROTEIN: uncharacterized protein LOC115705182 [Cannabis sativa]	1731675672
LGDNLGAPGNRSTAPDMLNm	protein PLASTID MOVEMENT IMPAIRED 1-RELATED 1 [Cannabis sativa]	1731675683
GGqHPGGIGVPAVGmAFPGY	protein MLN51 homolog [Cannabis sativa]	1731675896
PQNPSPFQAPGnLGLMADGSnFSLG	nuclear pore complex protein NUP1 [Cannabis sativa]	1731676205
WLQHSNGAKLITDqDSVSVASSQENG	protein VASCULAR ASSOCIATED DEATH 1, chloroplastic isoform X2 [Cannabis sativa]	1731676283
SRLEYENLVELMEqNASGAGqSPVNFVG	LOW QUALITY PROTEIN: conserved oligomeric Golgi complex subunit 4-like [Cannabis sativa]	1731676370
EVFTDSLENFDPSNLAVLQLDQCG	uncharacterized protein LOC115705507 [Cannabis sativa]	1731676484
YPLPGmNPSGATNGPNmPVVMVY	LOW QUALITY PROTEIN: uncharacterized protein LOC115705525 [Cannabis sativa]	1731676521
LFmNQLSGNIPEGLGKLPGLMDFSLFMnnL	receptor-like protein kinase 5 [Cannabis sativa]	1731676850
QHENDIKWPNGLSFFnALTGKSDDAK	protein RICE SALT SENSITIVE 3 [Cannabis sativa]	1731677510
VVLLELATGREAnnGGGDEH	receptor-like protein kinase 5 [Cannabis sativa]	1731677945
GLLHDRSKLNDGLEECRS	DNA-directed RNA polymerase III subunit 1 [Cannabis sativa]	1731678375
GAADPAPEQWGKTTVEEQYESSIGGW	dynamin-related protein 5A [Cannabis sativa]	1731678479
QqTLPSLKACAAGYQSSVDFNANRmKGVYm	beta-amylase 7 isoform X3 [Cannabis sativa]	1731679087
LVSAESISCANVCCnAAKNTVSmVT	protein phosphatase 2C 16 [Cannabis sativa]	1731680315
NSGNNNGnCGGVIVEMGKGGVAG	myb family transcription factor EFM [Cannabis sativa]	1731681529
TMSNHADQVWGVAFGPAGGPG	WD repeat-containing protein VIP3 [Cannabis sativa]	1731682502
LGLCGSGFAALNPCNSSDHVNPNRPEPFGTGSAGLPTRD	protein NSP-INTERACTING KINASE 2-like [Cannabis sativa]	1731682808
VNAGFEVGVVPFnPDGWGPME	eukaryotic translation initiation factor 3 subunit D [Cannabis sativa]	1731682946
HqPINNNNNNGDIISPNFGFMNNHHQ	LOW QUALITY PROTEIN: NAC domain-containing protein 43-like [Cannabis sativa]	1731683118
NPAnSRPTDPGSIVMPPQVHnQGQ	mediator of RNA polymerase II transcription subunit 15a isoform X2 [Cannabis sativa]	1731683138
nGKSFSSSnGGEEGGKGnLFGELSR	cytochrome P450 71A1 [Cannabis sativa]	1731684770
GIAEYSLSqSnLETIFnHFA	ABC transporter A family member 1 [Cannabis sativa]	1731685354
AGLVYEFVFISHTGHEqLPTTD	aquaporin TIP1-1 [Cannabis sativa]	1731685516
PIGGLGEIGmNCMLVGNYDRYILIDAGVMFP	ribonuclease J isoform X1 [Cannabis sativa]	1731685899
SPGKVENRRENNNnnqEEYVER	probable auxin efflux carrier component 1c [Cannabis sativa]	1731685974
RIFFGGFFIRGHAYTmDTISFAVQFWSqGEAqAMF	pantothenate kinase 2 [Cannabis sativa]	1731686286
IGAMLEEIqGLYQQHHQ	transportin MOS14 isoform X2 [Cannabis sativa]	1731686972
ALFLSGVGGGGGGGPSKqMDA	uncharacterized protein LOC115710013 isoform X3 [Cannabis sativa]	1731687144
HCQELQCLPEELPTSLSSLDIYN	putative disease resistance RPP13-like protein 1 [Cannabis sativa]	1731687674
ANVKFCWYqPSSKDEISKIFSHG	LOW QUALITY PROTEIN: probable inactive poly [ADP-ribose] polymerase SRO5 [Cannabis sativa]	1731687686
PAGKEQTEAHSGAKnmTAIRNS	uncharacterized protein LOC115710453 [Cannabis sativa]	1731688111
SmNSVGIKTAnImSHVALqSGGYERMP	protein FAR1-RELATED SEQUENCE 5-like [Cannabis sativa]	1731688687
WnIEDVqVnVFVPFmLSY	putative disease resistance protein RGA3 [Cannabis sativa]	1731689034
RSANRVAHCIARNSCFW	uncharacterized protein LOC115711045 [Cannabis sativa]	1731689038
WAnEVRVFInGGGGGGAGGGGnGR	probable membrane-associated kinase regulator 4 [Cannabis sativa]	1731689325
GSDFSGYGEIGNGGNnSFKSYGLnGNNPK	polygalacturonase 1 beta-like protein 3 [Cannabis sativa]	1731689875
PPHLAAGmTSFPYYPVSVCLQPGQMPTNHSWPSFGnSSS	two-component response regulator-like APRR1 [Cannabis sativa]	1731690163
QLqGGGGFIVNPLAEISRNPmGNSM	TORTIFOLIA1-like protein 3 [Cannabis sativa]	1731690415
GSqVVTAGIKTDYNqQYNNnLMATGCCG	uncharacterized protein DDB_G0283357 [Cannabis sativa]	1731690782
KLVDnEqmFEKYPWGP	uncharacterized protein LOC115712369 [Cannabis sativa]	1731691633
RKSYmGNDHATnGPnmAKELVPVTSTST	RNA polymerase II C-terminal domain phosphatase-like 3 [Cannabis sativa]	1731692363
PAPNPFETqDPFAMSNNIAAPHSVqMAAMTq	putative clathrin assembly protein At2g01600 isoform X2 [Cannabis sativa]	1731692536
qSPAAAPSKTPAAPAP	lysine-rich arabinogalactan protein 18 [Cannabis sativa]	1731692705
QVPNqPVmPqQNGNPHPSQmQTLTAPP	histone acetyltransferase HAC1 isoform X4 [Cannabis sativa]	1731693398
LGDIVGLEGKEHnDGVDAMEH	uncharacterized protein LOC115713619 [Cannabis sativa]	1731694279
WVGEECQYVNLIVnGAEH	B3 domain-containing transcription factor VRN1 [Cannabis sativa]	1731694529
PQNLAATPTTAASAYAVPQNLAATPTVAGSASnNS	protein SIEVE ELEMENT OCCLUSION B [Cannabis sativa]	1731694857
AAPGGGAASAPRGQSPSGASGY	heterogeneous nuclear ribonucleoprotein 1 [Cannabis sativa]	1731695089
NPRNDVAPqNDVGGNKLGEMPSIQH	light-inducible protein CPRF2 isoform X2 [Cannabis sativa]	1731695226
GSYTVQQNYSnMDIHVGQSYSFLVTMDQNASSDYYIVASP	monocopper oxidase-like protein SKU5 [Cannabis sativa]	1731695554
LGSLSVGLAGDPYVFYDWSVSY	monocopper oxidase-like protein SKU5 [Cannabis sativa]	1731695554
QNGHSENSVRAESDSTEKSNSFVGTEEYVAPEIISGEGH	serine/threonine-protein kinase OXI1 [Cannabis sativa]	1731695757
DCDSNAQKnKVKEVVnLmEIELGNGF	protein CHROMOSOME TRANSMISSION FIDELITY 7 [Cannabis sativa]	1731695934
SSILmSEQKSVAAAKqTSPmKVEISNTCSFm	uncharacterized protein LOC115714399 [Cannabis sativa]	1731696038
IVKQGNAMGLPPnSSDAHTINGKPGP	laccase-11 [Cannabis sativa]	1731696075
RKRGVFqKELqHmmYGFGDDPNPL	transcription initiation factor TFIID subunit 13 [Cannabis sativa]	1731697408
SGDETVPYHSLSWCKNWLGPKVNITRTPQSEHDGS	phospholipid--sterol O-acyltransferase isoform X2 [Cannabis sativa]	1731697912
IMGFEVVPQECVEYIqqY	acid phosphatase 1 [Cannabis sativa]	1731698069
SKLSSMmPDLEVPqESLASTSVKGSS	uncharacterized protein LOC115715312 [Cannabis sativa]	1731698399
EKQQSLLDQNnNNYDYDYDYELVS	terpene synthase 10 [Cannabis sativa]	1731704070
NSPAEVSKDVDVLVImVTNESqAEnALFG	uncharacterized protein LOC115716025 [Cannabis sativa]	1731704597
nnnHRHRGNAGGGGGGGRTPKPPQSDQSLTVTT	RNA-binding KH domain-containing protein RCF3 [Cannabis sativa]	1731705231
VEASGVnGEIGDSSLmDV	uncharacterized protein LOC115716267 [Cannabis sativa]	1731705251
FSNTNGNNVRVRNYSVqRGRWNEGS	probable DEAD-box ATP-dependent RNA helicase 48 [Cannabis sativa]	1731706291
VSnYACVQSHSSFQTEEFLEmKP	heat stress transcription factor B-2a [Cannabis sativa]	1731706840
VPLEGENAASnLDDGSFqqVVKMSKF	beta-amylase 1, chloroplastic [Cannabis sativa]	1731707189
YnGKWWEGLITnVSKDCLN	protein AGENET DOMAIN (AGD)-CONTAINING P1 [Cannabis sativa]	1731707502
GVAGYVPGAQFFGTVPAAAPPmSGING	uncharacterized protein LOC115717965 [Cannabis sativa]	1731709018
DMNNIRINSmAASENEETSTTCTYTTVLSYDMLINN	E3 ubiquitin-protein ligase Praja-2-like [Cannabis sativa]	1731709302
EQDGqGSPDEIKPVSLDSENPSLRLSDqEmQD	GATA transcription factor 28 isoform X3 [Cannabis sativa]	1731710178
VNLWTmVLTNHTNPQIWGPDSF	cytochrome P450 714C2 [Cannabis sativa]	1731710909
GKGGGKGGKGSGAGGGGGGKMGqMGEmGRGGGGG	heavy metal-associated isoprenylated plant protein 34 [Cannabis sativa]	1731711820
LPSRNSNLSDTESAVqSNHTNGYG	F-box protein At1g78280 [Cannabis sativa]	1731712039
LPQMFNYENKGGGGGVDSNHL	nicalin-1 [Cannabis sativa]	1731712995
VMSSAAGKTPAPGQAMYSASKHALNG	dehydrogenase/reductase SDR family member 7 [Cannabis sativa]	1731713455
GPIAWVAnRCNPIQDSSSGS	G-type lectin S-receptor-like serine/threonine-protein kinase SD1-1 [Cannabis sativa]	1731714857
IDNGVLGSPAVPPLSTADSPqSSnAm	uncharacterized protein LOC115719896 [Cannabis sativa]	1731715611
ATQAIPmTTmSSGLSSPEVVSHVSQMDTLSHAPADSSNMG	uncharacterized protein LOC115720000 [Cannabis sativa]	1731715860
YSSMDLKKSmEDGEKRFNqLSIEERGK	uncharacterized protein LOC115720760 [Cannabis sativa]	1731717927
STMFNSKIIGLVNGTAAGWGNmGGGATQLLMPVVYE	high affinity nitrate transporter 2.4 [Cannabis sativa]	1731718917
IEKINNDDNnnnKQQVVVANNDHD	uncharacterized protein LOC115721364 [Cannabis sativa]	1731720051
SAAPTDQAPPEPADPLAEP	putative bifunctional UDP-N-acetylglucosamine transferase and deubiquitinase ALG13 [Cannabis sativa]	1731720726
RLLFCNMGQRnVVSWTTmVAGYAnCGDMEAAKE	putative pentatricopeptide repeat-containing protein At5g37570 [Cannabis sativa]	1731720827
SAVMSSSTKTSnGVLGEITnSnDISSPR	tyrosine/DOPA decarboxylase 1-like [Cannabis sativa]	1731721009
GKVDETCMQSREIWTGVTYGVAATMILAGmEEQAFA	LOW QUALITY PROTEIN: non-lysosomal glucosylceramidase [Cannabis sativa]	1731721635
NmEDLVqTKTMGnVEDGREGSASS	uncharacterized protein LOC115722274 isoform X2 [Cannabis sativa]	1731721968
CQGmRCPANTHKPSFHVNTSLTTKHSVGKGSSSGQKGGKmPANnVEDCMT	uncharacterized protein LOC115722314 [Cannabis sativa]	1731722078
REKMSETAmRKLEDELEnmKCLARQKEEDAQH	kinesin-like protein KIN-12C [Cannabis sativa]	1731722587
HLKVMTGQPMPNSGPMMNFSSFGGSQqF	probable transcription factor PosF21 [Cannabis sativa]	1731723629
LGVVGGADGPSFSDETEEDLLSmYLD	probable transcription factor PosF21 [Cannabis sativa]	1731723629
SLANNNGGGGGGSSnLNVFGGFmNALGG	protein indeterminate-domain 4, chloroplastic [Cannabis sativa]	1731724061
ALQLGMEIHAMVTKTGFn	pentatricopeptide repeat-containing protein At4g02750-like [Cannabis sativa]	1731724152
EGIPGENDTEIqHL	DNA mismatch repair protein MSH1, mitochondrial isoform X3 [Cannabis sativa]	1731724367
LGIKNNEISNLFEDGMQFYSInCY	protein SRG1-like [Cannabis sativa]	1731724587
VAELEGSDAGINDQVNSSKENDNQTSIDLPVSSIDmEDK	chromatin structure-remodeling complex protein SYD isoform X2 [Cannabis sativa]	1731724728
GYCLDGFERLLVYE	LOW QUALITY PROTEIN: receptor protein kinase TMK1-like [Cannabis sativa]	1731725542
TGDGGPSGRFEQTNTNMESSGVDFAGIKEKQDFLHGKHD	uncharacterized protein LOC115723978 [Cannabis sativa]	1731725828
AVNVCYAVDYIVGDSAGW	blue copper protein-like [Cannabis sativa]	1731725852
AEVVSSSTEMEPDNVATGVKEG	uncharacterized protein DDB_G0271670 [Cannabis sativa]	1731725935
VWHAITGYWGGVKPGVKEMEGYDSVm	probable galactinol--sucrose galactosyltransferase 6 isoform X2 [Cannabis sativa]	1731728596
DVPAARNSSHVnSGPSMqLqGSASTAmQSH	probable WRKY transcription factor 2 [Cannabis sativa]	1731729781
EHLDGQRGRILDFn	calmodulin-binding receptor-like cytoplasmic kinase 3 [Cannabis sativa]	1731730072
QMVYASAVEmADAGVNnPKFnVTWNFNVDGAFTY	probable receptor-like protein kinase At4g39110 [Cannabis sativa]	1731732207
RGAAnGISmTVmSLFKAAGPAGGGALFSW	protein ZINC INDUCED FACILITATOR 1-like [Cannabis sativa]	1731733368
FHDLHNDGFPRLKELSFGNNDGFH	disease resistance protein At4g27190-like [Cannabis sativa]	1731733718
RKGGTKIISLqTTmNDDNSEDGCDALPPPASILLPCGSCS	DPH4 homolog [Cannabis sativa]	1731733742
SGDYGNIPRHALGDPGDF	protein ENHANCED DOWNY MILDEW 2 isoform X2 [Cannabis sativa]	1731734257
EVILQDSRKTnKEnNLSVEISDSQmE	uncharacterized protein LOC115696397 [Cannabis sativa]	1731735160
VIRSDNqIPVEEPInEDESVPGGSAQTRDYYS	protein OCTOPUS [Cannabis sativa]	1731737223
QQYPHqPPLqYmGYNqQGIPPQGH	DEAD-box ATP-dependent RNA helicase 40 [Cannabis sativa]	1731737630
AAAAAAATVAPIELSTSQSQEENTNR	protein kinase PINOID [Cannabis sativa]	1731738482
IGVGIGCGFnNNQmSSSGGGGGGGGGGSGSPSAVGG	LOB domain-containing protein 12-like [Cannabis sativa]	1731738763
GDIGVGIGCGFnNNQmSSSGGGGGGGGGGSGSPSAVG	LOB domain-containing protein 12-like [Cannabis sativa]	1731738763
VAIGGSENFYSTFESEFAGVI	eukaryotic translation initiation factor 6-2 [Cannabis sativa]	1731738961
PPSINPPSWAGFSPLAAYLFSWQ	mediator of RNA polymerase II transcription subunit 16 isoform X3 [Cannabis sativa]	1731739083
IKNGGqPVSSSDqLAQQRDCSS	uncharacterized protein LOC115698247 [Cannabis sativa]	1731739277
AAnGAGLPPEDKPKLCDVACEKELEnVPM	peptidyl-prolyl cis-trans isomerase FKBP16-3, chloroplastic [Cannabis sativa]	1731739928
MqIHAmGLKSVSCmPnPPGFMGIVPTSGPTSMTQ	cellulose synthase-like protein H1 isoform X2 [Cannabis sativa]	1731740051
nnALPKKVVAVDnDGDDSmYKSSFGGLSKSETSADD	probable inactive receptor kinase At2g26730 [Cannabis sativa]	1731740839
CHSIEVALDALqSIPDLDDELLLDACDL	L10-interacting MYB domain-containing protein isoform X2 [Cannabis sativa]	1731742002
EEVTRImNVEADCPYEILGInqnR	nucleolar and coiled-body phosphoprotein 1 [Cannabis sativa]	1731742136
VMEHLTFALSVCnqSSVLAnQVEEIMPGVY	protein NPG1 [Cannabis sativa]	1731742539
QQFDMYQDFSQGLIVGANSInQCGQDPLPNVLP	transcription factor VOZ1 [Cannabis sativa]	1731742615
FAKHnnAAHnSVVTHRR	protease Do-like 10, mitochondrial [Cannabis sativa]	1731742833
WPSAGNLPAAPSRGGNVPS	rhomboid-like protein 20 [Cannabis sativa]	1731744314
APVTEAASEDAGEDIPEEEAVCRICF	uncharacterized protein LOC115700731 [Cannabis sativa]	1731744861
EKGCQATQGENPFIWQCWAVLEKSmGNI	protein high chlorophyll fluorescent 107 [Cannabis sativa]	1731745238
LASnRHGNPGSTPLSGPNS	serine/threonine protein phosphatase 2A 57 kDa regulatory subunit B' theta isoform [Cannabis sativa]	1731746366
LKqYqAKADYFACAmLQKNGGYnAHL	endoglucanase 5 [Cannabis sativa]	1731682789
LKqYqAKADYFACAMLQKNGGYnAHL	endoglucanase 5 [Cannabis sativa]	1731682789
QHMSSLQQQQPQPQQQQQQPSSSQQAHEHFGQQVPQ	transcription initiation factor TFIID subunit 12-like isoform X2 [Cannabis sativa]	1731686513
QHMSSLQQQQPQPqqQQQQPSSSQQAHEHFGQQVPQ	transcription initiation factor TFIID subunit 12-like isoform X2 [Cannabis sativa]	1731686513
