# Supplementary material for: Hempseed and hempseed protein extract: antioxidant potential, peptidomic analysis and muscle cell protection under heat stress conditions
Source: Research Square preprint supplement (doi:10.21203/rs.3.rs-6511890/v1), 2025-05-28
Supplement: Supplementary file 1 [file 2cd3ba395a157bcb822af6d8.pdf]

## Supplementary materials

**Supplementary Table 1.** List of the peptides identified in HSC digest. The Table reports the sequence of the peptide identified with high confidence (X correlation  $\geq 2.5$ ) and name and accession code of the corresponding protein from which the peptide was generated. Lowercase letters in the sequence indicate PTMs: deamidation of Asn (n) and Gln (q) and oxidation of Met (m). Peptides exclusively present in HSC digest are in bold. The sequence stretch corresponding of bioactive peptides in SATPdb and DFBP data banks are in red.

**Supplementary Table 2.** List of the peptides identified in HSD protein extract digest. The Table reports the sequence of the peptide identified with high confidence (X correlation  $\geq 2.5$ ) and name and accession code of the corresponding protein from which the peptide was generated. Lowercase letters in the sequence indicate PTMs: deamidation of Asn (n) and Gln (q) and oxidation of Met (m). Peptides exclusively present in HSD protein extract digest are in bold. The sequence stretch corresponding of bioactive peptides in SATPdb and DFBP data banks are in red.

**Supplementary Table 3.** Sequence of the bioactive peptides present in SATPdb and DFBP data bases. The table reports the sequence of the bioactive peptides listed in SATPdb and DFBP data bases identified in HSD and HSD protein extract data sets.
