# Supplementary material for: Hempseed and hempseed protein extract: antioxidant potential, peptidomic analysis and muscle cell protection under heat stress conditions
Source: Research Square preprint supplement (doi:10.21203/rs.3.rs-6511890/v1), 2025-05-28
Supplement: Supplementary file 2 [file 61d41cc7ed57e4f5a1308ee0.xlsx]

## Sheet: Foglio1
HSD protein extract
Peptide Sequence	Protein Name	Accession Code
AAGASLQQQQqqPGEPqQQQPQLm	probable DNA-3-methyladenine glycosylase 2 isoform X2 [Cannabis sativa]	1731670160
AAqAPPmWAGQPQGPPQQTQPSQQPQPTSS	polyadenylate-binding protein RBP45 [Cannabis sativa]	1731682237
ACKYASIFqEFLQHSDLPVWnRFK	zinc finger CCCH domain-containing protein 24 [Cannabis sativa]	1731713646
ADNAVAAAnKNLFm	GDSL esterase/lipase At5g45950 [Cannabis sativa]	1731738449
ASTLRANGITmCSqAGELFSVYT	WD repeat-containing protein 62 isoform X3 [Cannabis sativa]	1731734900
AVSqSQRGAANGISMTVmSLFKAAGPAGGGALFSW	protein ZINC INDUCED FACILITATOR 1-like [Cannabis sativa]	1731733368
CGYKRAGSSnSTPRVWGKEM	protein Brevis radix-like 2 [Cannabis sativa]	1731680409
CLNFLRFYGRRFTETSVMEEVTEQNVAELHPPAn	G-type lectin S-receptor-like serine/threonine-protein kinase At5g35370 [Cannabis sativa]	1731666367
DEENIKVTmDDFLNACHEIVPAFGASTDDLKRSRLNGM	vesicle-fusing ATPase [Cannabis sativa]	1731737043
DGIGNREFRFIGPPLPnDHTnFQVmADFCTRTVSTIW	(R)-mandelonitrile lyase-like [Cannabis sativa]	1731696642
DmRRNFKmEGnGSSQESDLESHIRLnKDTLMNS	chaperone protein dnaJ 10 [Cannabis sativa]	1731706369
DTFAQSqGIEMNTVHCKAIFGqGFVGDTPLFLAKPQTYm	peptidyl-tRNA hydrolase, mitochondrial isoform X2 [Cannabis sativa]	1731730475
DYmFQASCAASLNISSEAAVAAAAPSGVSAGVGGAAGSSIGLSmI	AP2-like ethylene-responsive transcription factor BBM2 [Cannabis sativa]	1731711763
EKEFSSAIPSRqGNAqRPEVRIVSWInDE	vacuolar protein sorting-associated protein 41 homolog [Cannabis sativa]	1731746025
ELnSRECSGSCSGDPMRVSRGFDLERPAEEDISTGVSAIGEnP	uncharacterized protein LOC115694826 isoform X2 [Cannabis sativa]	1731732360
EnVGEVGHEEYYnQVFGGTQYIQQGLSnGLPDVDSVF	probable glycosyltransferase STELLO1 [Cannabis sativa]	1731686251
ERGLARSGAVEGSEnEHEVYRV	uncharacterized protein LOC115720981 [Cannabis sativa]	1731718771
ESMHRFDGSCSSSTGHYSFFGQIPGTPPAIPGMFPNmFPLATGQQFGALPVMPVqAMT	splicing factor U2af large subunit A isoform X4 [Cannabis sativa]	1731696067
EVAAAATVAANNNNnAGKDDGGPGY	transcription factor MYB1R1 [Cannabis sativa]	1731686331
EVPCSHALAVIAKKRLnCYEFCSAYYKTETmKATYAET	uncharacterized protein LOC115696795 [Cannabis sativa]	1731735832
FATSFSSQSGAGSPGFHHTGNmPGLHNIHGSFNVPTm	probable NOT transcription complex subunit VIP2 isoform X2 [Cannabis sativa]	1731712413
FLGKVGQPEESEAPQEVWYQKFDHQNN	uncharacterized protein LOC115709519 isoform X2 [Cannabis sativa]	1731685877
FLLHTLQLQSWEKTVDCHSPGQGLmP	alkaline/neutral invertase A, mitochondrial [Cannabis sativa]	1731724812
FmqKEAAGLEGRSmDVGnLK	AP2-associated protein kinase 1 isoform X2 [Cannabis sativa]	1731728398
FNHFGEGLVQRMPRCRHGYFHVVNnDYTHWKMYAIGGSASPTInSQGN	probable pectate lyase 5 [Cannabis sativa]	1731696929
FYMLLPqPLVSKAKH	cytoplasmic tRNA 2-thiolation protein 2 [Cannabis sativa]	1731724235
GAAASHEIISTSDRnQRDLQGSLWKTS	nuclear pore complex protein NUP1 [Cannabis sativa]	1731729151
GDSFQKMSSLLNKLmEYVLSENPAnDPPES	U-box domain-containing protein 14 [Cannabis sativa]	1731677570
GDVYPLPEHQQEWAHKQYIAKHQQGPSqqWGNFYYFRm	uncharacterized protein LOC115715059 isoform X2 [Cannabis sativa]	1731697643
GFVIGPFLQPTLnFTMEMILNIINNEENFPNMmYDFSDVRDIAmAHI	tetraketide alpha-pyrone reductase 1 isoform X2 [Cannabis sativa]	1731729574
GGGGGSGGGGSASGVSNNPFPDPSSAAGLPFFNLPMnNmPQLPA	AT-hook motif nuclear-localized protein 23 [Cannabis sativa]	1731670913
GGGGNnLNGGKKGGGGLDGAQVQAmNKGFQHmGPGG	heavy metal-associated isoprenylated plant protein 33 [Cannabis sativa]	1731726314
GGnFALYLDGDLLnGTSGPCETFGnMCLAHNQEFELKN	TLD domain-containing protein 2 [Cannabis sativa]	1731720531
GHCFRTLPLPPQPIPSCPNCNSERFCnHNCLSAASTSTH	histone-lysine N-methyltransferase ASHR2 [Cannabis sativa]	1731696312
GHMQmHSLQmLQQPQQASHMnTFYQQ	protein virilizer homolog isoform X2 [Cannabis sativa]	1731746169
GLIPSPNNNDNnISRVLDnEKEDLEGSEEqGRGEEY	protein TRANSPARENT TESTA 1 [Cannabis sativa]	1731684900
GLRRSnSASLRSHREDNGSSVDSAINSHE	regulator of MON1-CCZ1 complex [Cannabis sativa]	1731742054
GLVRqQLDSFDEFIQNTmQEIVDESSDIEIRPESQHnPGHQSDF	DNA-directed RNA polymerase II subunit RPB2 [Cannabis sativa]	1731738727
GmPWLPQNSQPYPFQMAMPNMFAqqVDPNqRL	H/ACA ribonucleoprotein complex non-core subunit NAF1 isoform X2 [Cannabis sativa]	1731742786
GNNKGNNNNGKDNDGNGNGNNnGnNAKAKK	uncharacterized protein LOC115720518 [Cannabis sativa]	1731717145
GPQSLGMNANFMFPQGAmPYNMPPGFMYNQALPSqqI	protein MODIFIED TRANSPORT TO THE VACUOLE 1 [Cannabis sativa]	1731681589
GPRGGGGGPPRLMGMMGVPRMn	N6-adenosine-methyltransferase MT-A70-like [Cannabis sativa]	1731705203
GSQYQGqmSmPPPSQQPSSTPYYPNMYNSASQQLPPT	ataxin-2 homolog [Cannabis sativa]	1731689056
GTSnSILAPSSTPHGSSSISnLSNTM	LOW QUALITY PROTEIN: SCY1-like protein 2 [Cannabis sativa]	1731705088
GVKELLPSYHDKELqmKDLETGLCFA	GDSL esterase/lipase EXL3 [Cannabis sativa]	1731668517
GVSnELLIGAnFASAASGYDDSTAnLYLA	GDSL esterase/lipase At5g22810-like [Cannabis sativa]	1731744111
HESIKLDSSGEGIVAAGGDKNYASG	kinesin-like protein KIN-4C isoform X2 [Cannabis sativa]	1731667419
HPFqTIICKEGENPIPWSKVQCVLWFPnLGSSSEmMEQ	LOW QUALITY PROTEIN: DExH-box ATP-dependent RNA helicase DExH8 [Cannabis sativa]	1731664071
HSNNTVKSAPGTGAPqMLnFGVPSTAGSPPSq	AT-hook motif nuclear-localized protein 13 isoform X2 [Cannabis sativa]	1731705451
HYFTNqDKDGKTAEFDLIDGGMAAnnPSLIAFSEI	patatin-like protein 1 [Cannabis sativa]	1731690710
IGNVSAVGSTAFLLGPVqqLGmMF	vesicle transport protein SFT2B [Cannabis sativa]	1731704072
IPMPIPYQSMMSMPVLGmSHGGHGqMGIPVGAPNGAVGYHG	transcription factor BOA [Cannabis sativa]	1731711980
ITEAqSVnPAAAIAVQPSH	COP1-interacting protein 7 [Cannabis sativa]	1731678381
KEDmENLVLDDSLNGNKSYSnYRSALSSISDSHHPLSAPVV	sorting nexin 2A [Cannabis sativa]	1731710319
KIqILDLSQNNLSGSIPSCFENFTSM	receptor-like protein EIX2 [Cannabis sativa]	1731728298
KSLGVGYnnKWnIDFDDNVPSGGKHLF	probable ubiquitin-like-specific protease 2A [Cannabis sativa]	1731712773
KSYTGNGGIFEVCWNKEGNKVAACFA	WD40 repeat-containing protein HOS15 [Cannabis sativa]	1731666392
LALPPTERDLPnqGVSITSTQISERMYmPQASRWDE	methylmalonate-semialdehyde dehydrogenase [acylating], mitochondrial [Cannabis sativa]	1731691740
LEEGWDDVPTLKIMSLEDMDAISM	uncharacterized protein LOC115701258 [Cannabis sativa]	1731746096
LEFLqAqCTVGRDSLIVDWTEKYLCmKCN	uncharacterized protein LOC115710278 isoform X2 [Cannabis sativa]	1731687803
LGGGGVHGVGVSMAKSCLMNAEQP	sphingoid long-chain bases kinase 2, mitochondrial [Cannabis sativa]	1731683332
LGSmmTmDRYAAAESFYKLAMAFAPVPDLH	guanine nucleotide exchange factor SPIKE 1 [Cannabis sativa]	1731687512
LmLKFCYSTGmTQITPTnITPLRCAAEFMEMK	BTB/POZ domain-containing protein At3g22104 isoform X1 [Cannabis sativa]	1731746237
LNQEVmqLGqSLYNQPGAGAGPGAAP	stromal 70 kDa heat shock-related protein, chloroplastic [Cannabis sativa]	1731730316
LPLLDSAIPDTGDDSLNVITSEGFq	dnaJ homolog subfamily C member 16 [Cannabis sativa]	1731685670
LRENnEmDMFSTESASIANYYYRATLDFD	G-type lectin S-receptor-like serine/threonine-protein kinase LECRK3 [Cannabis sativa]	1731717236
LSPAFMVSAAAFPEQnIVGGGFVPSVGGALYSHDY	probable cyclin-dependent serine/threonine-protein kinase DDB_G0292550 [Cannabis sativa]	1731689449
LSqVnALEPQIPGHHEnFGGV	uncharacterized protein LOC115695498 [Cannabis sativa]	1731733536
mYKTALEGRKGELADGEGERDDDLEVQ	brefeldin A-inhibited guanine nucleotide-exchange protein 2 [Cannabis sativa]	1731678628
NAFPGEPRLPNMVNDNRMSnVDIAnLDAPERPTETYSEYGPSISK	uncharacterized protein LOC115719280 [Cannabis sativa]	1731713096
NALGGGGGGGGGAGLFGAGLPEFEqVQQQLTQnPnMMREIm	ubiquitin domain-containing protein DSK2b isoform X2 [Cannabis sativa]	1731664237
nASFIFAFSTCYLDQWNSAQAPYLET	uncharacterized protein LOC115700078 [Cannabis sativa]	1731743587
NEHWLWMGDFNDILAKDERISqRVKTHPDTEFLqCVnDCQVEDV	uncharacterized protein LOC115710724 [Cannabis sativa]	1731688545
NGNLnFGGPLmFASSGHmEKGPTSInTLGKHGKGDITHAVSH	protein ALWAYS EARLY 2 isoform X3 [Cannabis sativa]	1731711930
NHMLQHQHQqQQPNSSSSPSPASGRAQQPLFPTESLHYSGLGMVmSD	squamosa promoter-binding-like protein 16 [Cannabis sativa]	1731698080
NIATIASGSKEAEKNNnGGEESSSKPVYqGSqT	mechanosensitive ion channel protein 8 isoform X4 [Cannabis sativa]	1731667305
NITGPnSALFDPTSDInTIYGLN	class V chitinase CHIT5b [Cannabis sativa]	1731728681
NKVVDANVKGVEDGKYGGYPGqGSYNnGGGqGSY	glycine-rich protein [Cannabis sativa]	1731683555
NNNAmSSSAAPYGEELIAPSPYINGA	ammonium transporter 2 [Cannabis sativa]	1731736390
nPMVLQMPSVNSSSSSLIAPFNCNCRMmIVHPNNCSH	nicotianamine synthase-like [Cannabis sativa]	1731718152
NQGFmSRFNAETGTPmRPGPmDVY	glucan endo-1,3-beta-glucosidase 5 [Cannabis sativa]	1731669191
NqGHQYNTPNQSQAQPnMPYPQQQRKPSLEDTLQQFmQTTQQ	uncharacterized protein LOC115720316 [Cannabis sativa]	1731716656
NqqGYRPRGPPGPQWGPRGHMAHPSSFD	far upstream element-binding protein 2 isoform X3 [Cannabis sativa]	1731668971
nRTVSTTATEPVSYDmLGGQMHTREFVAPDInENGPVDNYGFAEQQ	nuclear transport factor 2 [Cannabis sativa]	1731724110
NVRLGLAADGFnPFGnMSLSYSmWPVVLVnY	uncharacterized protein LOC115704039 [Cannabis sativa]	1731673531
PAGSYGNPNAPNPGYLSGGPGAmKNnWAS	heterogeneous nuclear ribonucleoprotein 1 [Cannabis sativa]	1731695089
PATSPVNNTRRnSTDnKGPmSSTTPVTnHAVPAV	LOW QUALITY PROTEIN: receptor-like serine/threonine-protein kinase ALE2 [Cannabis sativa]	1731674164
PIDDSLSSQCFTPNSICYTTNNNInADEIPTIDYSVL	1-aminocyclopropane-1-carboxylate oxidase [Cannabis sativa]	1731746785
PLSSNFEmTLSANAIQQLEILQNnSDGSESG	DNA mismatch repair protein MSH3 [Cannabis sativa]	1731706472
PMSQPLPSqqLHGSNGLQSIPQP	flowering time control protein FCA isoform X3 [Cannabis sativa]	1731728320
PNDFPCSQSVmYVLLELLGSSLMDLA	loganic acid O-methyltransferase-like [Cannabis sativa]	1731725784
PqAqTQTPLQFSSNWSSSSRFPHSSSNVDFSAGQRNNGNNTTTTTTSS	uncharacterized protein DDB_G0283357 [Cannabis sativa]	1731690782
PSPFTqPMSPSANGMSHSSMAWPqPNVPTLHLPGSN	zinc finger CCCH domain-containing protein 30 [Cannabis sativa]	1731690438
PSQPGDVPFqGTASAqSYGqSVPPQQPYPYASSGQAY	far upstream element-binding protein 2 isoform X3 [Cannabis sativa]	1731668971
PVCEEMDSYSPKVDAGDEIPLDSGEVLASSGEPEVINEE	kinesin-related protein 4 [Cannabis sativa]	1731723907
PVQMAVQVLYFEQIRLRNAMNGGHnQFFFGAmnGQYP	BTB/POZ domain-containing protein At1g03010 isoform X3 [Cannabis sativa]	1731663879
QCDmFNLSYRGLLnCGnSCYAnAVLQCLTSTKPLIIYLLRKSHSRSCCG	ubiquitin carboxyl-terminal hydrolase 15 isoform X2 [Cannabis sativa]	1731679502
QDAGPmAHPVRPHSYIKMDN	puromycin-sensitive aminopeptidase isoform X3 [Cannabis sativa]	1731738474
QEEEAAGGGGVGSPPGIGGAPQQGGGAGmQ	AT-hook motif nuclear-localized protein 19 [Cannabis sativa]	1731711505
QEYNSGRNGPRGmKELFnYRHSSP	protein ALP1-like [Cannabis sativa]	1731693534
QGASEGAPGAPTPLAP	uncharacterized protein LOC115720168 [Cannabis sativa]	1731716275
QGMEALQQSLVETLSSATLGPAGSGNVADYMGq	transcription factor TGA2.2 isoform X2 [Cannabis sativa]	1731740321
qKFHPQmVQFHPLHFFSS	glycosylphosphatidylinositol anchor attachment 1 protein [Cannabis sativa]	1731740148
QKLGGIGDGGGQQINNEEEELVADDQILENNNASSSAAGGFF	wall-associated receptor kinase-like 1 [Cannabis sativa]	1731712369
QMSTnSISTCPnEGQHCIQHSTHPHLLLLFD	uncharacterized protein LOC115718702 [Cannabis sativa]	1731711111
QQQqqLPSqQQQQQLVDHQ	auxin response factor 6 [Cannabis sativa]	1731738349
QSCVVPDPYANGMDSSKLYHDNMQETMVQPVTqqSSAPIINQPIPDS	protein HUA2-LIKE 2 [Cannabis sativa]	1731667649
RCGRMDMHIFmSYCSFSSLKILLKNYLGYNEEEEDNKANDV	AAA-ATPase At5g57480 [Cannabis sativa]	1731734176
RGSNSRCMASSLVRTGFVRGSVTqGnGCYqH	uncharacterized protein LOC115700406 [Cannabis sativa]	1731670049
RLSEnSVSPMTIVnPPPVQEMKSEDETQPSAPNTSANNNGHTNLEMQ	cell number regulator 6-like [Cannabis sativa]	1731683495
SGEGIYFAAKSGRmCAEAIVEGSEnGKRmVD	geranylgeranyl diphosphate reductase, chloroplastic [Cannabis sativa]	1731684775
SLPQPNSDDALLSSWTRCnQMVmSWImHSISQEIKSSIMYLET	uncharacterized protein LOC115717740 [Cannabis sativa]	1731708636
SnGYVVSGPCKIIGHqILn	uncharacterized protein LOC115716564 [Cannabis sativa]	1731705943
SNPSqAFGLPNLQINNEIPTTSQQmNQ	ETHYLENE INSENSITIVE 3-like 1 protein [Cannabis sativa]	1731666434
SQSSGPQFRPMIPNqQGQPFLPSASQQFQPVGQGmPHPNLGMSG	pre-mRNA-processing protein 40A isoform X2 [Cannabis sativa]	1731669013
SSnVmLFGnLGnLRQQQQQPNGSVLDHH	inactive TPR repeat-containing thioredoxin TTL3 [Cannabis sativa]	1731710204
SVVVPPTFNTTTTAnTSP	ethylene-responsive transcription factor ERN2-like [Cannabis sativa]	1731680786
TFYSVSSSDLVSKWMGESEKLVSNLFqmARDSAPSIIFVDEIDSLCGqRGEGNESE	protein SUPPRESSOR OF K(+) TRANSPORT GROWTH DEFECT 1 [Cannabis sativa]	1731712080
TGNIDLMPGLLEYAPGSGnMSFFYnCTKHGGNSVEIGDFSCPNGSIFK	LEAF RUST 10 DISEASE-RESISTANCE LOCUS RECEPTOR-LIKE PROTEIN KINASE-like 2.4 [Cannabis sativa]	1731733598
VGCIPSKALLHSSHMYHEAmHSFANHGVKFASVEIDLPAmMGQ	dihydrolipoyl dehydrogenase, mitochondrial [Cannabis sativa]	1731724836
VIFEEFNHHRHHRNSNAEEDqLDTRmNLEGPSFLnPDDFRCPI	U-box domain-containing protein 19 [Cannabis sativa]	1731686128
VNHPCQPLHHKIEISIINNNnnNNNPNTPKDHNTPE	uncharacterized protein LOC115721058 [Cannabis sativa]	1731719032
VQPTSnYSnAGnAAWRPSGFQQPNVVPGPGAQHmMPPVGP	LOW QUALITY PROTEIN: actin cytoskeleton-regulatory complex protein PAN1-like [Cannabis sativa]	1731671601
VSDELADKPIAPVDMMQNSESITLGqAqNESSGFVGLVDDSDMAGAKAEAE	late embryogenesis abundant protein D-34-like [Cannabis sativa]	1731725522
VSHVQQSSPMTSVqQIPHmQQPY	glutenin, low molecular weight subunit-like [Cannabis sativa]	1731732941
VSRESGNPFVEqAVqYSVAAAYA	phosphomevalonate kinase, peroxisomal [Cannabis sativa]	1731706088
WPIHSPPGVMPGYqPYPMqGMPYYQnYPGSPYFQSPYPAAEDPRL	COP1-interacting protein 7 [Cannabis sativa]	1731722054
YCVSLGGGGGGGATATAPAPPPLPSPAEqL	rho GTPase-activating protein REN1 isoform X3 [Cannabis sativa]	1731667763
YFYEGLTSRECQFVEmMCNGEFLQKEPEEALEFLI	uncharacterized protein LOC115704442 [Cannabis sativa]	1731674176
YLLFGDEEYLFIFQEAYAAAmHYLYnDPWYVEVnMDSAALVW	alpha-mannosidase I MNS4 [Cannabis sativa]	1731722655
YNKLMKAYSSHGqHSqCLSLYSRmCFL	pentatricopeptide repeat-containing protein At5g08510 [Cannabis sativa]	1731676414
YPmVPGHEVVGEVVEVGSEVTKFKVGDIVGAGCIVGSCKHCQPCKSDnEQYCnKKI	cinnamyl alcohol dehydrogenase 1 [Cannabis sativa]	1731693268
YPPGYIPRDSLDVRnDILDWHGDHLHTnFHImFNmLRDAGYY	subtilisin-like protease SBT6.1 [Cannabis sativa]	1731680812
AAANnGLPNKDLHM	auxin efflux carrier component 2 [Cannabis sativa]	1731727901
AADPRHGRYLTASAMFRGKMSTKEVDEqmINVqNKnSSY	tubulin beta-8 chain [Cannabis sativa]	1731737825
AADPRHGRYLTASAMFRGKMSTKEVDEQMMNVQnKNSSY	tubulin beta-2 chain [Cannabis sativa]	1731707794
AAnPPTPPKPPQKPQSFSFHDQTWEDPYS	uncharacterized protein LOC115711921 [Cannabis sativa]	1731690622
AAPqIGnTEIPPEDnYTWRKYG	WRKY transcription factor 55 [Cannabis sativa]	1731680843
AASAGHGFASYVKnVRImDYSmSFTQWVGTWADEEY	uncharacterized protein LOC115715030 [Cannabis sativa]	1731667463
AASGPnnLVSHVD	trihelix transcription factor GTL2 [Cannabis sativa]	1731713163
AAVnMILDPREGERnTIAMARqY	multisubstrate pseudouridine synthase 7 [Cannabis sativa]	1731712489
ACSRCVARAVSqLGTLCTDSCGGALQLEGCFVKYDnTSF	plasmodesmata-located protein 6 [Cannabis sativa]	1731695456
ADGANLDLTLPLEPNVDEEnASCMQADGAnLDLTLPLEPnVDVENA	sister chromatid cohesion 1 protein 4 isoform X1 [Cannabis sativa]	1731739856
ADHILVMqnGKIAQAGTF	putative ABC transporter C family member 15 [Cannabis sativa]	1731663041
ADIInRAnLGmEVmHERNAHN	PS II protein D1 (chloroplast) [Cannabis sativa]	836692050
ADInGDGVLDHVQAVGGnGAEQTVVSGSmEV	uncharacterized protein LOC115712450 [Cannabis sativa]	1731691806
ADNFLPPGRqGPEnAAFAEG	uncharacterized protein LOC115725733 [Cannabis sativa]	1731731858
ADNSmSLYHRPqERLGSFSSTGSKMAGWqLYRTP	DENN domain and WD repeat-containing protein SCD1 isoform X2 [Cannabis sativa]	1731685586
ADTAREELPSTmAAVRLSGME	uncharacterized protein LOC115714962 [Cannabis sativa]	1731697381
ADTNTNTNNNNRGFGRGNWGRGNAQNMGnRGPVGPmRn	cleavage and polyadenylation specificity factor subunit CG7185 [Cannabis sativa]	1731732050
AEAAAAVSGKWPGNNNNnKEELnPqDSWLPIT	lysine histidine transporter-like 7 [Cannabis sativa]	1731664143
AEGLLqSSNEKRVEEVGEEYFEDLISmSFFqPSNKYYEMESTFLM	putative disease resistance RPP13-like protein 1 [Cannabis sativa]	1731685802
AEGTPLISIHSHHKGCWqCYKGDGESK	protein LURP-one-related 7 isoform X4 [Cannabis sativa]	1731718750
AENSLSHSnVLNSHDSTVLNSGSELFSPLSTDGmVQAESKMQNDKKE	fluoride export protein 2 isoform X2 [Cannabis sativa]	1731677453
AEVFLHQVDSAAVFHnASTRF	LOW QUALITY PROTEIN: delta-1-pyrroline-5-carboxylate synthase-like [Cannabis sativa]	1731675633
AEVVHMRMTQFSPTSNHNHHHHN	LOB domain-containing protein 4 [Cannabis sativa]	1731684469
AFFDDFQNSMLKMGALGVLTGSnGEIRRnC	peroxidase 40 isoform X2 [Cannabis sativa]	1731724281
AFnSHESPNIRSPPPEKmmENGQPLDASDKEPSIIRQDSFEm	ABC transporter B family member 6 [Cannabis sativa]	1731678647
AFWSCWHRSYVNIIPSSHqSFHKWFqDVMKDNNPTQIEEALMVTW	uncharacterized protein LOC115696648 [Cannabis sativa]	1731735592
AGASKTqSPSPISSASSTqTGKDYDFSSL	ADP-ribosylation factor GTPase-activating protein AGD5 isoform X2 [Cannabis sativa]	1731728920
AGGAYNSGRNLVTNAFVFSFWYLDqLGMAAS	heparanase-like protein 3 [Cannabis sativa]	1731669573
AGHSVDmqLRDPFSFQEVNIVPYGIGSDDT	uncharacterized protein LOC115705226 [Cannabis sativa]	1731664853
AGRGYEYDVHASFSNLKDDCCHSqSIAGLTLSEVFCVS	gamma-tubulin complex component 5 [Cannabis sativa]	1731736360
AHFHELHALANALLEHETLTGSqInA	ATP-dependent zinc metalloprotease FTSH 4, mitochondrial [Cannabis sativa]	1731665279
AHnVAKWAFAHHMFGSIPVSMLP	uncharacterized protein LOC115710786 [Cannabis sativa]	1731688637
AHSFKRNTSNNSQNSnIInNGGSSIGNNGGGGHV	O-fucosyltransferase 35 isoform X2 [Cannabis sativa]	1731676755
AIDAIqALDGKnGWRVELSH	serine/arginine-rich splicing factor RSZ21 [Cannabis sativa]	1731694867
AIGGKPPYLMPSFGMFGYGGSFAS	structural maintenance of chromosomes flexible hinge domain-containing protein GMI1-like [Cannabis sativa]	1731708158
AIVLDTFmDVADFKAPFRYLDAWnMDEGCKGVIqQAWAQVFnGY	uncharacterized protein LOC115711018 [Cannabis sativa]	1731689000
AKLLDESSSMSSSAIVGTTGFIAPEnAFATTMSTEADVYSYGVV	receptor-like protein kinase [Cannabis sativa]	1731695761
AKPRRCFVDSQVVDFVYDSSSGLVTLSLDSMPEED	probable galactinol--sucrose galactosyltransferase 6 isoform X2 [Cannabis sativa]	1731728596
AKTnGMFVFGSSLVDNGNNNFFENRAKAD	GDSL esterase/lipase At1g29670-like [Cannabis sativa]	1731670791
AKTQHVQAHDHMmSHMEKMDPNLMIFFTTND	BURP domain-containing protein BNM2A [Cannabis sativa]	1731682613
ALDImVHDqGLHFSPRKIT	uncharacterized protein LOC115712546 [Cannabis sativa]	1731692030
ALDPLqKDTEVPSHELMGIPqnGAALP	serine/threonine-protein kinase BSK7 [Cannabis sativa]	1731705074
ALRETCNANEFLRCIHVGLLCVqEDPEDRPTmSNAVFmLG	G-type lectin S-receptor-like serine/threonine-protein kinase At4g03230 [Cannabis sativa]	1731743913
ALSPGGSCSnITWPGnISYAFnSY	glucan endo-1,3-beta-glucosidase 9 [Cannabis sativa]	1731720065
ALVQCTPDLPqQQCINCLDYVYSRIPNCCSGRVGGR	putative receptor-like protein kinase At4g00960 isoform X4 [Cannabis sativa]	1731681463
ALVSGNWTHHWVYWVGP	aquaporin TIP4-1 [Cannabis sativa]	1731665042
AMETAVSRQHPFVmVESDSESVIKnLKGGESLWGLEnYTRQCNLLSTLMVCCHFS	uncharacterized protein LOC115700100 [Cannabis sativa]	1731743627
AMIAnGqDTEVAAIDVSIGnIYmSLCRFDEAIFSY	protein KINESIN LIGHT CHAIN-RELATED 1 [Cannabis sativa]	1731704294
AMMFENKDRHHHDQDGGITQLFAQKFFPLSSSSnnLSL	transcription factor TCP5 [Cannabis sativa]	1731684748
AMSCFRLSKSLINQIEVMmNKFWWDSNSSGSGIHWKTWSLLCA	uncharacterized protein LOC115703751 [Cannabis sativa]	1731673042
AnAGPnTNGSQFFITLAPCPS	peptidyl-prolyl cis-trans isomerase CYP18-2 [Cannabis sativa]	1731745774
ANAIIDALCGHLAQLGGGSDYE	RNA demethylase ALKBH10B isoform X2 [Cannabis sativa]	1731664345
ANAYFSLFMAVGnILGFATGSY	sucrose transport protein SUC4 [Cannabis sativa]	1731714454
ANDLKNRPqGTLPSDTEnPRRYG	uncharacterized protein LOC115713509 [Cannabis sativa]	1731694094
ANIHVYPDWTAMQAYYGPRVALPqYYNAAVASGHA	common plant regulatory factor 1 isoform X2 [Cannabis sativa]	1731686589
AnLSIADESPALEDFSGEGMV	protein transport protein SEC16B homolog [Cannabis sativa]	1731704580
ANNSELSSGGGEFMDEEALLNMPnLLVNmAEGMLVSPPR	ethylene-responsive transcription factor ERF027 [Cannabis sativa]	1731707176
ANNTPPQSQQVLSNnDM	NAC domain-containing protein 17 isoform X1 [Cannabis sativa]	1731666724
ANPNVInGAmVAGPDKHDGFRDVRSnYnYT	endoglucanase 25 [Cannabis sativa]	1731694975
ANqLPTSQGAEVISSNSCERPNHQVSSYKGRSVLNnQCGF	transcription factor LHW isoform X2 [Cannabis sativa]	1731720091
AnREVPEAVAAQVISMnRCGIKTSS	protein FAR1-RELATED SEQUENCE 5-like [Cannabis sativa]	1731743617
AnTIKVNIDAAIFDSNGTYS	uncharacterized protein LOC115719802 [Cannabis sativa]	1731715383
ANVLANIVVnPqHE	uncharacterized protein LOC115724609 isoform X2 [Cannabis sativa]	1731727719
AnVTMFQIQTNLGGCFTVD	uncharacterized protein LOC115720341 [Cannabis sativa]	1731668075
ANVTTmAEEQSSSHKTIKRFDSFDIESRTYLGHGSHG	potassium transporter 5-like [Cannabis sativa]	1731687063
APGDNAFnVTLDLDVSVGVPG	probable linoleate 9S-lipoxygenase 5 isoform X2 [Cannabis sativa]	1731719325
APKSDTHSSVTAAGDSSSTSVDPLFHA	oligosaccharyltransferase complex subunit OSTC [Cannabis sativa]	1731731108
APLSDDVSRLSSqIRSm	uncharacterized protein LOC115716694 [Cannabis sativa]	1731706261
APPTNVqMALMAqqHQEQQ	putative clathrin assembly protein At5g57200 [Cannabis sativa]	1731727798
APQPGYGSGYGAPqAKPPSNAPVY	spidroin-2 [Cannabis sativa]	1731665333
AQESVSHWNqNWHHqRAFRDPPIQ	la-related protein 1A isoform X4 [Cannabis sativa]	1731714593
AQQPqqYSqQPHQPYMMmPPPPPQAAQAPPMWAGQPQGPPQQTQP	polyadenylate-binding protein RBP45 [Cannabis sativa]	1731682237
AQVGSANWGFmSRnHGAVWDTSRVPAG	expansin-like A1 isoform X2 [Cannabis sativa]	1731664161
ARAYqTAmnAAFDnTTTTAILEYKAASCKK	laccase-13 [Cannabis sativa]	1731714628
ARDHLMmRNVKPGAINmFDRLYMS	anthocyanidin 3-O-glucoside 2''-O-glucosyltransferase-like [Cannabis sativa]	1731729185
ARGHnLVEELRDSTAHAEmICIREASn	tRNA(adenine(34)) deaminase, chloroplastic [Cannabis sativa]	1731743939
ARnRKYKQQGGAPGnNAPNPPPQPQGGQ	uncharacterized protein LOC115713162 [Cannabis sativa]	1731693536
ARSGDMERAVDLFGLMPERNVVSWTTmISGYSQnG	pentatricopeptide repeat-containing protein At5g08510 [Cannabis sativa]	1731676414
ARSSVLSQPSVSGFRmnnTEAGNFSSWFHTGN	uncharacterized protein LOC115709403 [Cannabis sativa]	1731685623
ASGLSNFGSAMSKSVTGLmGYEGLEVInPEGGTEDVEEEATKG	oxysterol-binding protein-related protein 3A [Cannabis sativa]	1731737103
ASHGGPIGSYVESTPFHGRSRPTGLSLHQWFHTTIG	uncharacterized protein LOC115720087 [Cannabis sativa]	1731716078
ASIKGYHLDGnTEMVAmGFmNVAGSLTSCYVATGSFSRTAVNFSAGCET	low affinity sulfate transporter 3 [Cannabis sativa]	1731670414
ASIRNPRPWPIPGDALQmQWELNWYKY	ankyrin repeat-containing protein ITN1 [Cannabis sativa]	1731721226
ASSInLDGSHGYDnDAKSSCGDGGGQIGLEGS	transcription factor bHLH143 [Cannabis sativa]	1731730788
ATEGNQFLYNTSIRVFC	probable glycosyltransferase At5g25310 [Cannabis sativa]	1731740772
ATGQDPAQNIESSHCITmmEAInNGKDLH	3-hydroxy-3-methylglutaryl-coenzyme A reductase 1 [Cannabis sativa]	1731666563
ATTGATYqRLVNmIFTDLIGETmEVSEC	uncharacterized protein LOC115694986 [Cannabis sativa]	1731732689
AVASESPNGPGFKLDGHTIKW	LOW QUALITY PROTEIN: primary amine oxidase-like [Cannabis sativa]	1731674277
AVEVLWTPQDVKDmLSED	uncharacterized protein LOC115721717 [Cannabis sativa]	1731720591
AVEVNSHNSTPNLKFIEGDm	uncharacterized protein LOC115723917 [Cannabis sativa]	1731725726
AVGGENVEGESSMDAEAVKQAVMM	uncharacterized protein LOC115704602 isoform X2 [Cannabis sativa]	1731674427
AVLDELEKNLHLSDWHMEPSRMTLHRFGnTSSSS	3-ketoacyl-CoA synthase 11 [Cannabis sativa]	1731670475
AVLEAFEDmGLnVLEARVSCADSFHLqAVGGEnVEGE	uncharacterized protein LOC115704602 isoform X2 [Cannabis sativa]	1731674427
AVLSNGFKNnqAFKDCS	serine racemase [Cannabis sativa]	1731704877
AVNPPGGVWqqTNnTTQA	ankyrin repeat-containing protein BDA1-like [Cannabis sativa]	1731680692
AVVIEDHGLEnEVPLG	bifunctional dethiobiotin synthetase/7,8-diamino-pelargonic acid aminotransferase, mitochondrial [Cannabis sativa]	1731734222
AWNMKRLmRmVRNGALTTLDEqImDSTHG	mechanosensitive ion channel protein 6 [Cannabis sativa]	1731663791
AYFRASDVDGAKGAFLEmDEKGCSPnGVTYnMMISGLCRAVLVGEAVEMKK	pentatricopeptide repeat-containing protein At5g61990, mitochondrial-like [Cannabis sativa]	1731668065
CCGSIDATHIIMTLPAVqTSD	protein ANTAGONIST OF LIKE HETEROCHROMATIN PROTEIN 1 [Cannabis sativa]	1731664531
CEEWFSRICDPmmNAGLALqCHDATIqYCTLRLQELRNVVALS	uncharacterized protein LOC115703195 [Cannabis sativa]	1731672373
CFCPNGTQSSTCVVQPKGIEAQGRHNL	rust resistance kinase Lr10 isoform X2 [Cannabis sativa]	1731691142
CGIPLLTKCPnEEETTTYD	receptor-like protein EIX2 [Cannabis sativa]	1731675267
CGLmqIQEAVVDSMYLGLPSIVGRnKnAVLGF	uncharacterized protein LOC115717516 [Cannabis sativa]	1731708246
CHMGCGSVFqYPLLnHVTqFSSKIY	uncharacterized protein LOC115705898 isoform X2 [Cannabis sativa]	1731677436
CIHVGLLCVqQnPMDRPSMPSVVm	G-type lectin S-receptor-like serine/threonine-protein kinase At4g27290 [Cannabis sativa]	1731728933
CILVImTVCPIWAGqELHTLINRNMD	aluminum-activated malate transporter 10 [Cannabis sativa]	1731706907
CIRENPGCVFIATnRDSVGHMTnLqEWPGAGCMVAA	phosphoglycolate phosphatase 2 [Cannabis sativa]	1731680922
CLDESYSIVMnAmCnHRCVEEASHLFGRMLSSGKKP	pentatricopeptide repeat-containing protein At1g05670, mitochondrial-like [Cannabis sativa]	1731720639
CmYWEKGFPRLLSNEqLqELMWKGCPLVGLCDITCDI	uncharacterized protein LOC115717026 isoform X1 [Cannabis sativa]	1731707110
CNSFRKSnGELRKqKRELQDYCS	golgin subfamily B member 1 [Cannabis sativa]	1731720964
CPnAQSmKSSVRALDDFPCVSIPSnARDSNYQ	DNA polymerase epsilon catalytic subunit A isoform X3 [Cannabis sativa]	1731713293
CREELDKLGmIVPWCSQMEVLSNGSVGCFVTHCGWnSTLEGLTSGVP	UDP-glycosyltransferase 75C1 [Cannabis sativa]	1731722267
CRTGADSRKGDDLSQTTESSSRFSDTNNNNNNDIRID	RING-H2 finger protein ATL3-like isoform X2 [Cannabis sativa]	1731717989
CSFAVSCWNLSDVASHnLCLVEFSSWVSSLVDTQP	uncharacterized protein LOC115725155 [Cannabis sativa]	1731729943
CSLSHCKDGLIDAVmGSTGITISNNLFSHHnEVmLLGHSDDYTPDSG	probable pectate lyase 12 [Cannabis sativa]	1731688583
CSSSPDVNTRKALANALSVAPSMWTLGNAGmG	senescence-associated protein AAF, chlorolplastic isoform X1 [Cannabis sativa]	1731741705
CTCGLFQImKFSCPHACAVAQqRSISmYALCSPYYTIEYWRST	uncharacterized protein LOC115717985 [Cannabis sativa]	1731709054
CTLSqSSPELRLFLNDLFNNDFnnIFAS	jasmonate O-methyltransferase [Cannabis sativa]	1731670209
CVHAAACINVTRAnINDSCSEYFTTEMWRKTYEPMIHPIPDESmW	uncharacterized protein LOC115696469 [Cannabis sativa]	1731735292
CWKTVSAEGCRACLDKASVEAKKC	cysteine-rich receptor-like protein kinase 42 isoform X2 [Cannabis sativa]	1731742724
CWNLASPTVISGSPIDFGSWFMGVLDTqS	uncharacterized protein LOC115704350 [Cannabis sativa]	1731674027
CYQNCPnIVDLYFnLAAGEGVFLPDLC	uncharacterized protein LOC115697853 [Cannabis sativa]	1731738414
DADDAARAVDGLnGKTFDEKEWY	polyadenylate-binding protein 3-like [Cannabis sativa]	1731705730
DAGIYSCnGLMMHTKKHL	meiotic recombination protein DMC1 homolog [Cannabis sativa]	1731722533
DAKLNNVTNGGSTDLDSFGVSKIG	glutamate receptor 2.7-like [Cannabis sativa]	1731667849
DALAEEnNKVNQGLMNNNNMNmGPNLLSQQTQmPDLMPSMPLTTNT	zinc finger protein GAI-ASSOCIATED FACTOR 1 [Cannabis sativa]	1731663904
DALVSCPSSEEIKRALFAmPnHKAPGPDGmSVLFYKHYWESVGADFCDAVS	uncharacterized protein LOC115718779 [Cannabis sativa]	1731667855
DAnqAAHGLAKqALVLDDDCmWFEEIPSTIFSV	uncharacterized protein LOC115699967 [Cannabis sativa]	1731743396
DAQPQTPAMPPQmAPHPAmQQGGYFTqHPQAAAMMQQSGI	GRF1-interacting factor 3 [Cannabis sativa]	1731734055
DATVqmVGLPPWRFTGI	uncharacterized protein LOC115699954 [Cannabis sativa]	1731743376
DCAVVCLFLDSDTNNLSVAAnTRPKEDGVnCAAEKEED	probable protein phosphatase 2C 33 [Cannabis sativa]	1731712047
DCDSLNGNKRMSWANATSVFNNCKPDTK	cyclic nucleotide-gated ion channel 17 [Cannabis sativa]	1731731477
DCISEQFTKASLMRKKAMEIVFWNDEmGQWFDYWLnKnS	probable trehalase isoform X3 [Cannabis sativa]	1731702904
DDAALAEDNNNNNNNNNIInITTNNNAH	zinc finger protein BRUTUS-like At1g18910 [Cannabis sativa]	1731688721
DDALSDLSNILGDLKNmAVDM	putative SNAP25 homologous protein SNAP30 [Cannabis sativa]	1731740601
DEFDLKSLDmEKGNQESTSPRGVLDAFDPTTnKYSGENSKLmKFS	receptor-like cytosolic serine/threonine-protein kinase RBK2 isoform X4 [Cannabis sativa]	1731710423
DEGFEPDVVTYGImInAFCKARK	pentatricopeptide repeat-containing protein At1g71060, mitochondrial [Cannabis sativa]	1731691463
DEKVIESKGEEKDDDDDGGCGGGGRSGWRDRIISTTmSFGnY	serine/threonine-protein kinase RIPK [Cannabis sativa]	1731665040
DELSSLITKEEQNHFCY	LOW QUALITY PROTEIN: cyclin-D3-3-like [Cannabis sativa]	1731671313
DEMIERnEVSWnAAITSLTYIGHSHKALDVFRSmInS	pentatricopeptide repeat-containing protein At4g14170 [Cannabis sativa]	1731692285
DERQICDIVnnHVAEMGSKCPRIYTFGIGSFCN	uncharacterized protein LOC115725393 [Cannabis sativa]	1731730958
DEVqDLTmSQITLFKHICGNVEEGFVFSGDTAQ	LOW QUALITY PROTEIN: TPR and ankyrin repeat-containing protein 1-like [Cannabis sativa]	1731725666
DGFFSNFEIPASFDLSSSAnLnVASPTGSGK	transcription factor bHLH80 [Cannabis sativa]	1731670570
DGFmAVLQSGVVNARELLSSCS	WPP domain-interacting tail-anchored protein 1 [Cannabis sativa]	1731742411
DGHLLGLAQSYAKNmGLYGqRVGCLS	aspartate aminotransferase, mitochondrial [Cannabis sativa]	1731742757
DGKqLDYYTSRPSLnAVTWSSmET	uncharacterized protein LOC115717205 [Cannabis sativa]	1731707560
DGLLPKNInIYATT	vacuolar-processing enzyme gamma-isozyme [Cannabis sativa]	1731691502
DGLTPLPVAVKVHDGDNSHQGH	probable serine/threonine-protein kinase PBL16 [Cannabis sativa]	1731733875
DGnEDNSTVNGSVTSVRSVRDAVTPLAHMAYS	zinc finger CCCH domain-containing protein 24 [Cannabis sativa]	1731713646
DGSILIMSKAGTGTAMFSmGIFMAMQEK	auxin efflux carrier component 5 [Cannabis sativa]	1731711467
DGSLFTFMIAnENNQHLPPHP	uncharacterized protein LOC115720827 [Cannabis sativa]	1731718147
DIKPVqFELSTSDGqQASCQFCLDEKEHDEINGNHK	F-box protein PP2-A15 [Cannabis sativa]	1731687033
DISPPSSLTQDSNDYSKENTInNKQE	uncharacterized protein At4g04980 [Cannabis sativa]	1731740407
DKDALGYnHLISLYASLGnKEQMm	pentatricopeptide repeat-containing protein At4g21705, mitochondrial [Cannabis sativa]	1731681533
DKDAmFSGnFmFTPLKnVKAKPI	ubiquinol-cytochrome-c reductase complex assembly factor 1-like isoform X1 [Cannabis sativa]	1731679273
DLDSSTPnNPPDLNTSTL	protein SAWADEE HOMEODOMAIN HOMOLOG 1 [Cannabis sativa]	1731691022
DLGGSKGSTKSRSSYSIqSqTENKQFSS	protein IQ-DOMAIN 14 [Cannabis sativa]	1731723282
DLNRTVPCAYAYNTMIMGYSSAGKFDqAYSLLERQK	pentatricopeptide repeat-containing protein At3g06920 [Cannabis sativa]	1731724942
DLnSSTPnNPPDLNTSTL	protein SAWADEE HOMEODOMAIN HOMOLOG 1-like [Cannabis sativa]	1731690850
DLQNRMSGSSmTGPSSSSGIPVQmVQSSEHAIGAEWENSnSSSISLDMK	uncharacterized protein LOC115723459 isoform X2 [Cannabis sativa]	1731724948
DLRKGEVMMTLqGHQDMITGMSLSPDGSYLLTNGmDCKLCIWDMR	U5 small nuclear ribonucleoprotein 40 kDa protein [Cannabis sativa]	1731682936
DLSYNNFAGSIPSWVNDqqNLQIN	probable LRR receptor-like serine/threonine-protein kinase At1g56140 [Cannabis sativa]	1731686042
DMFRRYESFSMGPSGLGnSRqEKQnIK	kinesin-related protein 4 [Cannabis sativa]	1731723907
DNEVESSINAnPnSISGSSSGFGnGKREGVKRAA	transcription factor RF2a [Cannabis sativa]	1731670337
DnHSFIHETIDEKHDKIACGPPTDFSn	cysteine-rich receptor-like protein kinase 42 isoform X2 [Cannabis sativa]	1731684998
DNRQLLIENDGPEVDNILK	uncharacterized protein LOC115701332 [Cannabis sativa]	1731746258
DPDVYAYNALMSGmVRAGmVDEAHSLLKTMEENGCIPDLNSHNIILn	pentatricopeptide repeat-containing protein At3g16010 [Cannabis sativa]	1731712284
DPEAVInqALQTGGGPnVSDAYT	laccase-17 [Cannabis sativa]	1731732152
DPKNERSHSQTFSRPHSHSG	ABC transporter B family member 6 [Cannabis sativa]	1731678647
DPLIqGHSTFLPIFYSGPSH	uncharacterized protein LOC115696647 [Cannabis sativa]	1731735590
DPSSKLnRSqRGTSSEGIH	polyadenylation and cleavage factor homolog 4 [Cannabis sativa]	1731690057
DQENQLFGAYNGEELSSIAGYG	uncharacterized protein LOC115707268 [Cannabis sativa]	1731680991
DqKGSGGDCSAGGGGGGGGGGGGGTISEDGYNWRKYGqKQVKGS	probable WRKY transcription factor 2 [Cannabis sativa]	1731729781
DQPISWLGETNLALGTPQAAE	tRNA A64-2'-O-ribosylphosphate transferase [Cannabis sativa]	1731680671
DRLFWTVEANGMYLSRVHMSFKQN	uncharacterized protein LOC115717595 [Cannabis sativa]	1731708381
DSLGDDLIVEIqDSKGKH	uncharacterized protein LOC115711246 isoform X2 [Cannabis sativa]	1731666438
DSYnDKLmTKSDVLmmTQCQGGKERSKQEFQALASGAGFSGIRLEC	caffeic acid 3-O-methyltransferase [Cannabis sativa]	1731683463
DTKMFSnDFnPSFSVSSLSTqKAEQLmDLKEDMIFA	helicase-like transcription factor CHR28 [Cannabis sativa]	1731737518
DVFLNMVLISVGVAVSSYGEIHFNmT	probable sugar phosphate/phosphate translocator At1g48230 [Cannabis sativa]	1731663581
DVKAANILLnEnFQ	LRR receptor-like serine/threonine-protein kinase IOS1 [Cannabis sativa]	1731672861
DVYmGSqLESPTmLFSLDS	paired amphipathic helix protein Sin3-like 1 [Cannabis sativa]	1731736506
DWCSnSSTGSLVTIQLPPDLEHNNMWMGLALCIVFEVQT	uncharacterized protein LOC115714958 isoform X2 [Cannabis sativa]	1731697371
DYSSSVSSGMDSEKSSKRKRWSYDDSLDNIDIRIDELHnDSEKQ	protein SHORTAGE IN CHIASMATA 1 isoform X2 [Cannabis sativa]	1731706229
EAAHLMASNPLPEDGGHK	oxalate--CoA ligase [Cannabis sativa]	1731704555
EAANDDLLGImMESNFKEIKEHGNnKnVGMSIRDVIEECKLFYFAGQE	cytochrome P450 CYP72A219 [Cannabis sativa]	1731679576
EAEmLPPHEIVARSSTQSPMLAY	uncharacterized protein LOC115718506 [Cannabis sativa]	1731710108
EAFGEDAVLIHSnGQLVPTDDWGVT	WUSCHEL-related homeobox 9 [Cannabis sativa]	1731736590
EAGGHYnLGVmYFKGIGVKRDVKAACq	LOW QUALITY PROTEIN: ERAD-associated E3 ubiquitin-protein ligase component HRD3A [Cannabis sativa]	1731685972
EAHYVDGAEKVYKEmVESGVLPDVVTnnAMLNGFC	pentatricopeptide repeat-containing protein At3g09060 [Cannabis sativa]	1731737059
EAKELNACLHqYTnDAVLEEMKREYmVQEDAKATS	uncharacterized protein DDB_G0275933 [Cannabis sativa]	1731746659
EAMAMYQKmHSEGFLPDASSVSSILP	LOW QUALITY PROTEIN: pentatricopeptide repeat-containing protein At1g20230-like [Cannabis sativa]	1731678271
EAVAETQPqPqAEDqIQTQSQFCV	protein SINE1 [Cannabis sativa]	1731724496
EDAAGCRLSSSATRKCQSDSEAmDVKPVTAQKqASTSSQ	nuclear poly(A) polymerase 4 [Cannabis sativa]	1731666808
EDELGSQPRSGPRLLLALDE	B3 domain-containing protein Os01g0723500 isoform X2 [Cannabis sativa]	1731669865
EEmPIGRVmGDmILL	aldehyde oxidase GLOX1 [Cannabis sativa]	1731701438
EFFFRNRWFRGVVESmNEWSmYTVRmHDSTRqMV	protein AGENET DOMAIN (AGD)-CONTAINING P1-like [Cannabis sativa]	1731735154
EFMEYFKGIFAGSVnDVEYnCAqFIPERIS	uncharacterized protein LOC115700330 [Cannabis sativa]	1731744009
EFMLnDVDAGKAGPGPI	adagio protein 1 [Cannabis sativa]	1731729075
EFTnLSQSSPINTmAGGPFTL	fasciclin-like arabinogalactan protein 7 [Cannabis sativa]	1731744155
EGMVPDLSRVIGAVLNSIGVGNQNQAmANVAGTAQSNSMSnnPGTAQGnGSE	ubiquitin-like domain-containing protein CIP73 isoform X3 [Cannabis sativa]	1731667270
EGnqGLCGEPLSKKCEDSLLP	receptor-like protein 6 [Cannabis sativa]	1731685748
EGPnICNPDSSSCLKmIKPCWKPSVEGDGPRRRGGGGDGSG	probable protein phosphatase 2C 38 isoform X1 [Cannabis sativa]	1731685545
EHDGmEFSMFIKnYKKVFEDDLLKFGSEIQILEDKYHQLnEEKEKIEET	structural maintenance of chromosomes flexible hinge domain-containing protein GMI1 isoform X5 [Cannabis sativa]	1731704186
EIDmADRSGISPKESCELmARRAGGRENLGMIPVDY	protein FAR1-RELATED SEQUENCE 5-like [Cannabis sativa]	1731733278
EIDPDTKKNFCnGKIIGAqH	subtilisin-like protease SBT2.5 isoform X2 [Cannabis sativa]	1731731195
EIGFSSVnGnASnPNSESINEIKPESGN	tRNA pseudouridine synthase A [Cannabis sativa]	1731666300
EIGGnLVIQSGGGGGINVGSGSTSSSTA	protein LATERAL ROOT PRIMORDIUM 1 [Cannabis sativa]	1731704731
EIHQLmGDTWCRKRSS	exocyst complex component EXO70B1 [Cannabis sativa]	1731681409
EILSqVNnLEPqIHGHH	uncharacterized protein LOC115695493 [Cannabis sativa]	1731733528
EIVQTECVEKLGELNVGTCSn	RING-H2 finger protein ATL3-like isoform X2 [Cannabis sativa]	1731717989
EKLAmnGKAMGDDTCGMANGIEKLSSIECRE	PH-interacting protein isoform X2 [Cannabis sativa]	1731721027
EKnMSIRSAEVAnKqH	filament-like plant protein 4 isoform X2 [Cannabis sativa]	1731670355
EKTKSnGLSEDLVPEQGEnDEPnDGNNASVmVGAVTAALG	uncharacterized protein LOC115705482 isoform X2 [Cannabis sativa]	1731676428
ELAFGLEMSEQRFMWVVRRPNDKVAnATYFnGTAQNES	hydroquinone glucosyltransferase [Cannabis sativa]	1731676555
ELDRInPRTGSPInSDGDERIDSDEGEVFGNDVY	uncharacterized protein C57A7.06 [Cannabis sativa]	1731664107
ELGKLTnLFDLNVANNNLEGPIPENLSSCTN	LRR receptor-like serine/threonine-protein kinase ERECTA [Cannabis sativa]	1731665076
ELGLGLGYSnQCIQGILnnDSGAGANAGSGLNVTFVANNPLS	uncharacterized protein LOC115723040 isoform X1 [Cannabis sativa]	1731723921
ELGSDGKSISSCKEGAFGTTTDNqqRKKTLDAQ	helicase protein MOM1 isoform X2 [Cannabis sativa]	1731719786
ELLPNGnMVLYDSNG	epidermis-specific secreted glycoprotein EP1 [Cannabis sativa]	1731698194
ELSPHLFAVADTCYRAmRnEHGSqSILVSGESGAGKTET	myosin-12 [Cannabis sativa]	1731728413
EmEEAAVVSWATSNIVASA	uncharacterized protein LOC115704212 [Cannabis sativa]	1731664588
EmVKETIKECEDqSSIKGEDKYCATSLESMIDFTTS	BURP domain protein RD22 [Cannabis sativa]	1731736846
ENESLEGnDqTIEEDGLI	putative calcium-transporting ATPase 13, plasma membrane-type [Cannabis sativa]	1731726023
ENFAYAAQLVNSSVLSmSLQSA	caffeic acid 3-O-methyltransferase-like isoform X1 [Cannabis sativa]	1731678914
EnGDSnGLDWKAIERTFmDEVNENGLLLADQSLR	uncharacterized protein LOC115699237 [Cannabis sativa]	1731741584
ENGRNRKYHQQLISRSLMCMSVGA	mitochondrial Rho GTPase 2 isoform X2 [Cannabis sativa]	1731664421
EnMELQLGCSVTGVIDGKFDNGYLV	high mobility group B protein 10 [Cannabis sativa]	1731732383
ENNGDYSnGHIGnDSDLDKKGSSLKQL	protein GRAVITROPIC IN THE LIGHT 1 [Cannabis sativa]	1731683316
ENPGCLFIATnRDSVGHMTnLqEWPGAGCMVAAIC	phosphoglycolate phosphatase 2-like [Cannabis sativa]	1731680924
ENQKVDSDAPPLNVQPTIASDNQEKLLDKSnGLECKEnNNVDS	uncharacterized protein LOC115722370 [Cannabis sativa]	1731722213
ENRSASCSPFAWIREAMSSSEENVIAmSG	CSC1-like protein ERD4 [Cannabis sativa]	1731739354
ENVVAITSGANMNF	threonine dehydratase biosynthetic, chloroplastic isoform X2 [Cannabis sativa]	1731684925
EPDGSLPLVTVPGPEFnKDNGVm	uncharacterized protein LOC115716760 [Cannabis sativa]	1731706464
EPESQLSSLVYDMSQqVqGVmENMLKMINEIDENS	uncharacterized protein LOC115712703 [Cannabis sativa]	1731666830
EPGqEFTFTIQRGVGTADCVSVnYDDFVnDIAVGDMLLVDGGMmSFL	plastidial pyruvate kinase 2 [Cannabis sativa]	1731705041
EPGSRIGIYGSnC	long chain acyl-CoA synthetase 1 [Cannabis sativa]	1731663528
EPKEIKPGKGEFHEnPEACICDASDKNPNEISPQNQSH	protein ROOT HAIR SPECIFIC 17 [Cannabis sativa]	1731664209
EQGDKLKLVEQNTEGQCNSKCKTIERTCqEVMGYSDTD	uncharacterized protein LOC115706834 [Cannabis sativa]	1731679864
EQQKDDQSTSLDDAVSKDANFATYTNRnFANYGAARRGGADSFKNY	polygalacturonase 1 beta-like protein 3 [Cannabis sativa]	1731689875
EqSCYEVEmISETEKYDMVVANILMn	uncharacterized protein LOC115704727 isoform X2 [Cannabis sativa]	1731674686
EqVVNFRQGLYQEAVYVCSKRnVEnSSDSS	uncharacterized protein LOC115714193 isoform X2 [Cannabis sativa]	1731695460
EREmNAMVSALTRVISGDLPnFTHHHHHSDqRLEMS	ethylene-responsive transcription factor ABR1 [Cannabis sativa]	1731691367
ERESKAMnHHTQLLRGTSDSGLSELn	probable xyloglucan glycosyltransferase 5 [Cannabis sativa]	1731694771
ERLPLEEEEVPLqMqqQVPQSSSGGGG	AT-hook motif nuclear-localized protein 23 [Cannabis sativa]	1731670913
ERRALHGGFGVGPGqKnTmVGDMPS	uncharacterized protein LOC115709426 isoform X4 [Cannabis sativa]	1731685682
ERRLTGKHETASINqFSWGVANRGCS	glutamine synthetase leaf isozyme, chloroplastic [Cannabis sativa]	1731721757
ERVVTKTKYEEEEEEEENISYDELERRMWKDRmRME	putative ETHYLENE INSENSITIVE 3-like 4 protein [Cannabis sativa]	1731694076
ESGVLFTMTMnAHISVRDITTGnSVCSqPLQ	uncharacterized protein LOC115706224 [Cannabis sativa]	1731678300
ESHNPKVLNRSEEVSRGTNFq	uncharacterized protein LOC115716058 isoform X4 [Cannabis sativa]	1731704690
ESLPISNVVDDnLSVPL	probable phytol kinase 1, chloroplastic [Cannabis sativa]	1731673559
ESLPRNETVGGYIFVCNnD	B2 protein [Cannabis sativa]	1731707347
ESMEEGQLSNPLLNVKDRGGGGHSGDEGSKIF	sugar transporter ERD6-like 5 [Cannabis sativa]	1731711862
ESRRAEELVVQEAQPA	uncharacterized protein LOC115714399 [Cannabis sativa]	1731696038
ESVEACAnWFSSSIKENENSSVSNFKLDKMNGVPTNGHFQREKE	folylpolyglutamate synthase [Cannabis sativa]	1731686267
ESYSRTRYMSRTRSMSRTRSVSnYDqRQPDLRnYL	uncharacterized protein LOC115704002 [Cannabis sativa]	1731673468
ETCDIIGQAPGPITSEAEmEKLRnS	sister chromatid cohesion 1 protein 2 [Cannabis sativa]	1731743032
ETLEHALFRCPASQKVWNLTDFnnFInAHCSFNCmDLLYLAA	uncharacterized protein LOC115723805 [Cannabis sativa]	1731725530
ETMVSKLNQMLTDADVAFNVLTASCAEQGNVPAmmLSAGFK	RNA-dependent RNA polymerase 6 [Cannabis sativa]	1731705916
ETNFYLCEINRDmVIDATYKGNKSRYInHSCCPnTEMQKWIID	histone-lysine N-methyltransferase ASHH3 isoform X2 [Cannabis sativa]	1731723656
EVGVGPmTWNKTLVAYARNYAnSMVSKNCELEHSGGIYGEN	pathogenesis-related protein 1B-like [Cannabis sativa]	1731670847
EVIPTLLQIEnLnKDDARMDN	uncharacterized protein LOC115719393 [Cannabis sativa]	1731667944
EVLAATqTqGEAGMKWFqGTADAV	glucose-1-phosphate adenylyltransferase large subunit 1 [Cannabis sativa]	1731692711
EVLAQLQEVTTWSnLnnWLmPGGRIMVNCGGT	uncharacterized protein LOC115708272 isoform X1 [Cannabis sativa]	1731683481
EVLLSATGKDATDDFEDVGHSDSARDmmN	cytochrome b5 [Cannabis sativa]	1731722437
EVNKSTSTWQKqPLIPLVRSSSSSSSSSSSY	uncharacterized protein LOC115708652 [Cannabis sativa]	1731683889
EVNWDPLDEMIEDAHYGSAVDQSKFDnLLS	uncharacterized protein LOC115694889 [Cannabis sativa]	1731732515
EVQMDQKLPDLLEFEnEFSmnVSV	uncharacterized protein LOC115717594 [Cannabis sativa]	1731708379
EVRCPCGGCKnRRTYNLKTIESHL	uncharacterized protein LOC115699184 isoform X2 [Cannabis sativa]	1731741441
EWGGEVVNSRPNGEHTSTqMGSGHFAEDGFGKASYF	uncharacterized protein LOC115720846 [Cannabis sativa]	1731718226
EWGPIEYSIMAKHFNRqGNSAYEYHSqYmAHILS	uncharacterized protein LOC115724617 [Cannabis sativa]	1731727764
EYLPFGSGRRGCPGMTMGLTmVEFTLAnL	cytochrome P450 71B26 [Cannabis sativa]	1731691514
FAGDSSHPECEEIYKFLnVIKERLqLMGYSPDYSQAPLVnEEGD	pentatricopeptide repeat-containing protein At1g59720, chloroplastic/mitochondrial [Cannabis sativa]	1731674792
FAPDMEESVVHLQNRWNRVQqEqDGEDLTRAAGFCTRDSLPLTSE	LOW QUALITY PROTEIN: autophagy-related protein 2 [Cannabis sativa]	1731671753
FCFICGVLGHSERFCEqLFHTPIE	uncharacterized protein LOC115699939 [Cannabis sativa]	1731743356
FCYHSRLSIAGnCRmCLVEVEK	NADH dehydrogenase [ubiquinone] iron-sulfur protein 1, mitochondrial [Cannabis sativa]	1731677717
FDAPSSVINTCNSFYCDqFTPIYPDKPKIWTEnWPGWFKTFGSP	beta-galactosidase 10 [Cannabis sativa]	1731695884
FDMHEKPLISWnSLISGCVqSGKATDAFEVFCqMKMH	LOW QUALITY PROTEIN: pentatricopeptide repeat-containing protein At2g04860-like [Cannabis sativa]	1731719496
FDSVSEVAQAAKRSLqAAF	E3 ubiquitin-protein ligase listerin [Cannabis sativa]	1731714717
FDVSSGISFLCDLNDNIPAPWPnSSq	uncharacterized GPI-anchored protein At1g61900 [Cannabis sativa]	1731682210
FEGCLTNFEIGDEGVEATQLYPEIKYVSVD	bifunctional pinoresinol-lariciresinol reductase 2-like [Cannabis sativa]	1731704533
FELGKKFGVTDFVNGANCGDKSLSQVImKMTDGGADYC	alcohol dehydrogenase-like 7 [Cannabis sativa]	1731667259
FEYPQQQQQqqQDSDEKSIKIVAI	ultraviolet-B receptor UVR8 [Cannabis sativa]	1731738351
FFGDGFVTPARERNMEGDQVSTLVGEKTVEnTTSNFPTQ	uncharacterized protein LOC115715852 [Cannabis sativa]	1731704162
FFHTADTYFqIILKLGLAGHIqEMEGFCqNmV	pentatricopeptide repeat-containing protein At1g12620 [Cannabis sativa]	1731719902
FFMDQMLAYLLMSASSSASTRVDDWQSnWGKDKFPDmAHAAVGASFAA	CASP-like protein 4A1 isoform X1 [Cannabis sativa]	1731744587
FFMVEnVRKAITIDEHVPDSLTTSMVDDVFYVLQSC	LOW QUALITY PROTEIN: conserved oligomeric Golgi complex subunit 4-like [Cannabis sativa]	1731676370
FGNDMVPEVRHmCESDWLYLADLLKCPTSENSQLKDTSSTDST	uncharacterized protein LOC115706099 isoform X2 [Cannabis sativa]	1731677967
FGSASFKSYPHGNAIAIEEEHDGFRDqESIqAELTRmNCTVFKP	uncharacterized protein LOC115701440 isoform X2 [Cannabis sativa]	1731670300
FGSSFDQCLSNLELVLARCEDSNLVSnREKCHFmVTEGI	uncharacterized protein LOC115696740 [Cannabis sativa]	1731735744
FHGMKEDDLGMNSqLMWLRGDYGDRGIqALnYQ	auxin response factor 6 [Cannabis sativa]	1731738349
FHRRPSVnQEFAQKNMLSEDAL	uncharacterized protein LOC115721195 isoform X2 [Cannabis sativa]	1731719536
FINNYIRTDRSnGFRALVVTED	ER membrane protein complex subunit 1 [Cannabis sativa]	1731669690
FLCKYSMIEGDPLGDKLESIDYEVKFEANTSDGGCVC	pathogenesis-related protein STH-2 [Cannabis sativa]	1731721345
FLDNSTSTSGGGARLVAEIPYSSTSNnDNNHI	homeobox-leucine zipper protein ANTHOCYANINLESS 2 isoform X2 [Cannabis sativa]	1731679237
FLPSTISTmSTDGGESSGGAVFHGFGSGGGVGSGGTDQRMVHTY	subtilisin-like protease SBT1.7 [Cannabis sativa]	1731704472
FLSSMGSTIQGISIGLGPDGELCY	inactive beta-amylase 9 [Cannabis sativa]	1731722162
FmAVLSACSHAGLVEEGLRYFHTmTSDYnVTPDqEIYGCVVDLLGR	putative pentatricopeptide repeat-containing protein At1g56570 isoform X2 [Cannabis sativa]	1731719975
FnnHFCDTImFGVTSVSFQVLINGDITK	uncharacterized protein LOC115721154 [Cannabis sativa]	1731668203
FNPARGIRQGDPmSPYLFL	uncharacterized protein LOC115695525 [Cannabis sativa]	1731733576
FNSPmGLRAELVDVNCWEHWKnWFKEDFnRPPNLTFQE	uncharacterized protein LOC115717538 [Cannabis sativa]	1731708281
FPEFKPVVGLLASGDQNWVGMqSCNqmHGIEDSNIMKVSRYSEE	probable cyclin-dependent serine/threonine-protein kinase DDB_G0292550 [Cannabis sativa]	1731689449
FPVAKPIPEPqVTDYPDCESSNGKHG	uncharacterized protein LOC115714420 [Cannabis sativa]	1731696101
FQAKEAqWRYqLEmmTGDLNKYRSQLN	uncharacterized protein At4g38062 [Cannabis sativa]	1731696316
FQHPAPSTVPTGAPISGHSVPQmLPSRPDmSAL	LOW QUALITY PROTEIN: ENHANCER OF AG-4 protein 2 [Cannabis sativa]	1731682798
FQmHPDKSPGPDDVINCVKnFFLTKEMPEGMnATnIVLIP	uncharacterized protein LOC115716546 [Cannabis sativa]	1731705898
FqTYTSmDFAGFSVGIPHKEEVVKCCDEVHPLA	bifunctional 3-dehydroquinate dehydratase/shikimate dehydrogenase, chloroplastic isoform X2 [Cannabis sativa]	1731663834
FQVTLFPNFGFSIGMVNHHAAIDGKSVHmFLKTWTHICQSQQQEYnYSYSPLE	malonyl-CoA:anthocyanidin 5-O-glucoside-6''-O-malonyltransferase [Cannabis sativa]	1731745542
FRNCmPSRSKVDSFMSGKSTDEKnRDQQVAPVGSSTSTSNIES	probable serine/threonine-protein kinase PIX7 isoform X2 [Cannabis sativa]	1731739644
FRSLCTSPmCPPDTAmTEYqHSVLSSDRKKLVFETVqQAHDVPF	BAG-associated GRAM protein 1 [Cannabis sativa]	1731682906
FSCISRNSnYAAHnMAKWAFTnNVTGmVEISTIPG	uncharacterized protein LOC115695339 [Cannabis sativa]	1731668877
FSEGGAHSHGGNDNNNnNNNDDEIEKTLAILIGL	plasmodesmata-located protein 6 [Cannabis sativa]	1731695456
FSmnVPSGELFRPASFSFqSPQPAQASPP	nuclear pore complex protein NUP214 isoform X2 [Cannabis sativa]	1731728983
FSNHIPTTqIGVSGSSEPSHHS	serine/threonine-protein kinase 38-like [Cannabis sativa]	1731737164
FSVRTGGDTISSnQTLnGFSTIVSAG	G-type lectin S-receptor-like serine/threonine-protein kinase At4g03230 [Cannabis sativa]	1731740529
FSYDGQPPLFVnFDLDIKPGSRCLLVGAnGS	ABC transporter I family member 19 [Cannabis sativa]	1731692906
FTDYAKLVAAEMVQQLENNQEEETTA	uncharacterized protein LOC115717620 [Cannabis sativa]	1731708423
FVLLNMDqKVDSNINVGEEWLGSCSEL	choline monooxygenase, chloroplastic isoform X4 [Cannabis sativa]	1731712942
FVPGLQGHPMQHQGMMHQAQNMSFTSQmAPmQQQLSNMGIIAPQY	eukaryotic translation initiation factor 4G [Cannabis sativa]	1731666114
FYPVSTPDTPDISnVKSPFInRYYGKAHE	protein HEAT INTOLERANT 4 [Cannabis sativa]	1731692400
FYSGISAVIVGSTASSAVY	protein MITOFERRINLIKE 1, chloroplastic [Cannabis sativa]	1731665960
GAAAPGAGGGPQYTDFPAIPSH	mitogen-activated protein kinase 3 [Cannabis sativa]	1731714782
GAESTSTEDAnLAnnARQKAKELSLDMKSITQ	nuclear pore complex protein NUP155 [Cannabis sativa]	1731692528
GAFYVGTSSLEEGLSVqqCCTFRGS	uncharacterized protein LOC115700679 [Cannabis sativa]	1731744737
GAGGEKTTENNqQDSPSHAHFFGDGFVTPARERNMEGD	uncharacterized protein LOC115715852 [Cannabis sativa]	1731704162
GAGGMPGAGGMPGAGGmPGAGGMPGAGGVPGNVDFSKILNDPE	FAM10 family protein At4g22670 isoform X2 [Cannabis sativa]	1731705291
GAGTVLAnDTTNQTFCVAKEGSDRKmLQAALDWAC	glucan endo-1,3-beta-glucosidase 3 [Cannabis sativa]	1731695438
GALLHSESNIFSPRHKASHIDDDNFSGHRQSSSSAmSP	protein JINGUBANG [Cannabis sativa]	1731672367
GANMENQLTTASDAnMDKQSTVGNHTGYLSEY	retinoblastoma-related protein [Cannabis sativa]	1731676565
GANPGRSPSGDVSCSEILQ	asparagine--tRNA ligase, cytoplasmic 2 [Cannabis sativa]	1731698693
GANQSADFFRADnPEGIEARNEVAALAFD	6-phosphofructo-2-kinase/fructose-2,6-bisphosphatase [Cannabis sativa]	1731711523
GAPIqVETEEHALDHSNNQFTK	LOB domain-containing protein 42 [Cannabis sativa]	1731696593
GATTTNGVASGAnHSSELATSEPSSnVQPnQQNQQQQQQQQR	uncharacterized protein LOC115709345 [Cannabis sativa]	1731685487
GAYPNAQNQWAAGYAAQPqAWPPASqAQGQQWNPGYTQ	pre-mRNA-processing factor 39 isoform X3 [Cannabis sativa]	1731697551
GDANLGnIVAQQEmHnMnGKAPSVTLDYQA	transcriptional activator DEMETER isoform X2 [Cannabis sativa]	1731678005
GDDHQSLPSSPTSSAVTAISGRSSLGmSLqYKGAWCTPPR	protein S-acyltransferase 21 [Cannabis sativa]	1731677299
GDIGKTNHAAKnEFHESKLLAQSH	uncharacterized protein LOC115704185 [Cannabis sativa]	1731673757
GDKKWEILSSFWVEMLSYAASHCRPDSHA	uncharacterized protein LOC115722069 [Cannabis sativa]	1731721457
GDLSGQLFWqHSRCSPECSPIPSPRmISPGPSSRIHSG	mitogen-activated protein kinase kinase kinase YODA [Cannabis sativa]	1731707847
GDNGYGnAmNVKRTVKSY	uncharacterized protein LOC115722836 [Cannabis sativa]	1731723387
GDNTLEGDASGAEKFGPGSmYARVAFIV	protein FAM91A1 [Cannabis sativa]	1731667332
GDRLIVIGGPRSGESFI	F-box/kelch-repeat protein SKIP11 [Cannabis sativa]	1731741300
GDTKSLNGNHGLEDDVVDMTmSKEnPVDQILEFEAnD	membrane protein of ER body-like protein isoform X2 [Cannabis sativa]	1731696990
GDVIVSPNTTSFDNNSINHLSGTSSSSNPLmM	dof zinc finger protein DOF5.7 [Cannabis sativa]	1731691234
GEAPVPQnAGnASKEEANSTASKF	uncharacterized protein LOC115709784 isoform X1 [Cannabis sativa]	1731665978
GEDGSSGKKKGLLDIASKSWADNVSNNSDSm	LOW QUALITY PROTEIN: probable serine/threonine protein kinase IREH1 [Cannabis sativa]	1731690313
GEESEVINRWLTDqSDKmTqSAQAPVESGSTSYmTSDVEDHVI	NAC domain-containing protein 14 [Cannabis sativa]	1731703909
GEIYERIESSKQqKmmELEKQRmEFAMDLESQ	trihelix transcription factor ASIL2 [Cannabis sativa]	1731673827
GEKGHTESLLnGNSEF	uncharacterized protein LOC115716661 isoform X2 [Cannabis sativa]	1731706185
GEKLqSQISSVMDENNMLnETY	paramyosin [Cannabis sativa]	1731741284
GEqVHCFAIKSGLDGnVTVGTSLISmYSKGGC	pentatricopeptide repeat-containing protein At2g33680 [Cannabis sativa]	1731684322
GEREDSRSImTDYSSSVSSGmDSEKSSKRKRWSYDDSLDnIDIR	protein SHORTAGE IN CHIASMATA 1 isoform X2 [Cannabis sativa]	1731706229
GEVKSVPPSnERASRCTNSSNA	ubiquitin carboxyl-terminal hydrolase 16 isoform X2 [Cannabis sativa]	1731667687
GFKLLSFMDAYSGYNQIKmHVADqECISFKTDK	uncharacterized protein LOC115723658 [Cannabis sativa]	1731725290
GFMIKNFCDLLNCPVAPDDMTINNSSqGAATSESnnLPIGKGSSSSTSAL	zinc finger protein CONSTANS-LIKE 14 isoform X2 [Cannabis sativa]	1731737350
GGAALIWGDGHCRnqKGSVAAEKnSSE	transcription factor bHLH3 [Cannabis sativa]	1731714068
GGGGGGGGKGGGGGGGGGGGGKGGEGGK	36.4 kDa proline-rich protein [Cannabis sativa]	1731705299
GGGGGGGRFSFGRGG	DEAD-box ATP-dependent RNA helicase 7 [Cannabis sativa]	1731707851
GGGGGGSGSPSAVGGGGVmSPTLSLQGSFNNNIFNSTTQmQPHqTTVLNHN	LOB domain-containing protein 12-like [Cannabis sativa]	1731738763
GGGGGSWTmIPTNIQSHSNVSTPSNQENLYGHHHQQQFQPHQSP	mediator of RNA polymerase II transcription subunit 9 [Cannabis sativa]	1731680162
GGGKMGQMGEMGRGGGGGVMGRMGPSGPVGQNGGGRSQMGMGPM	heavy metal-associated isoprenylated plant protein 34 [Cannabis sativa]	1731711820
GGGVVDYNLNFSISSSGGLAGFNRG	transcription factor TCP2 [Cannabis sativa]	1731736476
GGLGRSGVNLPEPSSNSSASqVRPSMqGVqGMGMLGSINSSSQmR	transcription initiation factor TFIID subunit 12 isoform X2 [Cannabis sativa]	1731687882
GGLPSRPASRNAFEENVDNVNSAEADLAHLHH	pumilio homolog 2 [Cannabis sativa]	1731713212
GGNInLImnEDVNSSSGSNLKVEQNNNVYLTSNGSYNN	uncharacterized protein LOC115714880 [Cannabis sativa]	1731697212
GGqqGYSTGQLLGGSTVDNLEVPVTH	uncharacterized protein LOC115709348 [Cannabis sativa]	1731685493
GGSEqEGVVKDmGDGTYTVTYVVPKRGNYmVTIECNG	LOW QUALITY PROTEIN: serine/arginine repetitive matrix protein 2 [Cannabis sativa]	1731722183
GGSVATKEVLIHDNTISPSSNEPGNnETCDTKFRTqQE	uncharacterized protein LOC115709741 isoform X2 [Cannabis sativa]	1731665966
GHFqEqSHPSLPVEQRQKRENDVYEQQ	uncharacterized protein LOC115698952 isoform X5 [Cannabis sativa]	1731740721
GHHQHQQQQQQqLPDqVVGSPH	transcription factor bHLH110 isoform X2 [Cannabis sativa]	1731670227
GHnSGHnSVGGDLSGqLFWQHSRCSPECS	mitogen-activated protein kinase kinase kinase YODA [Cannabis sativa]	1731707847
GIDIYFDNVGGEmLEAAIANmKHFGRVAACGVISEYTnTNNRTSLN	2-alkenal reductase (NADP(+)-dependent) [Cannabis sativa]	1731665602
GIFAGSDLGVDFNCAHLFqqKISqED	uncharacterized protein LOC115718388 [Cannabis sativa]	1731667805
GIFDHAPALLTFHqnmqT	uncharacterized protein LOC115717893 [Cannabis sativa]	1731708900
GIGGLLRDHNGqP	uncharacterized protein LOC115697684 [Cannabis sativa]	1731669277
GIKDSEPECLCFImQQTHSGNDKIKSmGIQETKLIq	non-specific lipid transfer protein GPI-anchored 1 [Cannabis sativa]	1731697748
GInnREGSSPLH	U-box domain-containing protein 4 [Cannabis sativa]	1731691015
GIVKGqERVnAnLAFm	polyphenol oxidase, chloroplastic-like [Cannabis sativa]	1731725022
GKDLEYIFIMqWREPLSSVFTDQLWYYCNLQNESCDVTNSPHQA	tetraspanin-8-like [Cannabis sativa]	1731693420
GKGEGPAIGIDLGTTYSCVGVWQH	probable mediator of RNA polymerase II transcription subunit 37e [Cannabis sativa]	1731705155
GKKLDGGGVASGGLRELIPC	2-dehydro-3-deoxyphosphooctonate aldolase [Cannabis sativa]	1731722038
GKMLEAALAnmnNFGRVVSCGTISEYTDPNNKVPPNINmH	2-alkenal reductase (NADP(+)-dependent) isoform X1 [Cannabis sativa]	1731733819
GKPVSENESILADKEPGnTNAMEKDA	RRP12-like protein [Cannabis sativa]	1731686228
GLAKSRSmQDSTqTEDELqqIIPGS	uncharacterized protein LOC115699422 [Cannabis sativa]	1731742130
GLDPQVESIIqDCWK	probable serine/threonine-protein kinase drkD [Cannabis sativa]	1731706201
GLEGLQQqQQQAGP	protein PHYTOCHROME-DEPENDENT LATE-FLOWERING [Cannabis sativa]	1731680622
GLFqCmKFPCPHACAVSqERSISAYTLCSLYYTTEYWRRTYE	uncharacterized protein LOC115713236 [Cannabis sativa]	1731693652
GLGIVDALNNEKPGH	FCS-Like Zinc finger 8 isoform X2 [Cannabis sativa]	1731722983
GLGLPNMEqMLSGGMPDTTQMNQLLQNPAISQMMQSLLSNPQYmNQmLNLNPQLR	ubiquitin domain-containing protein DSK2b isoform X2 [Cannabis sativa]	1731664237
GLISSKPELELEVEDVGNEmInDLCWRSFFLDmEKDPFDRTYF	putative disease resistance protein RGA3 [Cannabis sativa]	1731718195
GLNWGASGNISSNTNANNNNRTQNLGGGGFGVGIGGGGGGGGGMn	uncharacterized protein DDB_G0283357 [Cannabis sativa]	1731722575
GLPGQGISMPMQRAPLVPmMGGTFM	transcription factor PIF3 [Cannabis sativa]	1731714549
GLTLATPISnKPLVVCCSTSDMGS	uncharacterized protein LOC115714977 [Cannabis sativa]	1731697430
GMETFLmDAESLASELQKKFA	LOW QUALITY PROTEIN: eukaryotic translation initiation factor 2D-like [Cannabis sativa]	1731705453
GmGGVIGGGGnGLNGGIGGGIGLGGGNGGLFGGLGG	glycine-rich protein 5 [Cannabis sativa]	1731696741
GMLSGVSEqTGVGSPDALRNMLqQFTQSPQ	ubiquitin-like domain-containing protein CIP73 isoform X3 [Cannabis sativa]	1731667270
GMPQIGGGGKAREALWQRMAGCmEQL	conserved oligomeric Golgi complex subunit 5 [Cannabis sativa]	1731741905
GMRImKDNRNPVTVNGnIKPPTESHqEHQ	uncharacterized protein LOC115709390 [Cannabis sativa]	1731685582
GmRnFSFDKPRRGSHNEDGDmRNFSSNKPRRGSSNEDGGMRNFSSD	uncharacterized protein LOC115720600 [Cannabis sativa]	1731717383
GMVNNNDHDNLGFFGEVVGGIEGELFVPPLESDETTDHHPqRVINMSn	transcription factor MYB46 [Cannabis sativa]	1731710246
GNAGKRPAWnmPSnGIVEVGTVmGADSWPELES	la-related protein 1C [Cannabis sativa]	1731691640
GNCPKVASNVFYDmLSKGVSPTVYTFG	pentatricopeptide repeat-containing protein At5g64320, mitochondrial [Cannabis sativa]	1731724305
GnGSGLCLLYQLPnSNYNGAGA	uncharacterized protein LOC115716477 [Cannabis sativa]	1731705757
GNILnGVRLTVSSEqn	uncharacterized protein LOC115719965 [Cannabis sativa]	1731715778
GNITTGSIQDFSYQNSIVMGNnGnMQIVRQDIH	peptide-N4-(N-acetyl-beta-glucosaminyl)asparagine amidase A [Cannabis sativa]	1731737086
GNKGGLAERFLDPqPnYSAFREASYGHSTLEImnRTHA	bifunctional purple acid phosphatase 26 isoform X5 [Cannabis sativa]	1731730341
GnLGPKDVCSPAHqqLALEAAH	putative beta-D-xylosidase [Cannabis sativa]	1731726470
GNLVLRDEKDDNTTN	S-locus-specific glycoprotein S13-like [Cannabis sativa]	1731715908
GNLYSAPLRIQQCQEQQNNETLGNSnS	uncharacterized protein LOC115700679 [Cannabis sativa]	1731744737
GNqDDFNnSSPLLEIPHTDK	golgin candidate 1 isoform X2 [Cannabis sativa]	1731676389
GnSnGIEEPEQIGLVKWVKDmVNGTGELEKImESSMEGECDMKKFG	putative receptor protein kinase ZmPK1 [Cannabis sativa]	1731732473
GNWTDTHCSWSPNGDWIVFSSSRNKSPDAPKTDNG	uncharacterized protein LOC115723962 [Cannabis sativa]	1731725802
GNYDIVQQPKNVSYLARKnVPFYmFIDEETETY	uncharacterized protein LOC115706374 isoform X2 [Cannabis sativa]	1731678683
GPADGGPPKTNDLLELLGGNLNCSICMQ	E3 ubiquitin-protein ligase ORTHRUS 2 [Cannabis sativa]	1731691932
GPEITITLDGEGPVGqVNCMTVVn	zinc finger CCCH domain-containing protein 48-like [Cannabis sativa]	1731746838
GPEQLEELGALSSH	uncharacterized protein LOC115703217 [Cannabis sativa]	1731672407
GPESNGLNRAQFPMGFVF	LOW QUALITY PROTEIN: beta-glucosidase 44-like [Cannabis sativa]	1731686858
GPLLYHFADMYGqEDEMSIELSLEDVKKVALHYGFNF	carnosine N-methyltransferase isoform X2 [Cannabis sativa]	1731741959
GPLVnVDGEVVGMnIm	putative protease Do-like 14 isoform X2 [Cannabis sativa]	1731717864
GPSKKVAGMHEVDAITKLTAQRnQSQSQMQPQTQnYSGNS	uncharacterized protein LOC115723634 [Cannabis sativa]	1731725248
GPTLYPPMASPSGSSSqQYGVVVARSSm	zinc finger CCCH domain-containing protein 34 [Cannabis sativa]	1731721736
GqEIAVKSLSMCSGQGASEFKNE	LOW QUALITY PROTEIN: uncharacterized protein LOC115719149 [Cannabis sativa]	1731712595
GqIPPSIGNmANLQVLQLCYnQLT	protein NSP-INTERACTING KINASE 2-like [Cannabis sativa]	1731682808
GqKLRNImLDANIDLYGPYGRPLLNCAGGGTCATCm	photosynthetic NDH subunit of subcomplex B 3, chloroplastic [Cannabis sativa]	1731681583
GQKYqTEKVIECLQRMCQL	pentatricopeptide repeat-containing protein At4g20770 [Cannabis sativa]	1731739792
GqLPALLTLSIERCDAVEmVGVEFYGTSSSQSFPLL	putative disease resistance protein At3g14460, partial [Cannabis sativa]	1731674515
GqNNNAAnnPFAPKP	nuclear pore complex protein NUP98A isoform X4 [Cannabis sativa]	1731697950
GqPIVVDSVKGSHMRDIDGNDYI	LOW QUALITY PROTEIN: glutamate-1-semialdehyde 2,1-aminomutase 2, chloroplastic-like [Cannabis sativa]	1731686687
GQPmAPYGVQYPPSMQAGPPGAPP	splicing factor-like protein 1 [Cannabis sativa]	1731666746
GqRSGSLSAASQQIHWRTS	endoglucanase 3 [Cannabis sativa]	1731707343
GqSYSVLVTGnKAPqDY	L-ascorbate oxidase homolog [Cannabis sativa]	1731664192
GqTFFNTTNVVTGAHNFSGYSG	uncharacterized protein LOC115711503 [Cannabis sativa]	1731689943
GQTREHALLAFTLGVRQmICCCNKmDATTPKYS	elongation factor 1-alpha [Cannabis sativa]	1731722297
GQVKQIGIAEHGGFDm	riboflavin synthase [Cannabis sativa]	1731687909
GQWLGLTNATTDGnPSNQIVA	probable L-type lectin-domain containing receptor kinase S.5 [Cannabis sativa]	1731671517
GRACVVAFATSQTLQQMGAAYTSKNqVqNqSQLPQGQG	cleavage and polyadenylation specificity factor subunit CG7185 [Cannabis sativa]	1731695604
GRAHLNFGEPDGAMqSFDKALAIKPDCEE	tetratricopeptide repeat protein 33 isoform X2 [Cannabis sativa]	1731746640
GRAPLCFEmDVEQTVDVDGTqESVFETqAKTINEAVT	uncharacterized protein LOC115713094 [Cannabis sativa]	1731693426
GRCFADAGEISLRHNIAVVISDPLNENHGHS	probable protein phosphatase 2C 4 [Cannabis sativa]	1731735933
GREEAAmVmFGAInELFAKTK	3-ketoacyl-CoA synthase 15 [Cannabis sativa]	1731739758
GRIKHVFGAPqMIDIGETEDSGSDqIYRSqS	uncharacterized protein LOC115706105 [Cannabis sativa]	1731677981
GRKQEKmmSAYSSmSPAKVRSSWQnSPATTPFSPIF	putative multidrug resistance protein [Cannabis sativa]	1731693464
GRNSTYNEINQSInPYQSTnADELIAREERDMY	uncharacterized protein LOC115724015 [Cannabis sativa]	1731725909
GRSIEATFPGTVqFAPLqIqRWPMSSSASGLMADEDS	AP-5 complex subunit mu [Cannabis sativa]	1731723464
GSGALKLLEnGETLLKmmVQCmNMSQ	BTB/POZ domain-containing protein At1g04390 isoform X2 [Cannabis sativa]	1731689557
GSGGGGGGGTGGAGGGmEVEPEKEV	glycine-rich cell wall structural protein-like [Cannabis sativa]	1731709214
GSGSGmGRVGAGALRPLAnPmVGSGMGMGMGGGPGPG	clathrin interactor EPSIN 2 isoform X2 [Cannabis sativa]	1731723303
GSLLAASnIHGDAELGEHALqQLmMLEPQnS	pentatricopeptide repeat-containing protein At5g56310 [Cannabis sativa]	1731725686
GSPqVISmLGNSYPSAGGPLSqSHVQ	probable NOT transcription complex subunit VIP2 isoform X2 [Cannabis sativa]	1731712413
GSRGEGGILRNSEGERFm	succinate dehydrogenase [ubiquinone] flavoprotein subunit 1, mitochondrial [Cannabis sativa]	1731696046
GSSSSVTAmWKSPVTSHRCRIIQmPVEFAD	beta-amylase 1, chloroplastic [Cannabis sativa]	1731723851
GSTSPGGFPIGGRPGAGGmmPGMPGANRKMPGMPVIGMDNDn	eukaryotic translation initiation factor [Cannabis sativa]	1731731220
GSVPTSNPnVLHLSGFLAN	(R)-mandelonitrile lyase 1 [Cannabis sativa]	1731729647
GTEANELAmmIARLYTGCHDIISLRNAYHGNAAGTmG	alanine--glyoxylate aminotransferase 2 homolog 2, mitochondrial [Cannabis sativa]	1731737074
GTGLIIGTEFTDNKSPNDPFPPE	gamma aminobutyrate transaminase 3, chloroplastic [Cannabis sativa]	1731742098
GTNqQNVESFNIMASGFLGINNNNSIKTECFGnQImHQSERYHDQY	BEL1-like homeodomain protein 3 [Cannabis sativa]	1731670248
GTTGNENHSGKqPmFQRGVLRTnCIDCLDR	LOW QUALITY PROTEIN: phosphoinositide phosphatase SAC3 [Cannabis sativa]	1731676436
GTVNSYSGRVSEmAHGGAPYQnLDSHDGHGVGGTHPNAWA	uncharacterized protein LOC115697545 [Cannabis sativa]	1731737666
GVEGTTAALTCAACGCHRNFHRREPDqTPSTTTSHH	mini zinc finger protein 2-like [Cannabis sativa]	1731744302
GVGAAWnTAnVqPGSTVAIF	alcohol dehydrogenase-like 4 [Cannabis sativa]	1731704668
GVGGDNEVQRTmLEIVNqLDGFD	26S proteasome regulatory subunit 7 [Cannabis sativa]	1731680830
GVGLSVVnALSEALDVTIWRDGMEYRqSYSRG	DNA gyrase subunit B, chloroplastic/mitochondrial isoform X2 [Cannabis sativa]	1731742274
GVLGCqWGDEGKGKLVDILAQHFDIVARCQGGA	adenylosuccinate synthetase 2, chloroplastic [Cannabis sativa]	1731722263
GVLGCqWGDEGKGKLVDILAqHFDIVARCQGGA	adenylosuccinate synthetase 2, chloroplastic [Cannabis sativa]	1731722263
GVNVGSGNGGVGVGIGnGGGGGGGGGFWVGn	leucine-rich repeat extensin-like protein 6 [Cannabis sativa]	1731676341
GVQADPSKITAmVQWPqPqSMK	uncharacterized protein LOC115723540 [Cannabis sativa]	1731668500
GVSVARnSSPITHLFYADDSIFFCHAN	uncharacterized protein LOC115721991 [Cannabis sativa]	1731668275
GYEGMFSVDAqGRSGGLAMmWKEqSDAEVSGYSQNHIDLIVNHNEL	uncharacterized protein LOC115710882 [Cannabis sativa]	1731688793
GYFAGANILmEYVLSNAAVARSFTEYLCITF	cationic amino acid transporter 6, chloroplastic [Cannabis sativa]	1731704509
GYFmGCQINDnVQnEEEAIVHRGVSQSYYSSRDLSIVSQSLTEYn	uncharacterized protein LOC115702937 [Cannabis sativa]	1731671798
GYGqKTYVPqAALEDLPMATMGKAREE	3-ketoacyl-CoA synthase 11 [Cannabis sativa]	1731734471
HAKNPLSSPESmqMQYSRPVnRSSPQASVSMnERASGTPVQAQGGPST	ATP-dependent helicase BRM [Cannabis sativa]	1731678991
HAnYSELSTEKSAPVSETVEKnKVDVMNSSTENNHTN	vacuolar protein sorting-associated protein 54, chloroplastic isoform X1 [Cannabis sativa]	1731709762
HCqMLEDLDVTDnEMDDEGLKAISR	F-box/LRR-repeat protein 3 [Cannabis sativa]	1731719462
HCVNKTKAVGDqLADQVFQGSIRCLEKmESTSENDLQNIKSEYACGG	uncharacterized protein LOC115723040 isoform X2 [Cannabis sativa]	1731723924
HDqHHHqESHRKSCPLCRAPFLTqEQSQRLTmGVAPQP	E3 ubiquitin-protein ligase RHA1B-like [Cannabis sativa]	1731673631
HDTLKLQqAqDSSSPAGASAGGTGDHNLQmmMGLGLSSQAMDWNQAALF	transcription factor bHLH123 isoform X3 [Cannabis sativa]	1731733987
HDVFmVQHDMENMYMWVFKERPENALGKMqLRSYM	uncharacterized protein LOC115697262 [Cannabis sativa]	1731736902
HEqDqSVNNSISAGSFPKEqISSSSEDIPVTQNI	protein SPIRRIG [Cannabis sativa]	1731663749
HGGGGGAEDSPTGmTNGGGGGHmGEGQGL	AT-hook motif nuclear-localized protein 19 [Cannabis sativa]	1731720607
HGYAAVNRFGmLRnDHDIFQTFEGDnT	acyl-coenzyme A oxidase 2, peroxisomal [Cannabis sativa]	1731692998
HHHALqqSTNPGSLITPLVQFSTDnHHQYQ	B3 domain-containing protein Os03g0120900-like [Cannabis sativa]	1731673119
HICPNTTTFSPNSTYQTnLNNLLSSLS	cysteine-rich receptor-like protein kinase 10 [Cannabis sativa]	1731681455
HIPPEGIPGSGHHHHYHGGAMWPSGRNEMGNWNGY	protein SRC2 [Cannabis sativa]	1731689616
HISSSSSnEnGTLLALmnHP	protein N-terminal asparagine amidohydrolase [Cannabis sativa]	1731726509
HLGHSFFNPASHHNLLEEIPNSAPNFLMNqSSMADFA	protein YABBY 4 [Cannabis sativa]	1731704062
HLLDDGSDqDPFLATKLInMYSELDSIDTA	pentatricopeptide repeat-containing protein At3g46790, chloroplastic [Cannabis sativa]	1731712317
HLRGQEEmLMEENNNLKnKLEEICG	MADS-box protein CMB1 isoform X2 [Cannabis sativa]	1731745803
HLSSnYFTMAFNSNWTPPFQAKYLFLGSCRL	receptor-like protein EIX2 [Cannabis sativa]	1731684328
HmSKVLPPqMLKQIGGMGG	signal recognition particle 54 kDa protein 2 [Cannabis sativa]	1731682446
HNFVATPGGMLSGRGNILVYLNNMmFYVVKDG	squamosa promoter-binding-like protein 7 [Cannabis sativa]	1731721650
HnGDVKRSDPmDRLESVKGHLVSFPLDFMCqE	phospholipase D zeta 1 isoform X3 [Cannabis sativa]	1731723158
HnQLDIMHnNAGVPCNTPLSIVDLDMAVFD	zerumbone synthase isoform X2 [Cannabis sativa]	1731663838
HNSGRVILIFSVnmSGFFqGYAqMMSSVG	zinc finger CCCH domain-containing protein 45 isoform X3 [Cannabis sativa]	1731706351
HnSHFISSIHTSPQFCYAAPTY	B3 domain-containing transcription factor LEC2 [Cannabis sativa]	1731735284
HPAMQQGGYFTQHPQAAAMmqQSGIFPPKmPmQFNN	GRF1-interacting factor 3 [Cannabis sativa]	1731734055
HPNVVQFVGAVTqNMPMMIVLEY	integrin-linked protein kinase 1 isoform X2 [Cannabis sativa]	1731682975
HPPLLMEAHALYFALSWCHAHSFYPDSIVSDCKVLVDYICnnDTH	uncharacterized protein LOC115724971 [Cannabis sativa]	1731668684
HQMVNRGALSGSAQAAmALTNYQNLLmRSNSMNSNPNSIQQEASSSF	probable transcriptional regulator SLK2 isoform X2 [Cannabis sativa]	1731706168
HqPmVRPVTGPPGqPPQG	trithorax group protein osa [Cannabis sativa]	1731718477
HqSYHVqPTPQVAPA	transcription factor UNE12 [Cannabis sativa]	1731713735
HRSICIDDRSIGYISALPGSGESMFKAEmSAGAAAEYWGQGV	uncharacterized protein LOC115721099 [Cannabis sativa]	1731719200
HSAVVASSNnGnATATTTTTPNDTPP	trihelix transcription factor GTL1 isoform X1 [Cannabis sativa]	1731705179
HSGPQNLSGAPKRVSGnLESmGSMK	uncharacterized membrane protein At1g16860 [Cannabis sativa]	1731698192
HSKQSSTHGFDSCYTqLYqLLCSSSSVY	pentatricopeptide repeat-containing protein At2g17033 [Cannabis sativa]	1731663798
HSNDTLCAKnLEAYSmCIEnInLPHILESNCSTFLNNDKLHSQRS	serine carboxypeptidase-like 2 isoform X6 [Cannabis sativa]	1731693113
HSNGDLTEGTRnHRYqEEPVAH	paired amphipathic helix protein Sin3-like 4 isoform X3 [Cannabis sativa]	1731692963
HSNLKqqIMqEFHSSPVAGHAG	uncharacterized protein LOC115696659 [Cannabis sativa]	1731735612
HSNLSGEqSNAHNRPTRGDVGIqGqKCDLLDWTGS	uncharacterized protein LOC115696811 [Cannabis sativa]	1731735858
HSVGSYELGSSYSFDRKRLMREKSSASLYRTSSSKmEq	LOW QUALITY PROTEIN: protein OBERON 4-like [Cannabis sativa]	1731707694
HTDVMALGNnnVDSAADPNPKETQTYNLSS	uncharacterized protein LOC115725629 [Cannabis sativa]	1731731624
HTEAARLVFDKmSVRDVVCWTSmISGYA	pentatricopeptide repeat-containing protein At4g21065 [Cannabis sativa]	1731704813
HVmSLISPSNTFmDLNIGIALWLAAGGDGWMHEnY	asparagine synthetase domain-containing protein 1 isoform X2 [Cannabis sativa]	1731745896
HVnSGPSMQLQGSASTAMQSHVHRPEPSSQQLHnN	probable WRKY transcription factor 2 [Cannabis sativa]	1731729781
HVSLPPKGGnSGGCGHELLnVRERnECNECFGSSKRY	probable serine/threonine-protein kinase drkD [Cannabis sativa]	1731706201
HVSVTMPSIEVGTVGGGTQLASQSAC	3-hydroxy-3-methylglutaryl-coenzyme A reductase 1 [Cannabis sativa]	1731671527
HWLqGPmAVIQDSLYVMSH	F-box/kelch-repeat protein SKIP30 [Cannabis sativa]	1731664504
IACADASGLSGGSCLMWNCnMDLVVNYF	uncharacterized protein LOC115718119 [Cannabis sativa]	1731709276
IAGWMSNSnPSLSHPSVAGPPPGLVqqSS	protein TOPLESS-RELATED PROTEIN 2 isoform X2 [Cannabis sativa]	1731706532
IALLGESLDSELERNTIDFLGRCQDqDGGFGGGPGQMP	protein farnesyltransferase subunit beta [Cannabis sativa]	1731745824
IDAENRQRLHEmSPDEIAQAqAEImEKM	transcriptional elongation regulator MINIYO isoform X2 [Cannabis sativa]	1731664123
IDDSVSISMWVEGHQGNVFFFQDFSDSDPFTLGIQTEWqLqqmIRFGNRSLLVSDSK	uncharacterized protein LOC115724991 [Cannabis sativa]	1731729272
IDDTNnITYLLCLDLVDTAQEWnGFDSEn	uncharacterized protein LOC115696510 [Cannabis sativa]	1731669017
IDINVIPqEISFDRSSWSDDIDWGELDKLLEANNNNKMMnESI	uncharacterized protein LOC115696402 [Cannabis sativa]	1731735168
IDVENNGPVDGTnTLLVYSSPP	putative beta-D-xylosidase [Cannabis sativa]	1731726470
IECPLLFELEImnCPKmKELFmGDKKTSSSSSCSTT	uncharacterized protein LOC115695603 [Cannabis sativa]	1731733710
IEKAQNnASAYEK	ETO1-like protein 1 [Cannabis sativa]	1731663789
IELLAEFDSTmqEHVCRILRGETH	zinc finger MYM-type protein 1-like [Cannabis sativa]	1731733410
IEPNGANLPqGGSNDGLFWMDL	uncharacterized protein LOC115695982 [Cannabis sativa]	1731734628
IEQPPPqHSQQPTQISQQSNIQAS	pollen-specific leucine-rich repeat extensin-like protein 1 [Cannabis sativa]	1731689271
IFAIMTGGMSLGqTSPSLNAFA	ABC transporter B family member 9 [Cannabis sativa]	1731737620
IFEYADGSKISVqNPAALPSNPKq	translation factor GUF1 homolog, mitochondrial isoform X2 [Cannabis sativa]	1731744729
IFKDNNGRSCTSFmESVSSnEFVDKKSGGLRLKEESTY	prostatic spermine-binding protein-like [Cannabis sativa]	1731733648
IGDKVSEEHqVPIADNDT	protein TSS [Cannabis sativa]	1731682472
IGEDPVEWWSKqTTKSq	uncharacterized protein LOC115711450 [Cannabis sativa]	1731689828
IGGGAGASSGVSGGTSASGGVGGGISGGASGGARSGGGGRVGGGASAGETISGG	loricrin [Cannabis sativa]	1731665513
IGGLnKEDHLIWnKDTTGMFSVKTSY	uncharacterized protein LOC115710826 [Cannabis sativa]	1731688705
IGGSTTVDLSVECAGmLERLmLAqAQECVF	vacuolar-sorting protein BRO1 [Cannabis sativa]	1731697981
IGIDDSANQCLCKVDIK	uncharacterized protein LOC115703819 [Cannabis sativa]	1731664466
IGLGIVDALnnEKPGH	FCS-Like Zinc finger 8 isoform X2 [Cannabis sativa]	1731722983
IGPAHHLKAHGInVVmDqPmVGQGMAD	protein HOTHEAD [Cannabis sativa]	1731704402
IGQTFTWnNARDASNR	uncharacterized protein LOC115710818 [Cannabis sativa]	1731688693
IHIFVPnTDqRGHDYTEMSIAYRPSHA	chorismate synthase, chloroplastic [Cannabis sativa]	1731679635
IIGGARGGGGDNNNNNNNnnnVDLAHKLTWGSGT	WRKY transcription factor 72A [Cannabis sativa]	1731685016
IIIASnnAQDASEFKSFLH	uncharacterized protein LOC115695576 [Cannabis sativa]	1731733670
IIPIKnYPPLESCYSSVFLDFIRTEmqEmKSQAGH	zeatin O-xylosyltransferase-like [Cannabis sativa]	1731725445
IIQImKILKGEEDIEKWAnSKnICQQHDISEnQEEEDDEVYPN	pto-interacting protein 1 isoform X3 [Cannabis sativa]	1731664758
IKCEGnCGFSWGqLLqLKHQSLIY	growth-regulating factor 9 [Cannabis sativa]	1731678655
IKDDNQDRNGAqEPSTQDGNPIGKmGmQQ	probable indole-3-pyruvate monooxygenase YUCCA10 [Cannabis sativa]	1731712907
IKGPSATAEYSSKLQTEGSCNDYTSRCVSVCqSDTKLGY	LOW QUALITY PROTEIN: uncharacterized protein LOC115706064 [Cannabis sativa]	1731677889
IKPMVQASNNNNNNNNNNNNNNNHKQIEDLNNTESn	MADS-box protein SOC1 [Cannabis sativa]	1731680115
IKqQTTKADFLMWAQLEMDVmmHNHSNSTQPLKPmTT	uncharacterized protein LOC115702249 [Cannabis sativa]	1731663150
IKVDLNGnGEFKSVQ	probable pectinesterase 67, partial [Cannabis sativa]	1731725026
IKWSEYLHSPFLLGGGISNTnnQNSSSSS	transcription factor MYB61 isoform X1 [Cannabis sativa]	1731713861
ILAEEnEKKEEDLDPRVqDERn	uncharacterized protein LOC115710864 [Cannabis sativa]	1731688767
ILCnmRHnnIVNLLGYCAEMGERLLVYE	LOW QUALITY PROTEIN: serine/threonine-protein kinase-like protein CCR2 [Cannabis sativa]	1731674866
ILGGGQNGnInNNNIINGENFKMGEWDFEGLIQ	transcription factor MYB83 [Cannabis sativa]	1731684928
ILIRDSEVSGKHAmINWNLNDSRWELRDm	protein phosphatase 2C 70 [Cannabis sativa]	1731724191
ILNVMnKDGTLNNVAGLYC	valine--tRNA ligase, chloroplastic/mitochondrial 2 isoform X3 [Cannabis sativa]	1731662800
ILSEAWLPDEVNPYIDSVHPG	uncharacterized protein LOC115723497 [Cannabis sativa]	1731725030
IMDSTKAQqMFNGDYIFYLSTLHSqR	uncharacterized protein LOC115717961 [Cannabis sativa]	1731709010
IMEnILEEYPnSDLFLHSPL	uncharacterized protein LOC115713937 [Cannabis sativa]	1731667238
INARmRPHqSVHDHLLQmTSYFQEIQNHGAVnSSES	uncharacterized protein LOC115695285 [Cannabis sativa]	1731733178
INGGGASTGGRSNNNNNnTnLnLLEQNHNNGGSSNK	zinc-finger homeodomain protein 9 [Cannabis sativa]	1731744192
INGGSGGGGGGGHQEI	LOB domain-containing protein 16-like [Cannabis sativa]	1731696936
INGNHKSNMLqVMRVGNMASQKENK	transcription factor MYB52 [Cannabis sativa]	1731691631
INNINNNNNnnSSYnSNHIIPQHHQQQQQQHSTPPT	NAC transcription factor 25 [Cannabis sativa]	1731738430
InPnGIRSSEKVGGYTTTNHNNTTSF	uncharacterized protein LOC115705365 [Cannabis sativa]	1731676170
INTDLGLSnSmT	uncharacterized protein LOC115723868 [Cannabis sativa]	1731725638
INVPSAIPGTAAPASSmGAPSQAPPGMYQANPA	U1 small nuclear ribonucleoprotein C [Cannabis sativa]	1731724181
IPLGGqMDTmADAASYANnSGLCGMQIHVLCSDQKLSPPRVVEEEHDES	receptor-like protein 46 isoform X2 [Cannabis sativa]	1731731031
IPTnGAEIGGAFGGEKATGGGREAGSDSWKQYmRRSTCTI	aldehyde dehydrogenase family 7 member A1 [Cannabis sativa]	1731679009
IqGKASLLAAVDYYVSMHSDIFISASPGNmHnAMVGHR	O-fucosyltransferase 31 [Cannabis sativa]	1731697184
IqKAGVDHKINFIESAASCALDD	flavonoid 3',5'-methyltransferase isoform X2 [Cannabis sativa]	1731693130
IQKHYEETGEDEIAQLIDmFC	protein PLASTID TRANSCRIPTIONALLY ACTIVE 12, chloroplastic [Cannabis sativa]	1731738376
IqLVVTSPLmRTmQTAmGVFGGDCSTI	phosphoglycerate mutase-like protein 1 [Cannabis sativa]	1731709158
IQQSDEESLSHNGQYQLQQQHLLIQQSDQSTNEELLSHNGDYqLqLQ	NAC domain-containing protein 1-like [Cannabis sativa]	1731715401
IqqYnVTSLITVPAMMADLSSSTR	2-succinylbenzoate--CoA ligase, chloroplastic/peroxisomal isoform X3 [Cannabis sativa]	1731736771
IQVGNACWELYCLEHGIQPDGqMPSDKTVGGGDDAFNTFFSETGAGKHVPRAVFVD	tubulin alpha-3 chain [Cannabis sativa]	1731691308
IqVISHYDSFDEYLKVVDAFMDIILQNHMDNH	VPS35 endosomal protein sorting factor-like [Cannabis sativa]	1731730725
IqYPEAFFKTDYYKYGFnPEVGSVGmP	mannosylglycoprotein endo-beta-mannosidase [Cannabis sativa]	1731711265
IRGGVAGMKDSSSSHENKDGRILGNNNKIMNYnYKRDHEYEHDDE	uncharacterized protein LOC115702382 [Cannabis sativa]	1731670679
IRLqRnLPGFDPnTRHCLYGLD	uncharacterized protein LOC115716957 isoform X2 [Cannabis sativa]	1731706938
IRSEVNMISMFGqVIqECK	uncharacterized protein LOC115704107 [Cannabis sativa]	1731673637
ISAAAAVAVAAVTSAADESEKTCSK	protein ALP1-like [Cannabis sativa]	1731665204
ISSACSEFKGIGAENSKmLSSWDQ	uncharacterized protein LOC115707971 [Cannabis sativa]	1731682713
ISSLPTnPPRAKKPRPSCSnCGK	uncharacterized protein LOC115719978 [Cannabis sativa]	1731715808
ISVHGVLEPFSSLDPEDVHqGWNSIQAPTCNAmSVL	fasciclin-like arabinogalactan protein 21 [Cannabis sativa]	1731746715
ISVVFDHAEHEEVYqTCInGFLAV	ARF guanine-nucleotide exchange factor GNOM [Cannabis sativa]	1731681915
ISWGGFnVDYQDDNGFSAVmITAMKGHVE	ankyrin repeat domain-containing protein 50 [Cannabis sativa]	1731746348
ITPGFqNNIASSFRGVDDFFTEEDIRMRSHEmLENEDmQQLL	calmodulin-binding protein 60 D isoform X2 [Cannabis sativa]	1731680002
IVAADqSDFISIDCGATEDYnDqITGIKYSRDVY	putative leucine-rich repeat receptor-like serine/threonine-protein kinase At2g19230 [Cannabis sativa]	1731674417
IVRVSLVSSKqIKENSSNGAKEKSTGKmKKDSSKSKqTKKLKKLEELP	putative B3 domain-containing protein At5g58280 [Cannabis sativa]	1731709995
KAATLEmKQnRIQCQQNFQKNmQIFQQ	uncharacterized protein LOC115720327 [Cannabis sativa]	1731716683
KADHDGWTPRALADqqGHEEIK	potassium channel AKT1 isoform X2 [Cannabis sativa]	1731678231
KDATGSTTASGAGGGSSqAAVAnGEQIH	nuclear transcription factor Y subunit B-3 isoform X2 [Cannabis sativa]	1731680181
KDGHPSIYSGDLSPSqRANPSRSADCSHWCLPGLPDTWNqLFY	protein PMR5 [Cannabis sativa]	1731715290
KDHSEqKASVAEGKGKTGEAISVEqnSG	putative E3 ubiquitin-protein ligase RING1a [Cannabis sativa]	1731742385
KDMNGRGLDCSAmIPNSAPRS	LOW QUALITY PROTEIN: BRCA1-associated RING domain protein 1 [Cannabis sativa]	1731694707
KEDGGWGESYLSCPNKAYVALEGNRSNLVHTSWAMmGLIHT	beta-amyrin synthase [Cannabis sativa]	1731696571
KEDGHKIYKEMVQRGCPPDLmLLnTYMDC	pentatricopeptide repeat-containing protein At3g06920 [Cannabis sativa]	1731724942
KEGNTQDERQEQNNEDHLKQTEEESTPVERQGPNNKDHLKqTE	uncharacterized protein LOC115706989 isoform X4 [Cannabis sativa]	1731680223
KEGYQGNPYLPTGCKEInECLSSGPINCTKTQ	putative wall-associated receptor kinase-like 16 [Cannabis sativa]	1731697123
KGLPSqYLGIFNASDNSGNSSNHIFAVEFDTVQDFEFGDINDNHV	L-type lectin-domain containing receptor kinase S.4-like [Cannabis sativa]	1731737909
KGLqHYEmLGEIFTnTTATGGMSCTSTqPPPISVEE	uncharacterized protein LOC115695777 [Cannabis sativa]	1731734121
KGLQNqVKKLHTELENCTCGCKq	transcription factor bHLH128 [Cannabis sativa]	1731724142
KGmWSEVDRVRDmMSqKGLRKnPGCSWI	LOW QUALITY PROTEIN: pentatricopeptide repeat-containing protein At1g20230-like [Cannabis sativa]	1731678271
KGNFNSTTDHnSnMAFAIQGDKGNSSKNNTQGNKPNPP	uncharacterized protein LOC115719569 [Cannabis sativa]	1731714346
KGPGHSDqTTEInLWERLGTAAMM	dual specificity protein phosphatase PHS1 isoform X3 [Cannabis sativa]	1731676888
KGVEDTDKPENATMIPFYDENLYMLnMK	uncharacterized protein LOC115724973 [Cannabis sativa]	1731729210
KGVLITnPSNPCGTTMT	1-aminocyclopropane-1-carboxylate synthase 9-like [Cannabis sativa]	1731668999
KHNDSLKnDFQRTAADGGKKnnEQRNLPSSNEQS	uncharacterized protein LOC115716782 [Cannabis sativa]	1731706517
KImLCEDRqHDmqKAAAFVKRLATFSLCFGSAEAMAA	nucleolar complex protein 3 homolog [Cannabis sativa]	1731685216
KIVDQImTSASSSRATnIIRnHDFSQGLHSWHAnSCSAIVASFDSEEVAEKS	endo-1,4-beta-xylanase 1 [Cannabis sativa]	1731666344
KKKGGGGGGDGGqnVEAEGGMVMMDEI	heavy metal-associated isoprenylated plant protein 3 [Cannabis sativa]	1731718058
KLEVQVPVEEPKLTEDDCTVSNRSQPITGDEIYKNqSENFYDAPSLmQDATRDD	uncharacterized protein LOC115710278 isoform X2 [Cannabis sativa]	1731687803
KLKGYDEVDLTMFSHqmYSmNGTQLIRFVYPRKGETWALFQNWDINWSSDP	uncharacterized protein LOC115699617 [Cannabis sativa]	1731742687
KLKQEGSGYGGDWAVqVDVqKDEGMqSEDSGGAGHLFFY	mannosyl-oligosaccharide glucosidase GCS1 isoform X2 [Cannabis sativa]	1731692772
KLLEALDWKLMNESESSMKTNSNEMIEELHGDDNLVSNKEPGLPWqSSISEEnE	kinesin-like protein KIN-12E [Cannabis sativa]	1731713912
KLmASFWWKSnTSnGRGIIWMS	uncharacterized protein LOC115695272 [Cannabis sativa]	1731733158
KLNVEDmIDLTAFLDPSTGCSVIPSP	nudix hydrolase 14, chloroplastic [Cannabis sativa]	1731705568
KLTFEPPPIYCTPCGARIKRnAMYYCMGA	histone acetyltransferase HAC1 isoform X4 [Cannabis sativa]	1731693398
KLTKEQVAMLKGKSKEDGNTVNYSSYEm	shikimate O-hydroxycinnamoyltransferase [Cannabis sativa]	1731682679
KmHKLNIKPnVVTFS	pentatricopeptide repeat-containing protein At2g31400, chloroplastic [Cannabis sativa]	1731663503
KmYPDFGYMEKSTTSETLITGVA	metallothionein-like protein type 2 [Cannabis sativa]	1731737199
KNFELSIVASDLTDVGSnGVDGKVnKM	phosphatidylinositol 4-kinase gamma 4 [Cannabis sativa]	1731676677
KNIFYKmPVLDIVCWnSmIAGFSLnS	pentatricopeptide repeat-containing protein At4g20770 [Cannabis sativa]	1731739792
KNLTTLVGYCNEGSNIGLLYEYmAM	putative leucine-rich repeat receptor-like serine/threonine-protein kinase At2g19230 [Cannabis sativa]	1731681777
KNmWPMLILnESTSSSSSSVTnTnVYHNFYTF	uncharacterized protein LOC115697628 [Cannabis sativa]	1731737873
KNNTSNMTTATPTPTPSTmAFSHSVMDQVEKQRQEIDHYMKFqN	probable BOI-related E3 ubiquitin-protein ligase 2 [Cannabis sativa]	1731664764
KNPSSLnLLTEGWDGSPqLG	growth-regulating factor 1 isoform X2 [Cannabis sativa]	1731697002
KPDISQLPFPTY	50S ribosomal protein L3-2, mitochondrial [Cannabis sativa]	1731724864
KPEPmSNGqNKPNPPNNPGNqGLQPPPLE	uncharacterized protein LOC115695004 [Cannabis sativa]	1731732713
KPETnTIKVnVDAAIFASENQYGYGmVARNNSGSLIDATAHCSNGAFTP	uncharacterized protein LOC115704131 [Cannabis sativa]	1731673677
KPGqGSKWDKGYD	uncharacterized protein LOC115702995 [Cannabis sativa]	1731671906
KPKGnESGLKGDGFFDGLSQL	uncharacterized protein LOC115696493 [Cannabis sativa]	1731735330
KPLGYNSDIFmYRGNTPFCSKECR	FCS-Like Zinc finger 3 [Cannabis sativa]	1731666236
KPmqDSLITVLPnASSDDKACTFVGTAA	3-phosphoinositide-dependent protein kinase 2 [Cannabis sativa]	1731677899
KPSTPFDHGAGHVDPIAAHDPGLVYDL	subtilisin-like protease SBT1.7 [Cannabis sativa]	1731692524
KPVnYDNPKFDHYNmRARY	uncharacterized protein LOC115697683 isoform X2 [Cannabis sativa]	1731737988
KQNGSEFNGFTNNNNNNNNINYKPKANSEHFN	B2 protein [Cannabis sativa]	1731707347
KqSDDEPqPQPANNnAKVSLSLSPSHPSAASA	U-box domain-containing protein 52 isoform X2 [Cannabis sativa]	1731669989
KQTPqPQPKPTSPAP	polygalacturonase [Cannabis sativa]	1731692874
KqVmSGVHSqKGqLNMSEVSKDTSLTAELGC	transcription factor bHLH49 [Cannabis sativa]	1731742425
KRNGSSTCRTqTDTqnYPFERSGSRRQWKDVWKQ	uncharacterized protein LOC115721283 [Cannabis sativa]	1731719821
KRNSENNLmNGYRGFGANqTGTGNGVDGVGSAYEIRKGNADMnKTFETY	uncharacterized protein LOC115716004 [Cannabis sativa]	1731704552
KRVDELLTPNSDLNSEISSQDQTLSLNK	uncharacterized protein LOC115716575 isoform X5 [Cannabis sativa]	1731705987
KRVDVNLLCPICMEEEE	uncharacterized protein LOC115717738 [Cannabis sativa]	1731708632
KSASIRGmSFIDDSDSLSGDDFVHPSTEVIE	uncharacterized protein LOC115700592 isoform X2 [Cannabis sativa]	1731670092
KSGmTnGKRRGLRQKHTGSTCEDnLDELATNFCEPTLHDVENPTEL	uncharacterized protein LOC115700533 isoform X6 [Cannabis sativa]	1731744351
KSHVmTLqDEIKRmqNQMTETLE	golgin subfamily B member 1 [Cannabis sativa]	1731720964
KTETVAVSETmEIDDEKqSMEVDVEKQHS	LOW QUALITY PROTEIN: uncharacterized protein LOC115721872 [Cannabis sativa]	1731720972
KTGSASAnFTGVDDEKAEnNSGEKD	uncharacterized protein LOC115720271 [Cannabis sativa]	1731716536
KTqCLVSSNGCVVLTGNRIVDqCYAVC	uncharacterized protein LOC115720224 [Cannabis sativa]	1731716417
KTRSSDGEqEqPTFPPPFRNSAGHDGPTVESCESSS	ubiquitin carboxyl-terminal hydrolase 16 isoform X2 [Cannabis sativa]	1731667687
KVHNqqPQRTPTDREGDSNPEWNHEMnFLVDEEEASES	protein SRC2 [Cannabis sativa]	1731689616
KVPDEIFWKMQETmVSKLNQmLTDADVAFNVLTASC	RNA-dependent RNA polymerase 6 [Cannabis sativa]	1731705916
KVSNGDEFnGFAIPnqTLSEAFS	probable inactive leucine-rich repeat receptor-like protein kinase At3g03770 isoform X2 [Cannabis sativa]	1731742769
KVTMWSESFNHVWDPnGDLFFLIP	protein DMR6-LIKE OXYGENASE 2-like [Cannabis sativa]	1731695161
KVVnGDEnENMAARGEDNTKQSSDVQSSm	uncharacterized protein LOC115720585 [Cannabis sativa]	1731717332
KWREEnDLSWPPGFPPKCGNVKGRESDPEDNLTLKEMFNGVDTDE	uncharacterized protein LOC115705032 [Cannabis sativa]	1731675343
KYqATGDGDQQIMIKELKMLCEECRSnICIEHATGIm	signal recognition particle subunit SRP68-like isoform X1 [Cannabis sativa]	1731687323
LAAnHLqREIMVRDSnR	pentatricopeptide repeat-containing protein At1g71420 [Cannabis sativa]	1731720732
LAASKKQSEnDnSTTPQLR	protein NETWORKED 2D [Cannabis sativa]	1731692753
LAASSqLLWCIIGDLNNIGDqSE	uncharacterized protein LOC115713283 [Cannabis sativa]	1731693726
LAKEEqmDGEVVTRLqSFNA	calcium and calcium/calmodulin-dependent serine/threonine-protein kinase [Cannabis sativa]	1731729859
LANNHASAITnERTEn	uncharacterized protein LOC115725049 isoform X2 [Cannabis sativa]	1731729531
LATNIYRFIFLNNmVPHNFCSnWAqDIFFA	UPF0481 protein At3g47200 [Cannabis sativa]	1731728666
LATSPnVmPLYVHYESGEPNSVSSWLECWSSTYFWKPV	protein IQ-DOMAIN 31 [Cannabis sativa]	1731686958
LCFnVALnRLPASnSSPmLGGHHHH	protein SMAX1-LIKE 3 [Cannabis sativa]	1731745713
LDAAGEGDEYNE	myosin-binding protein 3 isoform X2 [Cannabis sativa]	1731741679
LDDDVMAGGGGVVGNLDSAAAAAAAAAQPGGFGn	RNA polymerase II degradation factor 1 [Cannabis sativa]	1731687307
LDGGHDLPFPDGLLINGRGSnGnTF	L-ascorbate oxidase homolog [Cannabis sativa]	1731740933
LDHYSCMVDLLGRSGHLNDAYELITSMSMEPnSGVWGALFGACRVYG	pentatricopeptide repeat-containing protein At5g40410, mitochondrial-like [Cannabis sativa]	1731710250
LDIEHVDPTFKTAYHFqPqKHWINDPNGPMYFNGVYHLFYq	beta-fructofuranosidase, insoluble isoenzyme 1 [Cannabis sativa]	1731742347
LDLVDEILNNCSSLATnGGPFG	protein ACCELERATED CELL DEATH 6-like [Cannabis sativa]	1731668927
LDVTSLKPDGEKSDYFSqDASRSCRG	DNA repair protein RAD4 isoform X2 [Cannabis sativa]	1731741673
LEAAqNLPmNLEATqYLADEVAqNLHQN	uncharacterized protein LOC115703996 [Cannabis sativa]	1731673458
LEESVDMFMmILGHGAGNRmIQEHFqHSG	uncharacterized protein LOC115723860 [Cannabis sativa]	1731725624
LEGDVECLEIPPKPSLYPQESYN	rust resistance kinase Lr10-like [Cannabis sativa]	1731728525
LEGHnKDVSVnSVVVSEDGKWIYSGGSDGYLmGW	protein JINGUBANG [Cannabis sativa]	1731685770
LEGnKEEKPEEInISGFSFMATAAKSVqH	DNA topoisomerase 2-binding protein 1 [Cannabis sativa]	1731687479
LEKmFSSFTIGqCSSPGLPERNGLTE	auxin-responsive protein IAA27 [Cannabis sativa]	1731681557
LESIDMMSSLYEnSFPMRFGVILYSSKLVKQFEnGGGEMHSSTEKDNQ	UDP-glucose:glycoprotein glucosyltransferase [Cannabis sativa]	1731731212
LEVLDmAGNDITAEAAPALAACISSMKH	RAN GTPase-activating protein 2 [Cannabis sativa]	1731721894
LFCCACRDQVYDRDFDAAVVLAQTAASTLG	ubiquitin C-terminal hydrolase 22 [Cannabis sativa]	1731731763
LFRLCPFWQSGGqTGSSSSSNNN	vesicle-associated protein 4-1 [Cannabis sativa]	1731731333
LFSYSCGGGLLMDQLRSVVDRAq	glycosyltransferase family protein 64 C3 [Cannabis sativa]	1731665794
LGAGRTEGSmDAAnLFKPm	chaperone protein ClpB1 [Cannabis sativa]	1731677428
LGFGCGGLSGmLNAPLPHE	perakine reductase isoform X2 [Cannabis sativa]	1731723410
LGGLDGILEnnITRMLAN	protein NRT1/ PTR FAMILY 5.5 [Cannabis sativa]	1731735035
LGNISMVEGLPVSSMSMES	protein PHR1-LIKE 3 isoform X2 [Cannabis sativa]	1731722353
LGNMSFGSPFTGqPINMMNMPFSLPL	ninja-family protein mc410 [Cannabis sativa]	1731674632
LGqISCSCGNAKSIVISGP	LOW QUALITY PROTEIN: tRNA (guanine(26)-N(2))-dimethyltransferase [Cannabis sativa]	1731675836
LGSEFSLSQELmQELAFGIE	UDP-glycosyltransferase 91C1-like [Cannabis sativa]	1731663127
LGSqAGmGGGMNPGGIPMQRG	cyclin-dependent kinase E-1 isoform X2 [Cannabis sativa]	1731692414
LGTHTSEnEPnYLmLAqVQLP	WD-40 repeat-containing protein MSI1 [Cannabis sativa]	1731737322
LHMAALNGYFDCVQLLLDLHAN	LOW QUALITY PROTEIN: E3 ubiquitin-protein ligase XBAT33-like [Cannabis sativa]	1731707227
LHNFGGnIEMYGVLDSVSSGPIDARTSEnSTMVGVGMCM	alpha-N-acetylglucosaminidase [Cannabis sativa]	1731686747
LIqDEqFGNDGYGVTKSILVTPTPPS	uncharacterized protein LOC115711366 [Cannabis sativa]	1731689640
LIRGYqLSRnSPPVSHL	uncharacterized protein LOC115711018 [Cannabis sativa]	1731689000
LISLSSSNPNNNNNNNNSFGNPTQNYS	protein indeterminate-domain 4, chloroplastic [Cannabis sativa]	1731724061
LISnPDEVnLPGPSqSVTSAFA	peroxidase 57 [Cannabis sativa]	1731724576
LKEAGDMILDMqnQGLMLTT	pentatricopeptide repeat-containing protein At4g19890 [Cannabis sativa]	1731687860
LKGHWSSSqEQEANSHLVVGCSDNSVLLWDMSnSSVVLHV	uncharacterized protein LOC115717827 [Cannabis sativa]	1731708780
LKGKVMELFDENEIQNCCNQYNVSTGY	uncharacterized protein LOC115710950 [Cannabis sativa]	1731688895
LKnCCEVPPVTCIVTDGVmTFGIEAAREFGI	linamarin synthase 2 [Cannabis sativa]	1731690946
LKTCSKLVLTGFCDADWAS	uncharacterized protein LOC115718013 [Cannabis sativa]	1731709096
LKVPPSSnNNNNmAEELVTKm	stemmadenine O-acetyltransferase-like [Cannabis sativa]	1731693496
LKVWMHNNKSTMMKTKPNNINNNNNQDMnRVVLMnDDnNMVASN	zinc-finger homeodomain protein 5 isoform X3 [Cannabis sativa]	1731670166
LLCVQESSSDRPTMPNVVFmLG	G-type lectin S-receptor-like serine/threonine-protein kinase At4g03230 [Cannabis sativa]	1731740529
LLEEEGFKVDAVDLNGSGVqSSDSnSI	putative methylesterase 11, chloroplastic [Cannabis sativa]	1731740536
LLGHNSHNLSATTTnATTTTTTTS	AP2-like ethylene-responsive transcription factor AIL5 isoform X2 [Cannabis sativa]	1731733933
LLHSESGSYSqVDLnRAGVPLLEIVSEPDmRTGI	glutamyl-tRNA(Gln) amidotransferase subunit B, chloroplastic/mitochondrial [Cannabis sativa]	1731724966
LLNHKMFSVqIGSHFSPD	F-box protein At5g07670 [Cannabis sativa]	1731673523
LLnWLELnGEDDESGSTATVILVGNDmmFVSHI	protein phosphatase 2C 57 [Cannabis sativa]	1731706478
LLPNENPmNEMSNNMTNLVVPSTqYGF	putative two-component response regulator ARR21 [Cannabis sativa]	1731708377
LLSGGGAPDqGENDPSFWLNDPTS	transcription factor MYC2 [Cannabis sativa]	1731707246
LMKLLELCTYVGSInHSYE	uncharacterized protein LOC115719434 isoform X2 [Cannabis sativa]	1731713788
LMKSADFGICVAnNFCDCLSLP	uncharacterized protein LOC115705349 [Cannabis sativa]	1731676128
LMPSmQHmPPVSHVqQSSPmTSVQQ	glutenin, low molecular weight subunit-like [Cannabis sativa]	1731732941
LMSLYDTNAQqRNKGLNPGNHSVPTNmENHTQPQQKYQFQMDDS	ETHYLENE INSENSITIVE 3-like 1 protein [Cannabis sativa]	1731677916
LNAILnAnEKQGGREFTAHE	uncharacterized protein LOC115713468 [Cannabis sativa]	1731694031
LNDFGSMDSFINSLNNCTTnINTQNQTHHIDHDYSFSSQNNQSFKV	ethylene-responsive transcription factor 5-like [Cannabis sativa]	1731725790
LNGDLNEVVYmQqP	uncharacterized protein LOC115695441 [Cannabis sativa]	1731733436
LNLQGNKLnGSIPnTm	leucine-rich repeat receptor-like tyrosine-protein kinase PXC3 [Cannabis sativa]	1731744322
LNLSLnSTSSSSSSSnNINTIAGDSDQLQQPRQS	zinc finger protein 4 [Cannabis sativa]	1731671989
LnnRRPRPRSDDDDDmGMAKKGQVVLNAKPHFMTWTTDDLLHV	phosphatidylcholine:diacylglycerol cholinephosphotransferase 1 [Cannabis sativa]	1731676062
LNPIQSGCCKPPTQCGYTFVNPTYWISPINNAADmDCLAWNND	protein TORNADO 2 [Cannabis sativa]	1731708128
LnQWKFAQSCRFEPIHLNSNCYGS	uncharacterized protein LOC115699889 [Cannabis sativa]	1731743270
LnRGSDPnEPDVNGRTAmHIAAANGNEHCVVLL	potassium channel AKT1 [Cannabis sativa]	1731665394
LnSAKEAEMHVLqMIqDGEIF	COP9 signalosome complex subunit 3 [Cannabis sativa]	1731746821
LNSLNSMELnSMEGVLGImSFVPQTKELNS	glutamate receptor 2.8-like [Cannabis sativa]	1731667853
LnVEVVDGGLICSSGVHVEEmGDKnDDCYIVnAAVY	uncharacterized protein LOC115698008 [Cannabis sativa]	1731738757
LNWLSLGMLGAGGTDDSSqFSGVVSDEV	uncharacterized protein LOC115714144 isoform X3 [Cannabis sativa]	1731695340
LPENINTNnnNPSSISALHQQI	high mobility group B protein 10 [Cannabis sativa]	1731732383
LPGDDCPLIWGACnHAFHLHCILKWVnSqTSQAHCPmCRREWQ	anaphase-promoting complex subunit 11 [Cannabis sativa]	1731709595
LPGVISPPSPSSEFENDEVSSPTSS	probable alpha,alpha-trehalose-phosphate synthase [UDP-forming] 11 [Cannabis sativa]	1731729094
LPnGnVLIINGGSSGTAGWEFGRDPV	aldehyde oxidase GLOX1 [Cannabis sativa]	1731670314
LPNLQTFMASNnNLEGKIPDQFQDCPSLS	leucine-rich repeat receptor-like protein kinase PXL1 [Cannabis sativa]	1731717605
LPNMYVGFSSSTGmKSSSHYVLGWSFS	probable L-type lectin-domain containing receptor kinase VI.1 [Cannabis sativa]	1731739348
LPqnVVLGnSHKQKEDF	histone-lysine N-methyltransferase ASHH2 isoform X2 [Cannabis sativa]	1731669482
LPSVLAVFSTqYLDnYRAAQ	uncharacterized protein LOC115695337 [Cannabis sativa]	1731733266
LQDANREVYQSMDGGTGnQNIEFLLSSSRmNEFDERTQDFGSFR	F-box protein At3g54460 [Cannabis sativa]	1731677901
LQMYRTVKTTDKPAASSGqSE	transcription repressor KAN1 [Cannabis sativa]	1731722679
LQQGANEAAEDVYGCDDKnAIEKSmTKSSSI	ABC transporter B family member 9 [Cannabis sativa]	1731737620
LqQYNSFSARENGSVnVGESSA	TOM1-like protein 6 [Cannabis sativa]	1731736489
LQSLVAPGEmIGCVAAqSIGEPATQMTLNTF	LOW QUALITY PROTEIN: DNA-directed RNA polymerase II subunit 1-like [Cannabis sativa]	1731671400
LRGELHLAQEALRLTNNNNNNNNNnnnLSSYCTS	homeobox-leucine zipper protein ATHB-52 [Cannabis sativa]	1731737945
LRKGSRTAPGVSATVnKTKnSPQSEEmLRnSENI	uncharacterized protein LOC115704964 isoform X2 [Cannabis sativa]	1731675180
LRKLDLSNNAINGSLPTSISNLSSLVLLNLERNNLDFHIPxELGRLHN	LOW QUALITY PROTEIN: probable leucine-rich repeat receptor-like protein kinase IMK3 [Cannabis sativa]	1731674778
LRSNMAACYMQmGLGEYPRAIH	protein PHOX1 [Cannabis sativa]	1731729417
LRVRVIGEDSYANSSGPqAPqLDHQnSSTSL	autophagy-related protein 18c [Cannabis sativa]	1731673184
LSDPFDGPSGSFEELGSEDDLFCTYMDI	bZIP transcription factor 18 [Cannabis sativa]	1731679908
LSEDKEGLPVYRnmVYDSS	serine/threonine-protein kinase ATR [Cannabis sativa]	1731663796
LSHSGSLEEIGRVFEnmLSEnIH	pentatricopeptide repeat-containing protein At1g62910 isoform X2 [Cannabis sativa]	1731720569
LSnSDHPRASSVPKILnGCENYSSWRRAm	uncharacterized protein LOC115716545 [Cannabis sativa]	1731705896
LSPESSFGSPEPPFGWDSTENSLPFNEn	ethylene-responsive transcription factor 1B [Cannabis sativa]	1731723948
LTEPKNALnKqYKKmFSMnSV	CLP protease regulatory subunit CLPX2, mitochondrial isoform X2 [Cannabis sativa]	1731693239
LTPTPqVCVLLPEGEANLIGSSGCGGAmI	omega-hydroxypalmitate O-feruloyl transferase [Cannabis sativa]	1731678122
LTQANAEASPSVVTCqLSINNSF	uncharacterized protein LOC115700171 [Cannabis sativa]	1731743739
LTSIKGYFnGAHEECFRS	TMV resistance protein N isoform X3 [Cannabis sativa]	1731731507
LVGSRLGGVHqmYG	transcription factor PIF4 [Cannabis sativa]	1731663651
LVmNLDSEKGNEMRRKSFE	UDP-glycosyltransferase 92A1 [Cannabis sativa]	1731719814
LVqqAmFRIVDEFRSLmERGGESLELSRGYGN	exocyst complex component EXO70B1 [Cannabis sativa]	1731719727
LVYEYMENRSLDRWLYSKnREITNPVPGS	MDIS1-interacting receptor like kinase 1 isoform X2 [Cannabis sativa]	1731672872
LWMSYLLADWAASFTVGHISSKqNDDSGRDKGCYA	uncharacterized protein LOC115722069 [Cannabis sativa]	1731721457
LWTINDFPARSSLSGWSGQGYKACPTCNEDTTS	uncharacterized protein LOC115719150 [Cannabis sativa]	1731667914
LYNTFCLVMPRFEEGEPSTMDnRDKEAKKAWNALT	SNF2 domain-containing protein CLASSY 4 [Cannabis sativa]	1731704789
MANHELILGQNHNLALGqNqq	uncharacterized protein LOC115719009 [Cannabis sativa]	1731712163
MASFWWKSNNSNGnGSGITWMSWDRmTKHK	uncharacterized protein LOC115717569 [Cannabis sativa]	1731708335
mAVGQFFNPEEGKLDVSPWFmLQSSYS	uncharacterized protein LOC115699473 isoform X3 [Cannabis sativa]	1731742303
mCHQCQRNDKGRVVRCKKCmRKRFCIPCLKnWYPnLPEEDIAESC	lysine-specific demethylase JMJ25 isoform X2 [Cannabis sativa]	1731714655
MDAmqNVLELLSDmLqAVNPGDSAAVKDEVI	TOM1-like protein 6 [Cannabis sativa]	1731736489
mDGTLDVCARVCLIDQnEnIIFHT	RNA exonuclease 4 [Cannabis sativa]	1731745664
MEATTSNnVIAPFVmKTYQmVnDPMTDSLISWGH	heat stress transcription factor C-1 [Cannabis sativa]	1731680886
MEELqEIGnAmGWHVTLRDTAEGPHASYRLLVADKR	probable methyltransferase PMT11 [Cannabis sativa]	1731676929
mELFIHQqDqYGNLVPGLYEFDAEVIEKEAN	protein GAMETE EXPRESSED 2 [Cannabis sativa]	1731721856
MEmETEnLHFKPGSTVEVCTEEDGFLnAWFPATVLRQPTSPFSnS	DUF724 domain-containing protein 7 isoform X3 [Cannabis sativa]	1731687039
MENYLAEIASDRnLPVSKFNSLAE	BTB/POZ domain-containing protein SR1IP1 [Cannabis sativa]	1731692782
mESKWTKNSLDLNLKPFqHVTEVTDGDDDDEDVEH	probable WRKY transcription factor 40 [Cannabis sativa]	1731691976
mEVGCGSGYVITSLALLLGqESSSGVqFFATDTnPYA	methyltransferase N6AMT1 [Cannabis sativa]	1731730561
mEVGCGSGYVITSLALLLGqESSSGVqFFATDTNPYA	methyltransferase N6AMT1 [Cannabis sativa]	1731730561
MFGDFqKDTPEERNVRFGVREHGMGA	LOW QUALITY PROTEIN: transketolase, chloroplastic-like [Cannabis sativa]	1731676703
MGIFGFGSDGIGECKEENGLSnTqSIKIGSMPSEFSKYMLS	ATP-dependent DNA helicase SRS2-like protein At4g25120 [Cannabis sativa]	1731679426
MGLDHHHGLLEVQNMEVFKnDTnPSGPGVLFDVEIITEm	uncharacterized protein LOC115700201 [Cannabis sativa]	1731743787
mGLVSQEPILFnETIRDnITY	ABC transporter B family member 9 [Cannabis sativa]	1731737620
MGNSWGCFAPRREVNNLLQRRP	putative methylesterase 11, chloroplastic [Cannabis sativa]	1731740536
mGPHEPYWRTNTSFSPPPSRWDFqFHSEGLqH	uncharacterized protein LOC115699185 [Cannabis sativa]	1731741457
MHEFIISKVNDLCFCqILSQKnSEFDEn	disease resistance protein RPM1 [Cannabis sativa]	1731728507
MHPDKSPGPDGMTPAFYQKCWSIVGGDVVETVRnF	uncharacterized protein LOC115717461 [Cannabis sativa]	1731708144
mHQTSQPMCYqGYqETLPIPNQKPSNVGRGVDPK	uncharacterized protein LOC115712436 [Cannabis sativa]	1731663583
MHTGNNGIGADFLGFRSHE	heavy metal-associated isoprenylated plant protein 37-like [Cannabis sativa]	1731725620
MIEEEEVPLLKYqqE	protein DETOXIFICATION 27 isoform X1 [Cannabis sativa]	1731666884
MIGDRGIRKTPGWSmIEVEGKMnEF	pentatricopeptide repeat-containing protein At3g28660 [Cannabis sativa]	1731739630
MKCSGSLCSnTKVmHRPETGSPELHK	uncharacterized protein LOC115697242 [Cannabis sativa]	1731669151
mKRSLSFSGVDDHHHHQNInTN	homeobox-leucine zipper protein HAT7 [Cannabis sativa]	1731744085
MKYEPLFNYFMEFSDVAFRVVADnYVTDDS	isoleucine--tRNA ligase, cytoplasmic [Cannabis sativa]	1731724204
MLGQGYVWIITQDFTnLLnSLNSMELNSMEGVLGImSFV	glutamate receptor 2.8-like [Cannabis sativa]	1731667853
MLKYGFSTDqDRKDGEPDLSEYGD	methylesterase 17-like [Cannabis sativa]	1731710958
MMFPGVqHYMSRLGMAMGPPSLPSIHNPMHLPR	transcription factor PIF5 [Cannabis sativa]	1731742859
mmFSSLDINPYSLVSPCAYDTAWLAmIPHHnRPSKPMFEGCLSW	S-linalool synthase isoform X2 [Cannabis sativa]	1731734888
mNCCNGLILFSGCNESKRSFNYSYIVYNPLTnQWVDFDYVVnK	uncharacterized protein LOC115713851 [Cannabis sativa]	1731694653
mNmFGGLGAGSFAAPTNPDVPPEELYATQLSqLqEM	ubiquitin domain-containing protein DSK2b isoform X1 [Cannabis sativa]	1731664235
mNqGmFVGAAGLLGIGGGSMSFV	protein ASPARTIC PROTEASE IN GUARD CELL 2 [Cannabis sativa]	1731723952
MNQLqHEDFIQSPNPPSDPGLPS	transcription factor bHLH121 [Cannabis sativa]	1731664634
MPLGAIQSPSSAPNVMYnASGNPQPS	SWI/SNF complex subunit SWI3C isoform X2 [Cannabis sativa]	1731669813
MPSPSSSSSSATSAALAAAASLSSSSSR	ribose-phosphate pyrophosphokinase 1 [Cannabis sativa]	1731709387
MPTPDVDVPqNLPVKVPFPqA	uncharacterized protein LOC115720162 [Cannabis sativa]	1731716257
MQGFSEIGGSqDLAqLLSTMHAIEL	exportin-4 isoform X3 [Cannabis sativa]	1731712665
MqmqVEESRCGVSDKSSIVDKLRFEIETFLQA	uncharacterized protein At5g41620 [Cannabis sativa]	1731704939
mQPCSREmQGLnSLLNSSSSQISLQELQGGGQQGSQIHGSGHFESGSTH	transcription factor bHLH66 isoform X2 [Cannabis sativa]	1731730813
mRGNILSFNLGGmGCSAGIIAVDLARDMLQANPNNYAV	3-ketoacyl-CoA synthase 10 [Cannabis sativa]	1731665904
MRNNANSTPNQPKQqqQHQPQmPPHNSHSHQG	uncharacterized protein LOC115702427 [Cannabis sativa]	1731670758
mSFTSILGGNNqqLPGLELGLSQDGHI	transcription factor TCP20 [Cannabis sativa]	1731742738
mSHNLLSNTLAnFSLSQEnNVIVD	receptor-like protein EIX2 [Cannabis sativa]	1731730985
MSqITQGTDSSFYDSSASTSmVADAmPPRPASGAAQPNNV	probable LRR receptor-like serine/threonine-protein kinase At1g56140 [Cannabis sativa]	1731685048
MSRKDRRVnFSPEELNSMPmSDFLKRSVSYRASSS	uncharacterized protein LOC115697863 [Cannabis sativa]	1731738439
mSYGGPSGPSAPVDYSPYDqKPKTGKMGLGTGLAV	leucine-rich repeat extensin-like protein 1 [Cannabis sativa]	1731736420
MVEAGKNTTTTEKKTSmANTENSLKQKRKMTKQLqDDTKNTNNDEEqPTVSHS	ribosome biogenesis protein BOP1 homolog [Cannabis sativa]	1731719440
MVIGSNQGFHPAIGSPLSTSFENSLSHqSSSLPKTmPSPmRMTS	LOW QUALITY PROTEIN: protein MEI2-like 1 [Cannabis sativa]	1731676880
MVMEGmKPGLKVYSALmVAFG	pentatricopeptide repeat-containing protein At4g31850, chloroplastic [Cannabis sativa]	1731706062
MVSANGGLnQMRSGICDmVAIAKY	rhamnogalacturonan I rhamnosyltransferase 1 [Cannabis sativa]	1731742025
mVTCSPDGLVVSLGTPSqNLSGT	protein NSP-INTERACTING KINASE 2 [Cannabis sativa]	1731743064
mWGYCVEGQNKmLVYEYMEHGSLADnLKSSnSIVLDWEKRFAI	putative receptor protein kinase ZmPK1 [Cannabis sativa]	1731712671
MYNGKSLSnPNVVLDETWF	tetraketide alpha-pyrone reductase 1 isoform X2 [Cannabis sativa]	1731687071
MYTPAFYAACTLGGILSTGPTHMAV	mitochondrial phosphate carrier protein 3, mitochondrial [Cannabis sativa]	1731688356
NAGGGKKKGGGGGGDGGQNVEAEGGMVMmDEISRINqYmGq	heavy metal-associated isoprenylated plant protein 3 [Cannabis sativa]	1731718058
nAGGIAIYWGQASNEETLMATCKS	hevamine-A-like [Cannabis sativa]	1731708261
NAGYGqSGISIQnPFDQLDPFMM	putative clathrin assembly protein At5g57200 [Cannabis sativa]	1731727798
nALHPRYCADKSDSLLMDPASTSSNSDDGMKLYHGQKQPE	uncharacterized protein LOC115701422 isoform X3 [Cannabis sativa]	1731746495
nALSVRGEHPqISPQMAPSWFDQYGTFnKGGQMLPVYDMQRSVAm	uncharacterized protein LOC115709738 [Cannabis sativa]	1731686410
NANHGSNLNYGRVLSPSY	heterogeneous nuclear ribonucleoprotein 1-like [Cannabis sativa]	1731681118
NAPTADPILLQHq	uncharacterized protein LOC115710263 [Cannabis sativa]	1731687768
NAPTYPGVEHVGGDmFEKIPN	caffeic acid 3-O-methyltransferase [Cannabis sativa]	1731738013
NAPVnGQQPGQGGGnHEVP	uncharacterized protein LOC115713220 [Cannabis sativa]	1731693624
NAPWIILGDFnAmFAYKDRS	uncharacterized protein LOC115696678 [Cannabis sativa]	1731735646
NAqPLPQVTLVDSDDEGEVFDEN	uncharacterized protein LOC115720111 [Cannabis sativa]	1731716137
nASKCLGGLPTTGALGSFPKTSCLGVYDIIETnEYmAHE	uncharacterized protein LOC115719402 isoform X3 [Cannabis sativa]	1731663785
NAVPGAnAGGAAnGGNNQFVTTSLYVG	polyadenylate-binding protein 8 [Cannabis sativa]	1731671835
NCmPSRSKVDSFmSGKSTDEKnRDQQVAPVGSSTSTSNIESTIS	probable serine/threonine-protein kinase PIX7 isoform X2 [Cannabis sativa]	1731739644
NDYQKNRFVNRVVSSMFNTVSn	UDP-glucose 6-dehydrogenase 1 [Cannabis sativa]	1731744822
NEATIKFDIWDTAGqERY	ras-related protein RHN1 isoform X2 [Cannabis sativa]	1731672730
NEEMKPVINNNNNHIHHIKmNNNNNKNInHHHqDQDTQDQH	transcription factor JUNGBRUNNEN 1 [Cannabis sativa]	1731687782
NEETAPAPSPTLnGGnmLRLq	lysine-rich arabinogalactan protein 19 [Cannabis sativa]	1731687275
NELRDAnGNWVSWDSGLPSVVADYFNNL	uncharacterized protein LOC115722620 [Cannabis sativa]	1731722790
NFMSHDGTnGTRKMKRYTSAMPLnVVSSASSINDSEISELESTATSG	mediator of RNA polymerase II transcription subunit 15a isoform X2 [Cannabis sativa]	1731683144
NGELVTDLQGISGCF	uncharacterized protein LOC115720302 [Cannabis sativa]	1731716619
NGFSMGLPYELFQGNILGNmVCNTTTNTSTDQSSMMTRNKIHE	protein FEZ [Cannabis sativa]	1731740136
NGGGKYIGNPImSVTn	spermidine hydroxycinnamoyl transferase-like [Cannabis sativa]	1731705888
nGGLSVSLAGPDGRVIGGGLAG	AT-hook motif nuclear-localized protein 7 [Cannabis sativa]	1731689661
NGGYSqLNGGDSSGKQEWSHHLLERPMSSHKnKDEPm	probable serine/threonine-protein kinase At1g09600 [Cannabis sativa]	1731692599
nGILVnQEDGCVFT	protein JINGUBANG [Cannabis sativa]	1731664923
NGMPREGVEFF	putative pentatricopeptide repeat-containing protein At3g08820 [Cannabis sativa]	1731736095
NGNSKVKSIALELLKYFGQTTCCSAS	U-box domain-containing protein 5 [Cannabis sativa]	1731670174
NGVIAERGRASNLGYPGEGPSNNEAYYFHGREqqMSSNAPRVNVPNG	uncharacterized protein LOC115716749 [Cannabis sativa]	1731706442
NHGGGGGGGLYALMqGNHRGK	LOW QUALITY PROTEIN: protein OBERON 3-like [Cannabis sativa]	1731721868
nHPSLSSSSqIGEDDASGISRTSSMRSqF	uncharacterized protein At4g15545 isoform X1 [Cannabis sativa]	1731696361
NHSRGGqASLPAAVTGF	uncharacterized protein LOC115718480 [Cannabis sativa]	1731709944
NIADnPTNVQLPGmYNKQENP	ribulose bisphosphate carboxylase/oxygenase activase 2, chloroplastic [Cannabis sativa]	1731739257
NICYNCLDKnVEAGLGDKIALYW	acetyl-coenzyme A synthetase, chloroplastic/glyoxysomal [Cannabis sativa]	1731740271
nIGGGGGGGDGDGRTGTGTR	probable trehalose-phosphate phosphatase D [Cannabis sativa]	1731669387
NILLnSDYEAHVADFGLAKFLRPDnnGNGTSECMSAIAGSY	leucine-rich repeat receptor-like serine/threonine-protein kinase BAM3 [Cannabis sativa]	1731737438
NIVSSNLATNFNQPKETSSALSSIGYSSnVDSINDDTFPNISQDRSSMPVL	uncharacterized protein LOC115714973 [Cannabis sativa]	1731697416
NKDINNNNEGTSNGnQnIGAKTF	probable serine/threonine-protein kinase PBL25 [Cannabis sativa]	1731691775
NKGNqVSLLDGNCSIRLVGSISnSD	VIN3-like protein 2 isoform X2 [Cannabis sativa]	1731729289
NKKHnRnSETNSPFSSRPATPTYGMSPVHL	MLO-like protein 12 [Cannabis sativa]	1731677392
NLASQRESSYTPTSLSPSSFETTIPESTEDPQSSHQPFLQE	syntaxin-22 [Cannabis sativa]	1731743971
nLEATqYLADEVAQnLHQ	uncharacterized protein LOC115703996 [Cannabis sativa]	1731673458
NLGPVSGDmNNAVLNSVAnSGPSVGASSLVTDAnSALSGG	probable transcriptional regulator SLK2 isoform X1 [Cannabis sativa]	1731706166
NLHYEEYRKEMNNAmEIDDRDVKNQTSnQIKR	probable RNA-dependent RNA polymerase 3 [Cannabis sativa]	1731677259
nLISGTFGGNNLNDLDLGQEIKFCGFA	uncharacterized protein LOC115717026 isoform X3 [Cannabis sativa]	1731707114
nLMFqTSIGPSGLSSGFmRPETAq	glycine--tRNA ligase, mitochondrial 1 [Cannabis sativa]	1731728544
NLNAIGQnSSmQLGnHIGnKSSALN	protein PHYTOCHROME-DEPENDENT LATE-FLOWERING [Cannabis sativa]	1731680622
nLPIRVPFFYEDDHKENSSSLSSET	LOW QUALITY PROTEIN: uncharacterized acetyltransferase At3g50280-like [Cannabis sativa]	1731706877
NLTIPSSSPPTSSAAqDFDFNDVFGPPTPSTSTSNPFHGDPQPQPL	serine/threonine-protein kinase AtPK1/AtPK6 [Cannabis sativa]	1731686974
NLTVYGVAqCAqTVSRSGCLDCLKVAYVNLQNCLPDSDGRA	cold-responsive protein kinase 1 isoform X2 [Cannabis sativa]	1731737278
nLYPRGGGGMVQGGQDVLAGnGLKQVmSGVHSQ	transcription factor bHLH49 [Cannabis sativa]	1731742425
NMEILqSLqTqAEEFLDAANATPEISTLRN	PH, RCC1 and FYVE domains-containing protein 1 [Cannabis sativa]	1731721545
nmVFEEKQKNSNVVTPGKNDDGFFL	protein CHROMATIN REMODELING 20 isoform X2 [Cannabis sativa]	1731718922
NnAYKLAQYKNGSSmSSQIDVA	protein transport protein sec24 [Cannabis sativa]	1731713906
NNFTIDNSNnSTLLSGLICLqKDFPCn	uncharacterized protein LOC115709592 [Cannabis sativa]	1731686027
NNHGEPPMMKISHNLSFS	uncharacterized protein LOC115717198 [Cannabis sativa]	1731707539
NNIIHDHPMmSGPPRQGAGGGDSqFYHHHPIGGGGGGFSL	protein LATERAL ORGAN BOUNDARIES [Cannabis sativa]	1731687756
NNLqSNSNMLqnQQHMKQQHE	mediator of RNA polymerase II transcription subunit 15a isoform X2 [Cannabis sativa]	1731683138
NNNINAAGSTAnPISNPN	probable WRKY transcription factor 31 [Cannabis sativa]	1731682079
NNNLTGAVPDFLSQm	putative leucine-rich repeat receptor-like serine/threonine-protein kinase At2g19230 [Cannabis sativa]	1731674417
NNNNSNSNNGYLLQSSSGSVQESHNISNPIPA	transcription factor TCP15-like [Cannabis sativa]	1731744419
NnnYGIIPPNPNNSSPTS	LOW QUALITY PROTEIN: protein SCARECROW-like [Cannabis sativa]	1731705635
nNSQHADIAHGLISI	putative pentatricopeptide repeat-containing protein At5g08310, mitochondrial [Cannabis sativa]	1731719812
NNSSNDIIIKSNSNNNMLGSSDqRRn	dof zinc finger protein DOF4.6 [Cannabis sativa]	1731701450
NNVCNTnKnVYAnSLEFRLLRQH	terpene synthase 10-like isoform X4 [Cannabis sativa]	1731706575
nNYNGGIPPELGGmISLQILDmS	LOW QUALITY PROTEIN: receptor protein kinase CLAVATA1-like [Cannabis sativa]	1731718820
NPANGLEFDFVTTQQQVYYSFLTTE	receptor-like serine/threonine-protein kinase SD1-8 [Cannabis sativa]	1731681874
nPCLVLTKIHLqKEGDES	uncharacterized protein LOC115719846 [Cannabis sativa]	1731715487
NPSSPGSTVNAGGSPGMSFTVPqLG	LOW QUALITY PROTEIN: protein unc-13 homolog [Cannabis sativa]	1731724211
NQINPQLqSKNVQSSVGPmQQNSmTSFQQNSmPA	mediator of RNA polymerase II transcription subunit 15a isoform X2 [Cannabis sativa]	1731683144
NQINPqLqSKNVqSSVGPMQQNSMTSFQQNSMPALSAVSTTQ	mediator of RNA polymerase II transcription subunit 15a isoform X2 [Cannabis sativa]	1731683144
NqKNSSRRSANYqPPLWQFD	terpene synthase 10 [Cannabis sativa]	1731704070
NqKYADEVNNMLVALEKAAGEGFCL	putative disease resistance protein RGA1 [Cannabis sativa]	1731727474
nQLLARIGDDAAAALKELESHYYS	mediator of RNA polymerase II transcription subunit 22b [Cannabis sativa]	1731680418
nQLPLMKnnNNmITPSMSSLEA	putative uncharacterized protein DDB_G0289263 [Cannabis sativa]	1731690932
NqLSPEVKHRPFTAmEDqI	transcription factor MYB44 [Cannabis sativa]	1731671902
NqMFHqAVPGINAPI	light-inducible protein CPRF2 isoform X2 [Cannabis sativa]	1731695226
NQTVDNLIRnQYLmSDGGNLHLENNNNNNNNNGE	uncharacterized protein At5g41620 [Cannabis sativa]	1731704939
NQVTRNLACEWAKDnIRVnTV	tropinone reductase homolog At5g06060 isoform X3 [Cannabis sativa]	1731738269
nRnVVVCDnGTGYVKCGFAGENFPTSVF	actin-related protein 2 [Cannabis sativa]	1731746206
NSAKSGASPWGSASGPNqGPPSIAMGqPQFPPQNPQDP	uncharacterized protein LOC115717296 [Cannabis sativa]	1731707773
NSDTMFKANnFAPn	cysteine-rich receptor-like protein kinase 10 isoform X2 [Cannabis sativa]	1731681477
NSGNNRQQLmSAAPSQPSISGYNNNHQPQqVHPHmPFRPRqQMF	SWI/SNF complex subunit SWI3C isoform X2 [Cannabis sativa]	1731669813
NSHNINIMPSqHHDNITKDVVADA	transcription factor MYB124 isoform X2 [Cannabis sativa]	1731742433
nSLVNmYAKCGSIDDASRSFSEIAERGIVSWSAmIGG	pentatricopeptide repeat-containing protein At5g04780, mitochondrial isoform X2 [Cannabis sativa]	1731718661
nSSSTSDISLKLSTGGnGEEMGHPEA	growth-regulating factor 3 [Cannabis sativa]	1731663177
NTAPPNQTmVWNNmImESYDNNAKTEDLRKRKQHG	uncharacterized protein LOC115696527 [Cannabis sativa]	1731735384
NVAAFAVSAYASSEGRHCK	oxysterol-binding protein-related protein 2A isoform X2 [Cannabis sativa]	1731705271
NVAISMqVLRQATNnFSEDnILGRGSFGVVYK	LOW QUALITY PROTEIN: receptor-like kinase TMK4 [Cannabis sativa]	1731722195
NVAMPPGPPQAPqPFYSqQVQ	pre-mRNA-processing protein 40A isoform X3 [Cannabis sativa]	1731676319
NVInGGSHAGnKLAMQEFmILSVGASSF	enolase-like [Cannabis sativa]	1731693896
NVIQNPGRLFTMT	uncharacterized protein LOC115719950 [Cannabis sativa]	1731715733
nVKNLLVQGGGTLDGY	LOW QUALITY PROTEIN: uncharacterized protein LOC115711463 [Cannabis sativa]	1731689850
NVKSPAAESSVNKGSnNESGDQHDGADAKEPSSSGNSFNQFI	actin-related protein 9 [Cannabis sativa]	1731723999
NWICNmYRSSMLTSSPIEGLSSENVINGIMGESTPSTSECGSTSKER	phosphoinositide phosphatase SAC3 isoform X1 [Cannabis sativa]	1731683579
NWmGDDRCLSNLVSLTITWCSNCTFLPSLGQ	putative disease resistance RPP13-like protein 1 [Cannabis sativa]	1731685804
PAATSNMPEPGVqTSNGRPqqAMETFAAPFYQTR	uncharacterized protein LOC115725706 isoform X2 [Cannabis sativa]	1731731802
PAVGVAVAPGGGDAAAAAPEEK	50S ribosomal protein L12-3, chloroplastic [Cannabis sativa]	1731744810
PAVPNDDIDKLADmFIANCH	uncharacterized protein LOC115701577 [Cannabis sativa]	1731746840
PDSGNPYVTVATSSTVVVVSEPQMSPSNDmNLYNSARVFGEASVYnI	receptor-like protein kinase THESEUS 1 [Cannabis sativa]	1731673803
PEqLLELDGqTRSVLATNNFn	uncharacterized protein LOC115709712 isoform X2 [Cannabis sativa]	1731686341
PESLRGTqPTAmLRLPCFCCSPGCRNnIDH	zinc finger protein WIP5 [Cannabis sativa]	1731710972
PETPPPPmPIKMTSLEIAQMVCGH	protein LOL2 [Cannabis sativa]	1731738480
PFFATANALINCRnGLmKLSFGnMTMEVN	uncharacterized protein LOC115720134 [Cannabis sativa]	1731716190
PFSSLEDACERLLPYHVVADYEAEEDDRILDSDTTGQLPSRSqqWDHNI	ras-interacting protein RIP3 [Cannabis sativa]	1731706812
PGINSMQPPENTIPSPTAnVnTTSFE	uncharacterized protein LOC115706412 [Cannabis sativa]	1731678829
PGKDmDIFLRPSVDELKELWNNGVPTRDSSTNSmF	uncharacterized protein LOC115695493 [Cannabis sativa]	1731733528
PGLLSEFmDmKGqKNKVINSKDmSSIGTTNSGS	cold-responsive protein kinase 1 [Cannabis sativa]	1731738936
PGLnIITEYVMGIILPGHPIAnVCFKTYGYm	oligopeptide transporter 4 isoform X2 [Cannabis sativa]	1731710777
PGMGGSYLNVLDLqqDFEKGTTFLYFNSFDNYFPTNFFVSS	G-type lectin S-receptor-like serine/threonine-protein kinase At1g61480 [Cannabis sativa]	1731681883
PGMLSSFPGVnTMGLGAVAPHVnPAFFGRGMTnNGmSMMG	cleavage and polyadenylation specificity factor subunit CG7185 [Cannabis sativa]	1731695604
PGnALLEFRGNAGSHDLPFSVET	D-glycerate 3-kinase, chloroplastic isoform X2 [Cannabis sativa]	1731675978
PGPESTPVAPSSPMRQPGDHYqqLSG	sucrose synthase 6 [Cannabis sativa]	1731696304
PGSGRAKNKnMSKHVHGE	uncharacterized protein LOC115718971 [Cannabis sativa]	1731712043
PGSWSSYLqVSNFqLLMPA	glucan endo-1,3-beta-glucosidase 4 [Cannabis sativa]	1731731544
PHTQqESIVNNDDIHKVSI	uncharacterized protein LOC115719280 [Cannabis sativa]	1731713096
PHVFAVGDAAYRAmINEGKSnSILVSGESGAGKT	myosin-17 [Cannabis sativa]	1731680336
PKGCqSRDGKTFSmFLKLSADSNNPDnSTI	ubiquitin carboxyl-terminal hydrolase 12-like [Cannabis sativa]	1731717770
PKGNNYHYLDNVKSGDFA	transmembrane emp24 domain-containing protein p24delta7 [Cannabis sativa]	1731745534
PKILTGAEnYSSWHRSmMV	uncharacterized protein LOC115717807 [Cannabis sativa]	1731667731
PKSATSNnACEPGVSTDVVGTFSNWLSSI	uncharacterized protein LOC115717532 [Cannabis sativa]	1731708271
PLCDIPGTVTTmHVVVqPPSQEKE	membrane-anchored ubiquitin-fold protein 1 [Cannabis sativa]	1731745709
PLGAANVYSAPDPIAQPSGAANVYS	uncharacterized protein LOC115719717 isoform X2 [Cannabis sativa]	1731714992
PLLIIGDLnGTLqDSECL	uncharacterized protein LOC115696507 [Cannabis sativa]	1731735354
PLMAKSAEGMVSGMnqAKAqG	bifunctional 3-dehydroquinate dehydratase/shikimate dehydrogenase, chloroplastic isoform X2 [Cannabis sativa]	1731719844
PLNAAYTAEEFEFYLSDSESKLLI	oxalate--CoA ligase [Cannabis sativa]	1731704555
PLNNQVHEDVWYWSKEATGFY	uncharacterized protein LOC115699889 [Cannabis sativa]	1731743270
PLSAAqGSSCSIYqLASVPPEAPDTRGVSNDVENICTF	uncharacterized protein LOC115698826 isoform X5 [Cannabis sativa]	1731669559
PLSSSTSNASSVVDnPSTALAHV	N-terminal kinase-like protein isoform X2 [Cannabis sativa]	1731712419
PMQTSHPKTMNnITTnTnNLTAAPATTTGENFVFFR	cytochrome P450 86B1 [Cannabis sativa]	1731682820
PMYGSLGnPTLGSASnPPPGPSmQSGIINSVNAANFTPA	leucine-rich repeat extensin-like protein 5 isoform X3 [Cannabis sativa]	1731687601
PNDPFPPEWGVAAYFGAECEKHGmLVRVSGDNIMMSPPF	gamma aminobutyrate transaminase 3, chloroplastic [Cannabis sativa]	1731742098
PNEDIPQSGEGIIGSnPTPDDI	uncharacterized protein LOC115718024 [Cannabis sativa]	1731709112
PNLSMFRGGDEEQCNALGDYKKPYNAYSNTYnPGWR	uncharacterized protein LOC115722290 [Cannabis sativa]	1731668322
PNnASPPnnSAYPPKPSKTTPPAQPP	extensin [Cannabis sativa]	1731727758
PNSAPRPRNSSDPmFDTQFQNRQESETTKSTSGFQS	auxilin-related protein 2 [Cannabis sativa]	1731695173
PPNICNMTnLQRLSDFV	putative disease resistance protein At3g14460 [Cannabis sativa]	1731730044
PPRRGYGGGGGGGGGDQnGSLLVRNIPLDC	serine/arginine-rich SC35-like splicing factor SCL30 [Cannabis sativa]	1731678403
PQFYnTGSRYTPDQYADLLI	GDSL esterase/lipase At5g45670 [Cannabis sativa]	1731737723
PQGSEQPQGGDANASSNnAEAAAESGEAPAAPA	heat shock 70 kDa protein 14 [Cannabis sativa]	1731675870
PqIAESPqGHSALPNGGDmVqRDLMKQPSTVEHDSA	protein NLP6 isoform X3 [Cannabis sativa]	1731704135
PQNGSLEMIDSQNnQRTKEARFLnMAAGANEDASH	CMP-sialic acid transporter 2 [Cannabis sativa]	1731714478
PQPSGSAHPENSNKQSTEAKDQVPTLTDQSQPSQSqPG	uncharacterized protein LOC115704623 [Cannabis sativa]	1731674464
PqRCEIDEPLMqTYqVSNLI	cinnamoyl-CoA reductase 1 [Cannabis sativa]	1731684557
PQRKPFLEDTLqqFMQSTQQIm	LOW QUALITY PROTEIN: uncharacterized protein LOC115717675 [Cannabis sativa]	1731708523
PQSNKAIVGVAPFGmGFGY	putative F-box protein At3g16210 isoform X2 [Cannabis sativa]	1731719760
PQTQTQNNLqPQQHQHQPP	VQ motif-containing protein 9 [Cannabis sativa]	1731668300
PQTWNLnDKDVENKEENKNES	uncharacterized protein LOC115697166 isoform X2 [Cannabis sativa]	1731736676
PRGNQFETFNNDSYKGnIELCGFP	receptor-like protein 7 isoform X2 [Cannabis sativa]	1731732123
PRNQKEDPANVTPDSSITAnS	protein DYAD [Cannabis sativa]	1731719530
PSANLANKSSGQGGGCLGAHRG	uncharacterized protein LOC115709798 isoform X1 [Cannabis sativa]	1731686593
PSDEFRSGGPHKQNLTSHVGPTTLAmFLSAHYAGqDLV	probable rhamnogalacturonate lyase B isoform X2 [Cannabis sativa]	1731686320
PSGGDSHVTTRIMGTYGYAAPEYIATG	probable serine/threonine-protein kinase PIX13 isoform X2 [Cannabis sativa]	1731671068
PSIHAPLVGSPPPYHHDQ	protein SSUH2 homolog [Cannabis sativa]	1731738109
PSLYIWnDmnEPSVFnGPEVTMPRDALHQGGVEHREVHNAYGYY	probable glucan 1,3-alpha-glucosidase [Cannabis sativa]	1731697700
PSnDGDILSMRGqLSSRMQKEGnLWHELWETS	rab3 GTPase-activating protein catalytic subunit [Cannabis sativa]	1731731367
PSNPAnSRPTDPGSIVMPPqVHnQ	mediator of RNA polymerase II transcription subunit 15a isoform X2 [Cannabis sativa]	1731683138
PSPGSGIRPSnIGCqPDVGQMYGATG	uncharacterized protein LOC115699059 [Cannabis sativa]	1731669601
PSPVANqqLqGNLPIEQTNNMQSSGFMGTQRNHLQSGGGLNP	uncharacterized protein LOC115704319 [Cannabis sativa]	1731673982
PSVnKYMnFLLQQHNDPQRAAAAAAALmMGEDFYKF	zinc finger CCCH domain-containing protein 55 [Cannabis sativa]	1731712947
PTDSYDVDKNSDHLLmmVAYVK	DExH-box ATP-dependent RNA helicase DExH7, chloroplastic isoform X2 [Cannabis sativa]	1731714205
PTLVIEDDHHNHHLHnDFSYGLQ	probable BOI-related E3 ubiquitin-protein ligase 2 [Cannabis sativa]	1731667348
PTmAAITTATIMEEqDK	seipin-1 [Cannabis sativa]	1731710014
PTPHGQQTAHMMTSSQmPPYYPqMPDVSqPQIPR	putative uncharacterized protein DDB_G0291608 [Cannabis sativa]	1731715371
PTRFTmDQLVNEFPSREFGAS	nitrate reductase [NADH] [Cannabis sativa]	1731666939
PTTTTTEPSTSTEAAPTGTEATPPTTETPTPQPDSGEPVTGD	uncharacterized protein LOC115714534 [Cannabis sativa]	1731696387
PTVLVEVImDQQLPDMLDFEN	uncharacterized protein LOC115703846 [Cannabis sativa]	1731673211
PVAAGAGDTNICGGIVqLYWDnIL	sister chromatid cohesion protein SCC2 isoform X3 [Cannabis sativa]	1731739724
PVGPLVnmEPSTKADESnCLTWLDKqPHGSVLFVSFGS	hydroquinone glucosyltransferase-like [Cannabis sativa]	1731676792
PVSGDMNNAVLNSVAnSGPSVGASSL	probable transcriptional regulator SLK2 isoform X1 [Cannabis sativa]	1731706166
PWMIVGDFNAmFGYqDRWGGRPIqSRDIADAQD	uncharacterized protein LOC115723846 [Cannabis sativa]	1731725598
PWNLEVDAVVNSTnEnLDEAHSSAGLHAAAGPGLGEECATLG	protein GDAP2 homolog isoform X2 [Cannabis sativa]	1731742090
PWRHASKQTSSPDMPSYIITCHNCGHGTDLRGCPqSPLSPEGDAQK	probable serine protease EDA2 [Cannabis sativa]	1731697273
PYGVFHHNMNINTPSTSFINqDGSSAFDFGELEqAIA	transcription factor TGA9 isoform X1 [Cannabis sativa]	1731710132
QCAYRSESMNFPNGVGSSRSDWqSSCAILASKVVSqEqPTDKAGGADH	arogenate dehydratase/prephenate dehydratase 6, chloroplastic [Cannabis sativa]	1731713482
QDGKNGGGGGGNKNVNGGGGGGGGNNLnGGKKGGGGLDGA	heavy metal-associated isoprenylated plant protein 33 [Cannabis sativa]	1731726314
qDITFAVnILSQFMSSPRTPHMQAAH	uncharacterized protein LOC115723750 [Cannabis sativa]	1731725447
QDPGKDTLYFCMGEPFNPKAAVAICAMQHVRKYNQNIRQLTACGTnnAF	uncharacterized protein LOC115724218 [Cannabis sativa]	1731726608
qDYQRHYLIInHIGSIRAEHDDFTIRFASAmn	protein PIR [Cannabis sativa]	1731712505
QEAEQVYSTmRTVnVKRTITEMMASESTMSGGVSnY	uncharacterized protein LOC115709503 [Cannabis sativa]	1731685839
qEHDVAIVGGGmVGLALACSLASM	ubiquinone biosynthesis monooxygenase COQ6, mitochondrial [Cannabis sativa]	1731704953
QEIFLESTSTIqPCFEDDNKIPQQQFHFC	LOW QUALITY PROTEIN: replication protein A 70 kDa DNA-binding subunit E-like [Cannabis sativa]	1731663228
QEInSAnEPSVRASNDSSDEGIKKICDV	probable ubiquitin-like-specific protease 2B [Cannabis sativa]	1731667421
QEKNnnINEENEDKNR	replication protein A 70 kDa DNA-binding subunit D-like isoform X1 [Cannabis sativa]	1731736464
QEPGSDNIEPEAQP	putative UDP-glucuronate:xylan alpha-glucuronosyltransferase 5 [Cannabis sativa]	1731715493
QEVVRQPEmLPVADDISSQISAqIFEFCD	myosin heavy chain kinase D isoform X2 [Cannabis sativa]	1731721665
QFEDVNRMnARnIATIFAPNmTHmLDPL	rho GTPase-activating protein 5 [Cannabis sativa]	1731713814
QFSFGNIKGNGVnQAGQEmAT	probable arabinosyltransferase ARAD1 [Cannabis sativa]	1731686874
QFYPSSNEYDTGVDDLQNPRHYIVWNmNINTHIYPEFVVSFKAPSFTQGYMV	LOW QUALITY PROTEIN: probable inactive poly [ADP-ribose] polymerase SRO1, partial [Cannabis sativa]	1731694643
QGAFGNmTQNAQNLQSSmATLqSNPQSHPNFGQQRQQ	mediator of RNA polymerase II transcription subunit 8 isoform X2 [Cannabis sativa]	1731724822
qGAPVLVNMGSASSLQDGDQNnMnLKHQS	DUF724 domain-containing protein 7-like [Cannabis sativa]	1731690199
QGCFNITTVFSHSQTVVVCGNC	40S ribosomal protein S27-2 [Cannabis sativa]	1731683684
QGHEYNQPSLPYNPNNqGLqPLPVEG	uncharacterized protein LOC115710945 [Cannabis sativa]	1731688887
qGKKGTNQDAMLVWEnF	probable protein phosphatase 2C 33 [Cannabis sativa]	1731712047
qGmFERERnLRHq	uncharacterized protein LOC115705886 [Cannabis sativa]	1731677400
QGNKLLHSRFRGDCLYICnLPGCVH	LOW QUALITY PROTEIN: phytochrome A-associated F-box protein-like [Cannabis sativa]	1731663996
QGqGqGGGGMRNSLFDFNqPFPGFGGFGGMGGHGSLFSS	myeloid leukemia factor 1 [Cannabis sativa]	1731705959
qGSPqVISMLGNSYPSAGGPLSqSHV	probable NOT transcription complex subunit VIP2 isoform X2 [Cannabis sativa]	1731712413
QGVVETSTSSSPmKKPDLGISmSNTAGGGN	AT-hook motif nuclear-localized protein 19 [Cannabis sativa]	1731711505
QHHKFSGSNSSRnnKGSRWnKENFKQSDDSE	chromosome transmission fidelity protein 18 homolog isoform X2 [Cannabis sativa]	1731726136
qHLGVSDSLTDGNEGqNSLKANVRETIEKAFWDGVmESMKGnESDF	uncharacterized protein LOC115716073 [Cannabis sativa]	1731704727
qHTSLLRLEGTGqVNNQMYLEG	NAC domain-containing protein 17 isoform X2 [Cannabis sativa]	1731666726
QHVAPGHLSGDRGAQASGERHAAHAGGLHPEQQSTESAAqqRAGDSARD	ubiquitin-like domain-containing protein CIP73 isoform X3 [Cannabis sativa]	1731728382
QIPSFNmAKNLTQInLSHnmVTG	receptor like protein 27 [Cannabis sativa]	1731736354
QIqqLDDSLAqSmQVSSSPQEWKSRGVELYHVHNYEMATICFEK	uncharacterized protein LOC115722878 [Cannabis sativa]	1731723489
qIVnYMAVDAQQLSDMmLQLH	ABC transporter C family member 4 [Cannabis sativa]	1731663962
QKDLQIEKKCqqDYYYGPEKIEQQGAYE	uncharacterized protein LOC115719114 [Cannabis sativa]	1731712497
qKIKKQPLECNNNNNNNSSGG	histone-lysine N-methyltransferase, H3 lysine-79 specific [Cannabis sativa]	1731722301
qKLQQRSNEFMG	protein SABRE isoform X2 [Cannabis sativa]	1731731361
qKYHVPLnADCPLCnAHAEAVQHAL	uncharacterized protein LOC115695031 [Cannabis sativa]	1731732757
QLERDAFPTRGKIAQFMELNDVYC	uncharacterized protein LOC115717538 [Cannabis sativa]	1731708281
QLFQGnDHYVWInETSGLYSWmPPP	uncharacterized protein LOC115694895 [Cannabis sativa]	1731732527
qLGASNDGGGGGGSGGNnLSGGGDGHL	transcription factor TCP14 [Cannabis sativa]	1731686529
qLGEAAHRLVSNSLqVKADYNGYGnH	5'-3' exoribonuclease 3 isoform X3 [Cannabis sativa]	1731736072
QLGETEGPPNnEQPEETEVPPKnPNDQPE	basic salivary proline-rich protein 2-like [Cannabis sativa]	1731688319
qLGLPSTQTMTQYFRPTVLPTSSSSSEYS	probable inactive serine/threonine-protein kinase scy2 [Cannabis sativa]	1731743881
QLGSmLMQPqqqQQQHQPSQHLGLGVSESNLGMLA	transcription factor TCP8 [Cannabis sativa]	1731713512
QLGSqAEGDVEGEGEEEKKENEPFAV	protein MLN51 homolog [Cannabis sativa]	1731675896
qLKAqHRLILSGTPIQNnVMD	TATA-binding protein-associated factor BTAF1 [Cannabis sativa]	1731735390
QLLKTTTSSLInDnGNNLLLLDDQNCCVDHDIMMS	myb-related protein 305 isoform X2 [Cannabis sativa]	1731691672
QLYPTITIPQRCEIDEPLmqTYqV	cinnamoyl-CoA reductase 1 [Cannabis sativa]	1731684557
QmIPNmSGTmSSSSILPRMQQFGLTANNPqRNHASQILSDQMFNM	mediator of RNA polymerase II transcription subunit 8 isoform X2 [Cannabis sativa]	1731724822
QmYLEGTDPINnLLYQDIAnQmN	NAC domain-containing protein 17 isoform X2 [Cannabis sativa]	1731666726
QnAGAEVAWTnKSQSnRHDGV	protein MODIFIER OF SNC1 1 isoform X2 [Cannabis sativa]	1731685654
qNASTNTmRVESSGLNQIQTDAnTDEQYD	uncharacterized protein LOC115712823 [Cannabis sativa]	1731692735
qNFNFELVPDqIIGMT	carotene epsilon-monooxygenase, chloroplastic isoform X2 [Cannabis sativa]	1731724522
qNGNNVGISEVEQHASnAAPA	heavy metal-associated isoprenylated plant protein 35 isoform X2 [Cannabis sativa]	1731717475
QNGSGTTLTDLDPSTADnFDnNYFNNLQNNRGLLQSD	peroxidase A2 [Cannabis sativa]	1731746194
qnKnILDMAYDLDSSEYEKKKGLP	uncharacterized protein LOC115695674 [Cannabis sativa]	1731668925
QNMGLPFGQFCMPNHLQNmnQFLPMQMQMQnLSQFVPQNTYGVMN	uncharacterized protein LOC115704319 [Cannabis sativa]	1731673982
QNNNIPNPLPSNPANSRPTDPGYFEDLSYI	mediator of RNA polymerase II transcription subunit 15a [Cannabis sativa]	1731683146
QNPETEVGVPSSTVSATQSNQVmASRNPLEDPSNPYYL	uncharacterized protein LOC115696756 [Cannabis sativa]	1731735770
QPFDPTIATTTDHHFnLFSDnH	scarecrow-like protein 15 [Cannabis sativa]	1731696073
QPGMHHFGSHQTQQQQHQQqQQQQQQLHMPQSSN	transcription factor VIP1 [Cannabis sativa]	1731666923
qPKMGPPNDDRSNLLRQSSSPAGFFSALASENSFDAm	transcription factor bHLH130 isoform X2 [Cannabis sativa]	1731691470
QPnSnPNNNNNNSIAKTPSTTFNSSS	ABC transporter G family member 17-like [Cannabis sativa]	1731689240
QPQPHqSPqqQQQQLQPANGGFYR	regulation of nuclear pre-mRNA domain-containing protein 2 [Cannabis sativa]	1731746751
qPRGSVLYVSFGSGGTLSSDQmNELAFGLEMSG	hydroquinone glucosyltransferase-like [Cannabis sativa]	1731731006
QPSnNNYEVEPIFLmHDL	putative disease resistance RPP13-like protein 1 isoform X1 [Cannabis sativa]	1731684515
QQLQMSMMNSLAGMGMGMGMTMDTMGRPnLPGInPILHPNPFMPMNAW	transcription factor UNE10 [Cannabis sativa]	1731706381
QQMnGGSTVEGIARKDEWHTPILAmTADVIHATYE	histidine kinase 4 [Cannabis sativa]	1731721574
QqPPFKKIATDGSMGGmAINSmQ	transcription initiation factor TFIID subunit 6 isoform X2 [Cannabis sativa]	1731727303
QQQQHHQLQQHnVGMLQPAYSn	LOB domain-containing protein 20 [Cannabis sativa]	1731725832
qQQQQQQTQPQKTQnPnAPKL	pentatricopeptide repeat-containing protein At3g49240, mitochondrial [Cannabis sativa]	1731706899
QQQWPADGGSGWNAPPqAGPYIARGYSqPHQS	5'-3' exoribonuclease 3 isoform X3 [Cannabis sativa]	1731736072
QQSVANMPLTPSSGmQSLSQGKQMQSTFSqP	regulation of nuclear pre-mRNA domain-containing protein 2 [Cannabis sativa]	1731746751
qRIGENASQILDPSHV	transcriptional corepressor LEUNIG isoform X4 [Cannabis sativa]	1731678177
qRIGEnASQILDPSHV	transcriptional corepressor LEUNIG isoform X4 [Cannabis sativa]	1731678177
QRNKGLnPGnHSVP	ETHYLENE INSENSITIVE 3-like 1 protein [Cannabis sativa]	1731677916
QRPnnSAFGFGTSQMGILPLnQLSPN	transcription factor RF2a [Cannabis sativa]	1731670337
QRTMGGGLERnCYDEENQVA	GDSL esterase/lipase At3g14820 [Cannabis sativa]	1731703897
QRVFQYAAHmQVP	aminodeoxychorismate synthase, chloroplastic [Cannabis sativa]	1731666234
QRYSSLETEFHHLAKERDSLCKm	kinesin-like protein KIN-7N [Cannabis sativa]	1731669031
QSHRNSDFVNLGDSNGDNNARNSLPN	uncharacterized protein LOC115720298 [Cannabis sativa]	1731716610
QSIGDnVKQVYSKLmEESDDnnDEVNPSPPHEAAS	uncharacterized protein LOC115697892 isoform X2 [Cannabis sativa]	1731738513
QTFNLDQVAFAAEGIKDAQqTMSA	vacuolar protein sorting-associated protein 60.2 [Cannabis sativa]	1731677963
QTIAKIAALCNDSGVEQAGnHFVAn	calcium-transporting ATPase 1, endoplasmic reticulum-type [Cannabis sativa]	1731714193
qTPMDLSKHKSDYAmEPYSQDSSTHSDTNNNSNRRRRASnFRnSL	potassium channel AKT1 [Cannabis sativa]	1731665394
QTSGHqMSQPmGQQPPQSQGSQMAGPPQT	DEAD-box ATP-dependent RNA helicase 40 [Cannabis sativa]	1731737630
QVGQWNMMNKKMVNGGTVSnWMCINFSRNVQEAVA	protein argonaute 1 [Cannabis sativa]	1731695348
QVLERGNLALKNCVDq	histone-lysine N-methyltransferase, H3 lysine-9 specific SUVH4 isoform X2 [Cannabis sativa]	1731744561
QVLQEKYEDATAALADMEKRVVMAESmLEATLqYqS	TBC1 domain family member 8B [Cannabis sativa]	1731674620
QVVDDNGRNV	11S globulin subunit beta [Cannabis sativa]	1731723280
QWLSDLEDISFDMDDVLDEWNSAILKCEIEKFDqGGKGIGEDGD	putative disease resistance protein RGA3 isoform X2 [Cannabis sativa]	1731730258
QYFPRPYGVHAAnnMSSSYLGGAVMTSLFNPTMGVFG	E3 ubiquitin-protein ligase RMA3 isoform X2 [Cannabis sativa]	1731678424
qYMTGSGnnKDCEEWFFDRIVRDRPLPIPGSGmQL	chloroplast stem-loop binding protein of 41 kDa a, chloroplastic [Cannabis sativa]	1731664433
RAGnGEFLmQLSIGTPPnAYSAIMDTG	aspartic proteinase nepenthesin-1 [Cannabis sativa]	1731697952
RALMPPPRWPTSDnNGKH	protein SPP41 isoform X3 [Cannabis sativa]	1731675283
RALSREEqTSSKSGNFSSNR	heterogeneous nuclear ribonucleoprotein 1 [Cannabis sativa]	1731695089
RAQSKDEGGNVVGHIAREVPEGnL	FACT complex subunit SPT16 [Cannabis sativa]	1731711220
RAVGGGMPYESCVCTFSRGAPCPPPGPPRCPGGGAAFImIn	uncharacterized protein LOC115723024 [Cannabis sativa]	1731723884
RCSASFGNCTNGDSEKEPLI	beta-glucosidase 46 [Cannabis sativa]	1731674468
RDEVLNGTESY	TMV resistance protein N [Cannabis sativa]	1731722661
RDGRISGqEAVPFFQG	LOW QUALITY PROTEIN: actin cytoskeleton-regulatory complex protein PAN1-like [Cannabis sativa]	1731671601
REDGIDGENDDHLnnQHPSVGRSnGELAVRDNNAPRTGRVASSEFmA	SNF1-related protein kinase regulatory subunit beta-1 [Cannabis sativa]	1731712312
REEAPnSHVVEqRVEWLYAFDVHCnSFFPmFVMA	protein unc-50 homolog [Cannabis sativa]	1731671936
REEELCnAPVPSSKDmIVDFSDDETQD	protein gamma response 1 isoform X2 [Cannabis sativa]	1731695846
REMIAPPNIVSKmLSVMTGNSSnMSDTLPG	AP-3 complex subunit mu [Cannabis sativa]	1731715153
RENPTVENGHAGNGEmRRnPTVEnGHADNEEMRESR	myosin-17 [Cannabis sativa]	1731680336
RETENGKLEVFFGPEQGALmVEARSEmA	omega-hydroxypalmitate O-feruloyl transferase [Cannabis sativa]	1731678122
RETIKQQYEmVKERTANANDFVnG	vacuolar-processing enzyme beta-isozyme-like [Cannabis sativa]	1731718132
RFKESCmDANIDTKALLCLDVAARWnST	zinc finger BED domain-containing protein RICESLEEPER 2-like [Cannabis sativa]	1731708712
RFWEDNSTFQIPDEVDTSKPKY	leucine--tRNA ligase, chloroplastic/mitochondrial [Cannabis sativa]	1731682045
RGGHLYPRnLmEGFAqALLDSnLTDMELLGYQ	uncharacterized protein LOC115716504 [Cannabis sativa]	1731705819
RGGLAGGqVKLEPqVnDHG	transcriptional corepressor SEUSS [Cannabis sativa]	1731666112
RGHGMEETVELGnKLKLEMKmW	uncharacterized protein LOC115707208 [Cannabis sativa]	1731680834
RGNDALNLDGNDCCKNNGDPTDGPSDLLnLDTVNVDTTM	uncharacterized protein LOC115725320 isoform X2 [Cannabis sativa]	1731730665
RGSAGnGLGGVSASLSTSSGNSGSLEHKP	transcription factor TCP7 [Cannabis sativa]	1731721503
RGSSFNHTDFYSmVnGGGGKNmLSNVS	probable auxin efflux carrier component 1c [Cannabis sativa]	1731742623
RGTSISSWHGLSqDRLSGqqGMNmEWQTTPPSP	KH domain-containing protein At3g08620 isoform X3 [Cannabis sativa]	1731713473
RICVRNMVqSFGVGSSSTTnL	branched-chain amino acid aminotransferase 1, mitochondrial isoform X2 [Cannabis sativa]	1731666838
RKGCSSSSNLINNNnSSAASVTTLnF	protein TIFY 10c [Cannabis sativa]	1731680612
RLAEPQGASVFEnTGSAASFQEDQnDInmKNLSPDNHIAK	DUF724 domain-containing protein 7-like [Cannabis sativa]	1731690199
RLASCFLDSLATLnYPAW	alpha-1,4 glucan phosphorylase L isozyme, chloroplastic/amyloplastic [Cannabis sativa]	1731744179
RMLESIGATMDDTnRTKHTTPSLSYHQPEKTYH	uncharacterized protein LOC115695506 [Cannabis sativa]	1731733546
RMLLYqFmSnGSLASIL	calcium/calmodulin-regulated receptor-like kinase 2 isoform X2 [Cannabis sativa]	1731742339
RnEGGGVGMRnnDPNLFSKKKDEVVGLGmEMYP	EPIDERMAL PATTERNING FACTOR-like protein 6 [Cannabis sativa]	1731670825
RnIRLGLSADGPSQPGnNIDV	uncharacterized protein LOC115723583 [Cannabis sativa]	1731725164
RnKFLVSFIYGFNKEED	uncharacterized protein LOC115723682 [Cannabis sativa]	1731668531
RNMDQLNFHKLLGCNCQSPGRRYSCVEqCSPEVVqTKDNAHGqN	abnormal spindle-like microcephaly-associated protein homolog isoform X4 [Cannabis sativa]	1731682248
RNSVTTDDERSDRVVE	protein IQ-DOMAIN 14 [Cannabis sativa]	1731707757
RnWSHIPSSFTGIPGSISVTMHPDTQGCGGANNTNGLSmVKPmGASTSS	protein TIFY 6B [Cannabis sativa]	1731689377
RPDIAFSVnKVCQFmHnPLQSH	uncharacterized protein LOC115695555 [Cannabis sativa]	1731733630
RPEEVDDIGGSKCNMGLDEEEKLALQ	ethylene-responsive transcription factor WIN1 [Cannabis sativa]	1731676094
RQALVDEMLGSTDENEPLqVmM	pumilio homolog 1 [Cannabis sativa]	1731680105
RQEALHmLqSALEGSGGSAASSAYTE	protein SWEETIE isoform X2 [Cannabis sativa]	1731746276
RqELAGAqHELQmLHG	protein FLX-like 2 [Cannabis sativa]	1731743034
RqFqMVGNNNPGQFSDTTLTKIFVGG	RNA-binding protein 24-B isoform X1 [Cannabis sativa]	1731676645
RQLQLQQQQQQQQQqqYQMQQQ	uncharacterized protein LOC115714601 isoform X2 [Cannabis sativa]	1731696535
RQSEVRDFSPRDVSPRPNVnSSSPVPATMTK	TOM1-like protein 6 [Cannabis sativa]	1731736489
RqSGWInPFLEGLCKYL	protein SPA1-RELATED 3 isoform X3 [Cannabis sativa]	1731678712
RRCYSMGSYQYVLDDSELQVALqHK	RING-H2 finger protein ATL47 isoform X3 [Cannabis sativa]	1731696298
RRDTFRYDVSVQmIEIYNEqV	kinesin-like protein KIN-14I isoform X3 [Cannabis sativa]	1731685594
RRGASYYNCKPGAqSNPYnRqCSSISRCRS	rapid alkalinization factor [Cannabis sativa]	1731717311
RRnLDSSTQKGSDSKRSASGGGGGGDGGDSQHGKSGSmT	pollen receptor-like kinase 3 isoform X2 [Cannabis sativa]	1731681939
RSCTTDnGLSLPnATmCSVKSTADVYNFIK	LOW QUALITY PROTEIN: kinesin-like protein KIN-14L [Cannabis sativa]	1731690428
RSLGqNPTEAELQDmINEVDADGnGTIDFPEFL	calmodulin-7 [Cannabis sativa]	1731712314
RSmVWSHNDNWmVSGDDGGAIKYWQNnMNNVKANKTAHKESVRD	flowering time control protein FY isoform X2 [Cannabis sativa]	1731668640
RSPPPPPPGSnTRSSPPPPPS	LOW QUALITY PROTEIN: formin-like protein 14 [Cannabis sativa]	1731735680
RSqPPQQPNQQDSnQPSQPnAKF	dnaJ homolog subfamily C member 16 [Cannabis sativa]	1731685670
RSTNYNNINNLnnnNNKNENIEGPPLETISSSTSAPDDSmIIRER	protein DETOXIFICATION 48 [Cannabis sativa]	1731666372
RSVDFDAmRHLMASLWqPG	uncharacterized protein LOC115695554 [Cannabis sativa]	1731733628
RTTCnmRnCTQPRPADHNSKSAAKPIQAPQ	ranBP2-type zinc finger protein At1g67325 isoform X3 [Cannabis sativa]	1731695984
RVAEGYGMTETSCVISSMDEGDSLSGHVGSP	long chain acyl-CoA synthetase 6, peroxisomal [Cannabis sativa]	1731722072
RVGGGEVSVPFLQEKDIP	protein DNA-DAMAGE INDUCIBLE 1 [Cannabis sativa]	1731732433
RWIEDAASNPTDQILmAKH	uncharacterized protein LOC115707730 [Cannabis sativa]	1731682093
RYnDTLVADGIDFETIDVHPGRTYRVRVHn	monocopper oxidase-like protein SKU5 [Cannabis sativa]	1731704623
SAENHECISKqKAEYDKLVLqEETKLMES	serine/threonine-protein kinase BLUS1 [Cannabis sativa]	1731696743
SAIYFGGVNEAnKRAILnLMnM	uncharacterized protein LOC115696446 [Cannabis sativa]	1731735248
SAmDNSDPTNLEKLEqYAKDLLHK	uncharacterized protein LOC115696747 [Cannabis sativa]	1731735754
SAPIqAETGTTSqTKIDVDLFGAQPTmSSSA	clathrin interactor EPSIN 1 [Cannabis sativa]	1731669163
SASAVAQNPSASTAAAnQGCNKRMRPYCTNCHKPGHLK	uncharacterized protein LOC115696663 [Cannabis sativa]	1731735618
SATGnPNVGPFANLAAANmGGKP	uncharacterized protein LOC115718011 [Cannabis sativa]	1731709092
SDEVIQDIYEATEFVPSnTPGPDAATDDQIYFCAIKLCInHISAmL	uncharacterized protein LOC115714144 isoform X3 [Cannabis sativa]	1731695340
SDNLEGAYCLRSRqNGVTRFNCADSLDRTnAA	probable phosphoinositide phosphatase SAC9 [Cannabis sativa]	1731682955
SDPSSSPPPSSSPVVVPSDPYVnNPAPAPEDD	polygalacturonase At1g48100 [Cannabis sativa]	1731724842
SDSPQSILEILGRALNDmAmQNIIEEESLNnF	benzoate carboxyl methyltransferase [Cannabis sativa]	1731731754
SEqGNTEALIERmRMVASSSSSGPL	uncharacterized protein LOC115716979 [Cannabis sativa]	1731706985
SERGHGSQSSHmAHGLNFTQSNLMPEFGRVPSQNqQP	uncharacterized protein LOC115709738 [Cannabis sativa]	1731686410
SFNDGETPPIYmVGPAVnFKGQPHS	UDP-glycosyltransferase 71K1-like [Cannabis sativa]	1731709580
SFNLRNESFFRDSASEFEWQERSNGnYRSKTFGGSSDSE	uncharacterized protein LOC115714758 [Cannabis sativa]	1731696947
SFNSqLAHSTHLqSqIDAANRELFDSEREI	uncharacterized protein LOC115716760 [Cannabis sativa]	1731706464
SGDLYTWGDGARDFGILGHGNETSHWIPK	PH, RCC1 and FYVE domains-containing protein 1 isoform X2 [Cannabis sativa]	1731684936
SGFGISGVGGGVGLAGGVGGGGGVGLGSSHTF	AAC-rich mRNA clone AAC11 protein [Cannabis sativa]	1731692652
SGLSNLqVLmLSnnQFSSIPDDFFAGMSSLQSVEID	LOW QUALITY PROTEIN: receptor protein kinase TMK1-like [Cannabis sativa]	1731725542
SGmPAVqGLPAqAMMNGGYYQGQGMGPGYGPGPGPINPYnQQQQLQQLQ	heavy metal-associated isoprenylated plant protein 34 [Cannabis sativa]	1731711820
SGNPGIPGGFFGPGPAFNIPGFGnGFGn	glycine-rich cell wall structural protein 2 [Cannabis sativa]	1731679930
SGPGVnPLTTSPMPTmqTPYPTGmAA	RNA-binding protein 24-B [Cannabis sativa]	1731666568
SGPPGFNIqSSqMVDTSSRNTNKANPATGSS	bromodomain-containing protein DDB_G0270170 [Cannabis sativa]	1731671616
SGPPVSNADSPISVLqEIGMKC	RNA polymerase II C-terminal domain phosphatase-like 1 [Cannabis sativa]	1731737356
SGSGTVNTETGSSAKQPLRNDVSILNSWqKDTTNK	LOW QUALITY PROTEIN: uncharacterized protein LOC115706064 [Cannabis sativa]	1731677889
SGTFGGNKPnYNPFNKGEERKI	mannose/glucose-specific lectin isoform X4 [Cannabis sativa]	1731713356
SGVISEKmSKVRGVSEGKTMESEKCGn	KIN14B-interacting protein At4g14310 [Cannabis sativa]	1731713299
SGVTVNDISKSnnFVSnDKSSCNLLYRDSNASSVGYGSS	transcription factor PIF3 [Cannabis sativa]	1731714549
SGYKHSmKEVLEAPnVMnMIKDTKAAqEVRALEEFFSM	protein PELOTA 1 [Cannabis sativa]	1731718913
SGYLNNERFDLAqQLFEKmPRRD	pentatricopeptide repeat-containing protein At4g02750 [Cannabis sativa]	1731712146
SHAGLVEEGLSYFHFmEKKYG	putative pentatricopeptide repeat-containing protein At1g68930 [Cannabis sativa]	1731688968
SHCSWPGITCTSnSVTALYLYDAnITTPVPS	receptor-like protein kinase 5 [Cannabis sativa]	1731677945
SHDQTnnNNKLDNINNHV	cationic amino acid transporter 6, chloroplastic [Cannabis sativa]	1731704509
SHGIDmmTHAAHGNTGHAHGnTGHAHGQSH	protein catecholamines up [Cannabis sativa]	1731707068
SHHHHHHPHNANSYGSNRLRAGGHVTGGGGGGGGmVV	uncharacterized protein LOC115715032 isoform X2 [Cannabis sativa]	1731697568
SHLSSSNSVNNLDIVKCSDHMCPVRVHWHVKTnYmDH	COBRA-like protein 1 isoform X3 [Cannabis sativa]	1731664610
SHNTYHGKVLGKnCqTQGKDMIELEVVGTSTGWEK	protein FRIGIDA-ESSENTIAL 1 isoform X3 [Cannabis sativa]	1731738837
SHNVIMRQSHDLSFGANQSLGLGHNQHVGGVTHDQnLDLAHSHHDnE	uncharacterized protein LOC115714348 [Cannabis sativa]	1731695918
SHQNGIMPPqIMAqQQQQQQQQRMHHSVQP	protein PAT1 homolog [Cannabis sativa]	1731684021
SHVCGLNSTGFLVCSGnnSSGQLNAP	putative serine/threonine-protein kinase-like protein CCR3 [Cannabis sativa]	1731681825
SIDLMRQETGNNFTLSHFTHDFmASNNFPGLRGC	sister chromatid cohesion 1 protein 4 isoform X2 [Cannabis sativa]	1731739858
SIRNNRGLVSSnQGSTSPGGFPIGGRPGAGGmmPGm	eukaryotic translation initiation factor [Cannabis sativa]	1731731220
SKPVTEEEVRVAVLqmHPDKSPGPD	uncharacterized protein LOC115704112 [Cannabis sativa]	1731673645
SKSGxISYAENVFqETTMKnSVTYTTMILGYGQHGmGEKALSLFYSMQGSGIKPD	LOW QUALITY PROTEIN: pentatricopeptide repeat-containing protein At3g22150, chloroplastic-like [Cannabis sativa]	1731665910
SLCTQAmVAPGMDPIGGAVGPVSPMMWPLMNDVECPPSIW	ethylene-responsive transcription factor ABI4 [Cannabis sativa]	1731673113
SLDLSnNEFTGSLPSSIGEmNSLNFLSLSNNK	probably inactive leucine-rich repeat receptor-like protein kinase At3g28040 [Cannabis sativa]	1731721369
SLEQSEAGAGGQRKRRAGPEEDLSSPQSNNnNSNSNNGYLLQSSSGSVQ	transcription factor TCP15-like [Cannabis sativa]	1731744419
SLGISNSTILEHVqTFTNLMWPSTGNENFCETmIDYATR	2-oxoglutarate-dependent dioxygenase AOP2 [Cannabis sativa]	1731676058
SLnLDEYMAMSSGGGGGGGSSGGGnRWPRqETLALLRIRSEmDTVFRD	trihelix transcription factor GTL1 isoform X2 [Cannabis sativa]	1731705181
SLSSSATSSSSnGSTSSSVFASLFASSTTSASLqATTQSH	zinc finger protein ENHYDROUS [Cannabis sativa]	1731696077
SLTADPEnAWAVPAYGGVAILIEAC	uncharacterized protein LOC115699351 [Cannabis sativa]	1731741927
SLVKAWKNTQCmnGLDWTKIKCFASTGETSNVDDDLW	probable acyl-activating enzyme 18, peroxisomal [Cannabis sativa]	1731722145
SLWSSTPPPDEDRFNRYSSKPTTTTTTDDDDDVVSTTTTSTAGASASDPP	LOW QUALITY PROTEIN: TBC1 domain family member 13-like [Cannabis sativa]	1731722285
SMNHLTGNIPSMIGDCEKLETLDLSmNnLSGPIPqSmSS	receptor-like protein EIX2 [Cannabis sativa]	1731739738
SnLDLGEVNNWMQPIFQLPQLTNVNLSSCSLQD	receptor-like protein EIX1 [Cannabis sativa]	1731673351
SNLHEVFTSQIFIATCRGYWDRMGq	uncharacterized protein LOC115699041 isoform X2 [Cannabis sativa]	1731740915
SNnIInLCnWTNVVCDGSTGEISQIDLSNmELNGTLDQFNF	LOW QUALITY PROTEIN: probable leucine-rich repeat receptor-like protein kinase At1g35710 [Cannabis sativa]	1731694703
SnNQIIQLRDEARDWFSWETGLFEVVFNYFQG	uncharacterized protein LOC115704494 [Cannabis sativa]	1731674255
SNPEDRPTMHRVVQHLESEVmTPCPSDF	LRR receptor-like serine/threonine-protein kinase FEI 2 [Cannabis sativa]	1731702898
SNTNSSNKGGRSSDELqHIFLPL	U-box domain-containing protein 51 [Cannabis sativa]	1731674305
SnVDFGWGGPVTVLPLSTHLLGGLEPCY	spermidine coumaroyl-CoA acyltransferase [Cannabis sativa]	1731697127
SPDEHPFFPnDLPnPLLPPmQY	chorismate mutase 1, chloroplastic isoform X2 [Cannabis sativa]	1731744961
SPDqLQFPGMESSESVSRNSHSSGSnCVDPLRPKDS	glycosyltransferase-like At2g41451 [Cannabis sativa]	1731686259
SPESFSRLCRGFGEHPFPAQP	ethylene-responsive transcription factor ABR1 [Cannabis sativa]	1731691367
SPGPGWCAPVGATDNLVIRFSDNDSG	uncharacterized protein LOC115705912 isoform X4 [Cannabis sativa]	1731677487
SPNTDGIHLQnSRDVTIYGSnLACGDDCVSIQTGCSNVYIHN	polygalacturonase At1g48100 [Cannabis sativa]	1731739980
SPPELANEASGIFIWCLTQTAD	uncharacterized protein LOC115712030 [Cannabis sativa]	1731690852
SPPQSVGGGNEKDSSSDQKGGELELSPPLEEQGEEEGDqK	probable WRKY transcription factor 2 [Cannabis sativa]	1731729781
SPSnPSQAVmTGnIKEGLDEGLLSTYPKLKYS	putative RING-H2 finger protein ATL71 [Cannabis sativa]	1731673878
SqAFTWAAEKLETNGIGLPTSPSSSAVq	uncharacterized protein LOC115708047 [Cannabis sativa]	1731682951
SqHSVFEAPSVGVEKDYVnSSTTTSTqDGLGVGVGVGVGGSSMEFKTPACD	LOW QUALITY PROTEIN: uncharacterized protein LOC115711117 [Cannabis sativa]	1731689160
SQNTLNHSSqLACTDqqFIGLESGIM	WD repeat-containing protein 62 isoform X3 [Cannabis sativa]	1731734900
SQTNNGHLGRnNTHFLDPGSNQHPIG	rab9 effector protein with kelch motifs isoform X2 [Cannabis sativa]	1731714835
SRPVLVPAGNNnnnTAAARPA	uncharacterized protein LOC115707925 [Cannabis sativa]	1731682591
SRVEWLQSGDRNTKFFH	uncharacterized protein LOC115700339 [Cannabis sativa]	1731744023
SSGYGnYRHQADVCHAYQLLIKGGLKEENIVVFmYD	vacuolar-processing enzyme [Cannabis sativa]	1731705287
SSmIRSALMTTASEYNnMGKPLTnnSNSIASPHETGVG	CO(2)-response secreted protease [Cannabis sativa]	1731677556
SSmKHGGPVVCLCYGGnRLFS	zinc finger CCCH domain-containing protein 48 [Cannabis sativa]	1731746749
SSNGFTSGRIEMqAnSVVGSqSVVLPGSV	uncharacterized protein LOC115718462 [Cannabis sativa]	1731709868
SSPSDSDVnVSNFQAPAPKEmTSEEDS	protein RDM1 [Cannabis sativa]	1731726122
SSQDRHLHQSPNmSSAQPSVSSYSAGQGP	cysteine-rich and transmembrane domain-containing protein WIH1-like [Cannabis sativa]	1731745083
SSqSGEPTSGVGKVFLEYADTTGCANARnVLn	splicing factor U2af large subunit B isoform X4 [Cannabis sativa]	1731737434
SSSERTEmCAKHTKFHELSGSEVIRGPCEELELDCNKNDSHDVNI	uncharacterized protein LOC115717992 [Cannabis sativa]	1731709064
SSVYEKEYPDLnKEDIYAICQSCLDSLVSLFK	BTB/POZ domain-containing protein At2g13690 [Cannabis sativa]	1731693388
STQFRPmGSLQIPQmqTQNmGVPRAP	uncharacterized protein LOC115712481 isoform X2 [Cannabis sativa]	1731691875
STTSASDINNIRLLmHLInSVLMSC	enhancer of mRNA-decapping protein 4-like [Cannabis sativa]	1731665162
STYSTISMATnSLKnDPnLSMmKLSLTSTSNDIEVYNSDHHCIPK	LOW QUALITY PROTEIN: uncharacterized protein LOC115714599 [Cannabis sativa]	1731696529
SVAPqSAGLGNGNLHnVFVYGSLMAD	AIG2-like protein D [Cannabis sativa]	1731670009
SVAqQVDGDNPNLYFHQnDVILC	4-coumarate--CoA ligase 1 [Cannabis sativa]	1731729397
SVAVLGDYASVDGPL	protein LAZ1 [Cannabis sativa]	1731664225
SVDDLVAVGAPTCnSGCAGAPSSALGLLLqS	AP2-like ethylene-responsive transcription factor At1g16060 [Cannabis sativa]	1731746619
SVGFnTDQLPHTSRTSENF	DNA replication licensing factor MCM2 [Cannabis sativa]	1731705580
SVGqGLGVSPnPRADGGGGGSGmKLSY	adenine nucleotide transporter BT1, chloroplastic/mitochondrial-like [Cannabis sativa]	1731743378
SVISHGEFCNPSYPVALENqGMSSnSqLVQYPSDSSFV	transcription factor bHLH74 [Cannabis sativa]	1731666875
SVLmGMASGLETICGqAYGAKqYK	protein DETOXIFICATION 12 isoform X1 [Cannabis sativa]	1731696855
SVLPDSSTmSFSKNNGnFDSPTIS	protein HGV2 [Cannabis sativa]	1731692928
SVMECELPELQVCYKESGFSSVKDICIDEGVPS	uncharacterized protein LOC115701198 [Cannabis sativa]	1731745934
SVNLImnLTNGAETFPNKVY	cinnamoyl-CoA reductase 1 [Cannabis sativa]	1731684557
SVPLSNFGNYSCKNTSEGPTIILKCDG	uncharacterized protein LOC115719946 [Cannabis sativa]	1731715722
SVPRRAAEDCFPPLDYnQQR	auxin response factor 3 [Cannabis sativa]	1731737244
SVSLPDWKVHnGnGDTSCPPKEF	lysine-specific demethylase JMJ25 isoform X2 [Cannabis sativa]	1731681972
SVSmVWSSVNGIGANWGTQASH	glucan endo-1,3-beta-glucosidase 6 [Cannabis sativa]	1731694820
SVSPICSKVmNQVGKETSRFVD	serine carboxypeptidase-like 45 [Cannabis sativa]	1731698174
SVVqqMIRMYDFDRNGTMSFDEFVA	sorcin isoform X2 [Cannabis sativa]	1731746370
SWGSNPKLYGGGVVqSNIFNHNIGNFNNNNNNInGSHC	nitrate regulatory gene2 protein [Cannabis sativa]	1731671185
SWPVAPNnGIMPFSHPnHYmYA	uncharacterized protein LOC115701375 [Cannabis sativa]	1731746373
SYDEASRAWLqIAAMPPALSH	F-box only protein 13 [Cannabis sativa]	1731665374
SYENQPHIQnTVTHTWKmEFVGFYDYWnDYQGKATTQAFIMRD	uncharacterized protein LOC115712018 [Cannabis sativa]	1731690828
SYqqqVSDSMESIEKDYVLVNPHFASSESISYFLETSQLSNSKTGV	serine/threonine-protein kinase ATG1a-like [Cannabis sativa]	1731678906
SYYKGLTNSLQKNFNGTGLVSSmQqCNDFFFLGTKqISMGRVGDDF	stachyose synthase [Cannabis sativa]	1731664527
TADqPRGRYSM	laccase-6 [Cannabis sativa]	1731678205
TAGSRWGVVMSRNAGYSDqVVELDFL	casein kinase 1-like protein HD16 [Cannabis sativa]	1731733938
TAIPTYQSDESHMNQKLESSEGASPVLPCSSLHSRPC	uncharacterized protein LOC115708237 [Cannabis sativa]	1731683403
TAnTVFGSnPPInPDILSAGLSPGYS	germin-like protein subfamily 1 member 18 [Cannabis sativa]	1731716640
TAqPMVWAqVNqHWLHVASKLEGmELKQCVNSTLCL	bark storage protein A isoform X2 [Cannabis sativa]	1731672809
TCGGSGLDYCPRCLGTGEYRYVmGFQFmKRDVSHTQDRnKRRSV	uncharacterized protein LOC115696931 isoform X2 [Cannabis sativa]	1731736137
TCSSAWWSIIIGLIIATTSFWLCWFWYnnINNNNNNKQ	3-epi-6-deoxocathasterone 23-monooxygenase CYP90C1 [Cannabis sativa]	1731697167
TDVVMELISKnSEFAQTMDERGNmILHW	uncharacterized protein LOC115704574 [Cannabis sativa]	1731674381
TEmmNALNYIATPIVSDSQmLQ	uncharacterized protein LOC115719026 isoform X4 [Cannabis sativa]	1731712247
TFHYWFAFPALLLDPPATLVDLRPALqYFSTEEAESVSEACnAWRnSS	ubiquitin-like modifier-activating enzyme atg7 isoform X2 [Cannabis sativa]	1731737362
TFTWLLmnHLGLGTqFVEqEHHA	uncharacterized protein LOC115708725 [Cannabis sativa]	1731684065
THDDYNCHISPKqTIAESGSPNDSIFGNKKPDQFNGCCLPIKANMSV	uncharacterized protein LOC115722687 isoform X3 [Cannabis sativa]	1731722963
THITKDmKNVDESGKqCELKYGSYCI	probable galacturonosyltransferase 7 [Cannabis sativa]	1731705633
THnNLLPSAKLAPLQESNNYEELEDmEIV	uncharacterized protein LOC115696675 [Cannabis sativa]	1731669039
TIKqqYEmVKERTANANDFVnGGSHVME	vacuolar-processing enzyme beta-isozyme-like [Cannabis sativa]	1731718132
TIKVYEnKSADIIQGQmDT	DNA excision repair protein ERCC-1 [Cannabis sativa]	1731718003
TKHAYDnFEHKRTTqL	protein NUCLEAR FUSION DEFECTIVE 4 [Cannabis sativa]	1731707248
TKKNGVVEmDGCDRGSDDDEWLARVLS	uncharacterized protein LOC115702426 [Cannabis sativa]	1731670756
TKLSGGGDWHMAYICMYKAR	ubiquitin carboxyl-terminal hydrolase 6 [Cannabis sativa]	1731681866
TKQSMYCQLLCGLLERDH	indole-3-acetic acid-amido synthetase GH3.17 [Cannabis sativa]	1731691209
TLGVYqDMTAPLSHYFIYTGHNS	phosphoinositide phospholipase C 2 [Cannabis sativa]	1731736040
TLIPSHVCAEGLINCCDHnEIRATLVSAIE	uncharacterized protein LOC115718050 [Cannabis sativa]	1731667777
TLKACAGLnGMKLGGKVLTVVQALHAGASmEnTEnSS	uncharacterized protein LOC115722171 [Cannabis sativa]	1731721704
TLNAAKQTGGWKTSGSHKNIKFDSSD	syntaxin-71 [Cannabis sativa]	1731710192
TLPGAPGPSmVNNSGNNRqqLMSAAPSQPSISGYn	SWI/SNF complex subunit SWI3C isoform X2 [Cannabis sativa]	1731669813
TLQHAMKMTRTWDSTmSmIPKGGDTIWGAHNWSPE	phospholipid:diacylglycerol acyltransferase 1 [Cannabis sativa]	1731680386
TMISSSWGAPAAFTKGFnLqDVSDGLYGRHL	selenium-binding protein 2 [Cannabis sativa]	1731722271
TmSKLDCLPPGqInALGCREMIRAATITSYG	uncharacterized protein LOC115720074 [Cannabis sativa]	1731716044
TMTSKVAFYSLLIYFATSMGTISMAAHQVmIQTFCmCTVWGEPLSQTAQSFmPEL	protein DETOXIFICATION 46, chloroplastic [Cannabis sativa]	1731708240
TNWIHVIENLDH	CCR4-NOT transcription complex subunit 1 [Cannabis sativa]	1731704649
TPADKNNNAPNLEnVLDDLnSFD	GTPase LSG1-2 [Cannabis sativa]	1731712519
TPNNDNHNAqLLCTNPVKADHQS	WRKY transcription factor 71 [Cannabis sativa]	1731745527
TPNNLPDVNSSTPnnPPESSKKTFqGDSVMSF	protein SAWADEE HOMEODOMAIN HOMOLOG 1 [Cannabis sativa]	1731691022
TPSTKACQNPSQYVNWDGVHLTEAmYKVVSDMFLKGSLMn	GDSL esterase/lipase At3g48460-like [Cannabis sativa]	1731688026
TQGNQqGSGYLDELqEqENLLIHCIEKLEN	regulation of nuclear pre-mRNA domain-containing protein 2 [Cannabis sativa]	1731746751
TqIFEGHSHYVmQVAFNPNDSNIFTSASLDGTImTW	coatomer subunit beta'-1 [Cannabis sativa]	1731676056
TQQFPQMMQTqqMQQTLQMMQTPQMQQTLCMPNILHQQIR	nuclear transcription factor Y subunit beta [Cannabis sativa]	1731683106
TRDnSYIAARDAVGITPLYMGWGL	asparagine synthetase [glutamine-hydrolyzing] 3 [Cannabis sativa]	1731692291
TRmVAPGGEALGGVIGAFRHmIqTEGFFSLYKG	probable mitochondrial adenine nucleotide transporter BTL3 [Cannabis sativa]	1731695626
TRNDQSLLGTTTTITmYPQNSSTSTNHqELPLSPP	protein indeterminate-domain 7 isoform X1 [Cannabis sativa]	1731665275
TSGGLSMDKnSMEKLREASAAEAEAASAVWqALqSSPVAPEETSVS	serine/threonine-protein phosphatase BSL1 isoform X2 [Cannabis sativa]	1731663806
TSGHGALKENYFLDDGAYMVVKII	uncharacterized protein LOC115714180 [Cannabis sativa]	1731695426
TSPSPSPSPSASASASSSSDDITCKDAITKLMSC	non-specific lipid-transfer protein AP10 [Cannabis sativa]	1731681311
TSSFSSKSHFnQPIISPSSPSPIVnPIL	uncharacterized protein LOC115698114 [Cannabis sativa]	1731738959
TSSSAAPPMNWRSARESGVPAPNYNESNYGQLLMPA	RING-H2 finger protein ATL52 isoform X2 [Cannabis sativa]	1731745620
TSSSSSSDASTSHNLKSVGSVTPTSVLPDQWSDYST	probable calcium-binding protein CML36 [Cannabis sativa]	1731686384
TSTTDNEHNDRVnYTYnGETSLqTRQLLPTRTEYA	uncharacterized protein LOC115696595 [Cannabis sativa]	1731735494
TTIATSKMATDGSSSGSPqVTqSSSSRmSEDGSSPTQVSSRDVV	uncharacterized protein LOC115705903 [Cannabis sativa]	1731677457
TTTPASPPAMDREQqqQQQQQQLDEQSQAGGGSPPQSSAQQPVSQQT	serine/threonine-protein phosphatase BSL3 [Cannabis sativa]	1731718946
TTTPASSYTNGGRGGGGGVGNNAEEFNFEEYRENSGLLDA	transcription factor MYB101 [Cannabis sativa]	1731740881
TVGDGGNKGGLAERFLDPqPnYSAFREASYGHSTLEImn	bifunctional purple acid phosphatase 26 isoform X5 [Cannabis sativa]	1731730341
TVnGTTYAGLRGRTTGAPqnH	probable aldehyde dehydrogenase [Cannabis sativa]	1731694059
TVNMGKAMGSGSGMGRVGAGALRPLANPMVGSGMGmGmGGGPGPGQGm	clathrin interactor EPSIN 2 isoform X2 [Cannabis sativa]	1731723303
TVRSAYAILQQQNInMEQSTFSGAW	uncharacterized protein LOC115719776 [Cannabis sativa]	1731715313
TVVVGGNGNSQTVqVFWDVHDWLFGSPGNGH	uncharacterized protein LOC115698805 [Cannabis sativa]	1731740382
TWFNSYGLLnRIYYEELGVIPAKSAPSTENP	uncharacterized protein LOC115695035 [Cannabis sativa]	1731732765
TYGqSLPnILLSLQMGISTVDSSISGLGGCPYA	hydroxymethylglutaryl-CoA lyase, mitochondrial-like [Cannabis sativa]	1731738194
TYGqSLPnILLSLqMGISTVDSSISGLGGCPYA	hydroxymethylglutaryl-CoA lyase, mitochondrial-like [Cannabis sativa]	1731738194
TYTMLGDIENLEVKPSPHRGmTP	kinesin-like protein KIN-12D isoform X2 [Cannabis sativa]	1731672416
VAGYANCGDmEAAKELYDEMEEKnLITWVAMVAGYGKCGnVMEARR	putative pentatricopeptide repeat-containing protein At5g37570 [Cannabis sativa]	1731720827
VAIQRAEISCVNNNPYSNSYNPAWKHHPNFSWGGQGESSSGAQGqGKqS	uncharacterized protein LOC115723726 [Cannabis sativa]	1731725407
VALRVmGEmALFHNCQMDGYQDTLYVLSGRqFYSq	pectinesterase [Cannabis sativa]	1731663599
VAPHTqqESIVNnDDIHKVSI	uncharacterized protein LOC115719280 [Cannabis sativa]	1731713096
VAPnVLnSSISnDWLGGRH	actin cytoskeleton-regulatory complex protein PAN1 isoform X3 [Cannabis sativa]	1731734043
VAPSDDEGHGTHTASTAAGNFVKGAnVFGnAnGTAAGmAP	subtilisin-like protease SBT1.7 [Cannabis sativa]	1731704472
VARqCPKANILGERGGGGGGGGGGGGGGRSSGYRDIVCRnCqQ	zinc finger protein GIS2 [Cannabis sativa]	1731730685
VASFAYEDSEILqIAAAVEY	copper-transporting ATPase PAA2, chloroplastic [Cannabis sativa]	1731665078
VATPKKSSGYqqQQYNSQALVLAGGHGSnGVVSQSPQSDSES	polyadenylate-binding protein RBP47B isoform X2 [Cannabis sativa]	1731671737
VAVLDISATTTGEGESnGqnIPSAESKGFHFDT	trigger factor-like protein TIG, Chloroplastic [Cannabis sativa]	1731731054
VDATHnnLPGAAAPGAGGGPQ	mitogen-activated protein kinase 3 [Cannabis sativa]	1731714782
VDGVLFEqEGHFGmGCVAQNHHGAmVEAFnKGKIGCVQ	uncharacterized protein LOC115700256 [Cannabis sativa]	1731743883
VDKSRQSLATIATIEQRYSENmLnnnAANSSGNVETNGRNLMMPAF	uncharacterized protein LOC115712214 isoform X3 [Cannabis sativa]	1731691284
VDPLMMESSPTEDIIRCmHIGLLCVqEDPnD	cysteine-rich receptor-like protein kinase 10 isoform X2 [Cannabis sativa]	1731681510
VDPnGILnGLEImKmSNSKGSLSNSDFSPSGS	receptor-like protein kinase HERK 1 [Cannabis sativa]	1731711905
VEADQPGNQLDDYVSKLnA	kinesin-like protein KIN-13B isoform X2 [Cannabis sativa]	1731682420
VEDASQLMDQmImEGLVPDKFTYNSLLTYFCRNGD	pentatricopeptide repeat-containing protein At3g53700, chloroplastic [Cannabis sativa]	1731686215
VEDASqLMDQmImEGLVPDKFTYNSLLTYFCRNGD	pentatricopeptide repeat-containing protein At3g53700, chloroplastic [Cannabis sativa]	1731686215
VEFYRnLGFEPDPEGIKGMF	histone acetyltransferase TAP1 [Cannabis sativa]	1731704987
VETVLSEmNSSGIEPTVVTY	protein LOW PHOTOSYNTHETIC EFFICIENCY 1, chloroplastic [Cannabis sativa]	1731744788
VETYRAAmmEFEINmSEMPLGKLS	poly [ADP-ribose] polymerase 1 [Cannabis sativa]	1731695471
VEWQPPSASqDGGAYCqPqSILSASMDKTMMIWQPER	elongator complex protein 2 isoform X2 [Cannabis sativa]	1731694811
VFEVLETSKLGSCSHPSQKSmAnSnLTDAEmAFIRQKFMDAK	uncharacterized protein LOC115701980 isoform X4 [Cannabis sativa]	1731662675
VFqKMEKGqAADVLDPTILnADSKQM	leucine-rich repeat receptor protein kinase EMS1 [Cannabis sativa]	1731707964
VGAQARNKDSQNESMPSGNGAVPLIGEqVVmHVDGSETTSNEmqIGQVE	uncharacterized protein LOC115706989 isoform X4 [Cannabis sativa]	1731680223
VGGAHNDANPIALADDRAqAIREYAAP	uncharacterized protein LOC115695219 [Cannabis sativa]	1731733072
VGLTVDGELFVACNECGFPVCRPC	cellulose synthase A catalytic subunit 7 [UDP-forming] [Cannabis sativa]	1731730747
VGMVAGSGqMSYGPSSYqTAPMVASGAPAVAVPSP	nuclear transcription factor Y subunit C-2 [Cannabis sativa]	1731684420
VGVVPDGPNGVEICEnnKPMGSNGPQAAQFS	zinc finger protein CONSTANS-LIKE 4 [Cannabis sativa]	1731665421
VHKDQYFPADLLLLSSSYEDGICYVETmNLDGETNLKL	probable phospholipid-transporting ATPase 8 [Cannabis sativa]	1731741204
VIDANNNNNNnnNNNNNNNGTSTRLRKNEDEDEEEEVDQKAAALVM	transcription factor MYB54 [Cannabis sativa]	1731691069
VIDAPVnGLDFDnLYLDmNGIIHPCFHPQGLPAP	uncharacterized protein LOC115716957 isoform X2 [Cannabis sativa]	1731706938
VIFAYTYmGPHIDVNGW	putative pectinesterase 63 [Cannabis sativa]	1731680439
VISSGRSIHGSVDNPIVIqDSSPGIEN	uncharacterized protein LOC115724893 [Cannabis sativa]	1731728879
VIWSMVGAqATEQGDCSKFKDGnMPHCCKTnPTVVDLLP	COBRA-like protein 4 [Cannabis sativa]	1731684627
VKADTVGNNNnnNNGIEETSTGTTTT	GATA zinc finger domain-containing protein 14 isoform X2 [Cannabis sativa]	1731669951
VKHMQENEFLHEVFGF	interferon-related developmental regulator 1 [Cannabis sativa]	1731686787
VKKGEEMAETYNLIDMSEIPGQQCLCSSSRDVSQLn	lysine-specific demethylase JMJ25 isoform X2 [Cannabis sativa]	1731720575
VKVAnKDFmFnGInKYEVGNFEMDVEDNELKAATSCE	DYRK-family kinase pom1 [Cannabis sativa]	1731676327
VLDLSnVVLGNSLITmYG	pentatricopeptide repeat-containing protein At1g43980, mitochondrial isoform X2 [Cannabis sativa]	1731744379
VLLEDLACAVCGnSAPKKCSRCKSVRYCSQKCQEVHWKnGHKnHC	ubiquitin carboxyl-terminal hydrolase 18 [Cannabis sativa]	1731665382
VLMNInRSGnKKQGGTFKCNSTEEITPNQmRSSACKmVR	meiosis-specific protein ASY1 isoform X2 [Cannabis sativa]	1731691155
VLPSYGSRSVDCFEKLEqIGEGTYGqVYmAKDNKTGET	cyclin-dependent kinase C-2 [Cannabis sativa]	1731693235
VLqRLCFGNqCCIPAVGIAGIFC	uncharacterized protein LOC115710443 [Cannabis sativa]	1731688097
VLSITAEKCRQLVGEDASSQSGqFTF	uncharacterized protein LOC115721192 isoform X1 [Cannabis sativa]	1731719519
VLSPIEEVASESLCGLSMTENDDSI	protein SMG7L [Cannabis sativa]	1731736588
VMHVNGNGPQGPYGKMVPmMGNVNGPPYGPKGMIDVHAMNDKKSSGSV	heavy metal-associated isoprenylated plant protein 34 [Cannabis sativa]	1731711820
VMNQqRAmAGNDRFQPMMYARPPPAVNYMPAPYPYPPP	heavy metal-associated isoprenylated plant protein 33 [Cannabis sativa]	1731726314
VNIGGGGERGQPSTPNmETSqSNNLANNSSNqSHIPVLIAQA	uncharacterized protein LOC115713635 [Cannabis sativa]	1731694303
VNSGPSMQLqGSASTAMQSHVHR	probable WRKY transcription factor 2 [Cannabis sativa]	1731729781
VnSWFSTALDRPCTLSRCSSSNYNFCMNKNKNIGMC	molybdenum cofactor sulfurase isoform X2 [Cannabis sativa]	1731687117
VPAmGEYLnQVHLEAPHHCTSLILPATGAMPDT	protein SIEVE ELEMENT OCCLUSION B [Cannabis sativa]	1731693200
VPDLVISGInKGSnCGYnIVYS	uncharacterized protein LOC115696800, partial [Cannabis sativa]	1731735842
VPIFLSIGYSTCHWCHVMEVESFE	spermatogenesis-associated protein 20 [Cannabis sativa]	1731663886
VPLVSADYGSSEGWIGAnVnPTLP	jasmonoyl--L-amino acid synthetase JAR4 [Cannabis sativa]	1731677309
VPNGYYYLVDAGYTNGQGFLAPFRGTRYHLYDWNDGYLPNTTEE	protein ALP1-like [Cannabis sativa]	1731736524
VPQIPKAGGGGGGGAKARRMVDDDEDSEVEMLS	exocyst complex component SEC5A isoform X2 [Cannabis sativa]	1731672282
VPSGNNDILGLAHQV	dof zinc finger protein DOF5.1 [Cannabis sativa]	1731739243
VPTVGTHEEASTSTGNAAFQVPPPSASmQRFPSmGNIPGqRVMTNSNGS	protein transport protein SEC16B homolog [Cannabis sativa]	1731704580
VqALRSPLPMFSYFGSVISDCK	uncharacterized protein LOC115694989 [Cannabis sativa]	1731732693
VQAQTLHSQnLVQTnnMLQQQNSMQSNQ	auxin response factor 19 [Cannabis sativa]	1731686064
VqGDVPqALmNRKLISLDm	chaperone protein ClpB3, chloroplastic isoform X2 [Cannabis sativa]	1731741890
VqHmLDEYCNTHETARAARSAAFLMKRq	uncharacterized protein LOC115703195 [Cannabis sativa]	1731672373
VQIVYmGEKQHHDPEHVTNMHHDMLSS	subtilisin-like protease SBT3.5 isoform X3 [Cannabis sativa]	1731704246
VQLLCDqHGNVAALHSRDCSV	acetyl-CoA carboxylase 1 [Cannabis sativa]	1731670403
VRGEDLQIIAPSR	11S globulin subunit beta [Cannabis sativa]	1731723280
VRNNVHEMSqLGNLKNAMEmLRNVTTEQSAV	agamous-like MADS-box protein AGL90 [Cannabis sativa]	1731667507
VSARDqITLqDTmEGVVYSTSqFGLDERF	sister chromatid cohesion 1 protein 4 isoform X2 [Cannabis sativa]	1731739858
VSARRPNLNVLGSVGHP	long-chain-fatty-acid--[acyl-carrier-protein] ligase AEE15, chloroplastic isoform X2 [Cannabis sativa]	1731722229
VSDAISMGTRGmCYSLqSRDLIADSVETVmSAQWYDG	dihydroxy-acid dehydratase, chloroplastic [Cannabis sativa]	1731723009
VSGEPPRMHAqSKSSqHEVNGAFAA	protein MODIFIER OF SNC1 1 isoform X2 [Cannabis sativa]	1731685654
VSHAPCSSNSNQENHPqPSTPqLA	translocase of chloroplast 90, chloroplastic [Cannabis sativa]	1731728270
VSKSENQTDHLmPFnEIHHQASDSDYLFASNSmVPADLMQQSVNL	AP2-like ethylene-responsive transcription factor PLT2 [Cannabis sativa]	1731710968
VSnGFGSIGGGSSALGSFGSNPTPQ	UBP1-associated protein 2A [Cannabis sativa]	1731695139
VSNKmSKEEIENLVQKTIEEmGLEHCADN	ABC transporter G family member 15 isoform X2 [Cannabis sativa]	1731685360
VSNLKQMNSSTCPDRTKVVENGICYAISLEGqKTGFYAD	uncharacterized protein LOC115696938 [Cannabis sativa]	1731736152
VSPLPKTTSVPMPTPNAnMPQNPP	uncharacterized protein LOC115695068 [Cannabis sativa]	1731732817
VSPNTDVDDLPQDTFTKE	vesicle-associated protein 2-1 isoform X2 [Cannabis sativa]	1731702916
VSPQQSSNPGSRGSSSPSSSQLP	uncharacterized protein LOC115715009 [Cannabis sativa]	1731697510
VSPSLTnSDFDAKPmVMLLGqYS	EH domain-containing protein 1 [Cannabis sativa]	1731731709
VSQENSNDASGYGQnNGNQLDMNGG	COP1-interactive protein 1 isoform X4 [Cannabis sativa]	1731704613
VSRKMSYIqHmKSSKYCICPMGYEVNSPR	probable glycosyltransferase At5g03795 isoform X2 [Cannabis sativa]	1731680470
VSSMPPQRKSRVEEFLnSENDKS	cell wall protein RBR3 [Cannabis sativa]	1731738031
VSWQSEVSWqFEPSGWHENHNLGSVL	ABC transporter B family member 19-like [Cannabis sativa]	1731674331
VTGWKVCMDYQELNNATRNDHFPL	uncharacterized protein LOC115695056 [Cannabis sativa]	1731732801
VTSYAHGSSDLLGIQIDAAINPGNSGGPAF	protease Do-like 2, chloroplastic [Cannabis sativa]	1731663840
VTVSQSSTFFVKQAATMNLKLnESF	protein NRT1/ PTR FAMILY 5.6 [Cannabis sativa]	1731683175
VVIVNENGSEIDYPVNDS	B3 domain-containing transcription factor VRN1-like [Cannabis sativa]	1731694533
VVnQSSSNSTENVNDSILSSH	LOW QUALITY PROTEIN: NF-X1-type zinc finger protein NFXL1-like [Cannabis sativa]	1731689251
VVQAINGEVHMPSqFGMLIqD	uncharacterized protein LOC115713554 [Cannabis sativa]	1731694166
VVTVmADRSSNKTSASPPPSGSADTNPSPAPEAQqSPSP	mavicyanin [Cannabis sativa]	1731734473
VVVTVmADRSSNKTSASPPPSGSADTNPSPAPEAqQSPSPPA	mavicyanin [Cannabis sativa]	1731734473
VWSQVRMVEDDLmYSTFLEVYENnCARnDKEADH	transformation/transcription domain-associated protein isoform X2 [Cannabis sativa]	1731692199
VYFANGCDLNLTVEMLIqLEHqVDNGFSPNPSPKTLSSPNLTAMDFPALNPTDGQnV	pentatricopeptide repeat-containing protein At4g33170 [Cannabis sativa]	1731667757
VYHDWCESFNTYPRTYDLLHSnYLFqTLSQRCEMVEmVA	probable methyltransferase PMT23 [Cannabis sativa]	1731673390
VYHqKKFRYEnAWSREPMCRMIIQTnWDmEASSSLDKK	uncharacterized protein LOC115702119 [Cannabis sativa]	1731662919
VYSFEGIGMCLPLESEmKEKnKYGKV	amino acid transporter AVT3B [Cannabis sativa]	1731671603
WAGNLPPnAITIEKMEQE	ribosome biogenesis ATPase RIX7 isoform X2 [Cannabis sativa]	1731704927
WAIWKAqNDMLWnGRSCSAADV	uncharacterized protein LOC115710573 [Cannabis sativa]	1731688305
WEEIESGPHPLGPLGLQQFYLDm	exocyst complex component EXO84A [Cannabis sativa]	1731736603
WEELnnLCKEYWTPAEPAARLEMAPMAANAAWNMGE	LOW QUALITY PROTEIN: serine/threonine-protein kinase TOR [Cannabis sativa]	1731663306
WGDFLASDENESVQGVLAEG	condensin complex subunit 3 [Cannabis sativa]	1731689666
WGKGRVTLLGDSIHAmQPNMGqGGCMAIEDSYqLALEL	zeaxanthin epoxidase, chloroplastic [Cannabis sativa]	1731692544
WGLLLqGGFSHAPDKLTYGVD	heparan-alpha-glucosaminide N-acetyltransferase isoform X3 [Cannabis sativa]	1731718355
WGPDANEFKPERFAEGVAqACRLSPqAY	cytochrome P450 714A1 [Cannabis sativa]	1731677928
WGPGSPAWDDLDANNNLLLQSH	LOW QUALITY PROTEIN: ethylene-responsive transcription factor ERF054-like [Cannabis sativa]	1731724981
WIASGHHAAVnFGQYAFAAYFPnRPPVTRTnMPSEEKES	linoleate 13S-lipoxygenase 2-1, chloroplastic [Cannabis sativa]	1731717174
WIAVGGTSIVGGGESFELTIDS	uncharacterized protein LOC115712136 [Cannabis sativa]	1731691122
WILEVRGSGLSTLGLVDLHKDNDSLnSVSEnITSSSFSYGQnGGFADS	uncharacterized protein LOC115710003 [Cannabis sativa]	1731687113
WIPSHTNFKPVSYHGPPnmSVS	uncharacterized protein LOC115719927 [Cannabis sativa]	1731715675
WLAAKqKSEWTKAYFKEGVKCDMLLnnMC	uncharacterized protein LOC115695395 [Cannabis sativa]	1731733354
WLALGLADEMKRSGSqFTWTnn	uncharacterized protein LOC115720071 [Cannabis sativa]	1731716038
WLEPKPSDMNELKWLSADLPFSCG	uncharacterized protein LOC115721950 [Cannabis sativa]	1731721178
WLIVmYKTIYFSRCIVHPnSKKnDSDHFCIDC	uncharacterized protein LOC115714364 [Cannabis sativa]	1731695948
WLNASYVPVLKqLqDSETqNY	probable galacturonosyltransferase 10 [Cannabis sativa]	1731743066
WLRTKGWRPEAVnIGGGGERGQPSTPnMETSQSnNL	uncharacterized protein LOC115713635 [Cannabis sativa]	1731694303
WmSGGQRRLSKVANPSnH	S-type anion channel SLAH2 [Cannabis sativa]	1731707803
WNGMISGYVqnGFMVEASnCFRDmVSARIEPDLVTFASFLPCVTESG	pentatricopeptide repeat-containing protein At4g21300 [Cannabis sativa]	1731730890
WNIIqLTSEDnF	neurofilament medium polypeptide [Cannabis sativa]	1731698097
WPADELLMKYqYISDF	ethylene receptor [Cannabis sativa]	1731670544
WPEEKLVNSnPMAVSSPSmRS	uncharacterized WD repeat-containing protein C3H5.08c [Cannabis sativa]	1731704482
WPEETPRNPDREDSLARQPQGVWQRDGTRD	uncharacterized protein LOC115706033 [Cannabis sativa]	1731677803
WPVAPNNGImPFSHPNHYmYAGPLGYSMNGNSRFCMqYSPVQHLPTP	uncharacterized protein LOC115701375 [Cannabis sativa]	1731746373
WSPATPSVGELAAAAEnCVW	LOW QUALITY PROTEIN: uncharacterized protein LOC115706064 [Cannabis sativa]	1731677889
WVDWQSGLADAIKDYFTDLFnSSPHTADAITDSIPTTISTAQnMF	uncharacterized protein LOC115704575 [Cannabis sativa]	1731674383
YAmLEDYFKQLLDTNPSSTAKLICEmqGDHRIFqRCYVCLHAC	uncharacterized protein LOC115720341 [Cannabis sativa]	1731668075
YAMPmLqGAAELSVNTSGADDDMIEYTNTLRNGILEAYSGIFQGFKG	importin subunit beta-1 [Cannabis sativa]	1731707480
YAVPVSYLNENKFRELLSMAEqEFGFDQPEGL	auxin-responsive protein SAUR21-like [Cannabis sativa]	1731728112
YCKGmLLAAVGIDPnnSqFPIAY	uncharacterized protein LOC115724609 isoform X4 [Cannabis sativa]	1731727727
YCLECDFKSHLLCGPLPSRIEY	uncharacterized protein LOC115725177 [Cannabis sativa]	1731730021
YDIFNDLNHHKSNDWDIqNVGLTFDASRQS	two-component response regulator ARR2 [Cannabis sativa]	1731721066
YDSSIDLKSTSVGNEIWADFn	putative dual specificity protein phosphatase DSP8 [Cannabis sativa]	1731701420
YEYIDnGnLEqWLHGDVGPVSPLTWDIRIK	probable receptor-like serine/threonine-protein kinase At4g34500 [Cannabis sativa]	1731744637
YFANqIGNLNLEKnVDEMK	putative disease resistance protein At3g14460 [Cannabis sativa]	1731723168
YFCRNGDIKKAADIVQNmTSNGCEPDIVTYG	pentatricopeptide repeat-containing protein At3g53700, chloroplastic [Cannabis sativa]	1731686215
YFLKPGYWFGKGGNKmEEG	ABC transporter A family member 2 [Cannabis sativa]	1731685373
YFNGDVMPTSLNYLYTTTVYSQSPI	putative leucine-rich repeat receptor-like serine/threonine-protein kinase At2g19230 [Cannabis sativa]	1731740117
YGHQHGQSQGLIFQPLDCnPTLQIGYNAGVTEQmSNNT	agamous-like MADS-box protein MADS2 isoform X2 [Cannabis sativa]	1731745104
YGSGYGAPQAKPPSNAP	spidroin-2 [Cannabis sativa]	1731665333
YHFSSQFTADLIAmNNADFIITSTYqEIAGSHN	sucrose synthase 2 isoform X2 [Cannabis sativa]	1731720968
YILTSKGMAAmLDKYKnYDFGRCPRVYCCGqPCLPVGQ	LOW QUALITY PROTEIN: casein kinase II subunit beta-2-like [Cannabis sativa]	1731704235
YLLAFMVmGnARGGKDGEGPSRTKSFEDADVLESEPGGVFSDSMAMAGS	SNF1-related protein kinase regulatory subunit beta-2 isoform X1 [Cannabis sativa]	1731746852
YmANGNLGKHLSDKqAYTLT	probable LRR receptor-like serine/threonine-protein kinase At1g05700 [Cannabis sativa]	1731743733
YmGnGNSLLCSKICCGVDLWPHGHQF	uncharacterized protein LOC115720390 [Cannabis sativa]	1731716843
YNEmmTmYISVGqVEKVSLVVEELK	pentatricopeptide repeat-containing protein At5g09450, mitochondrial [Cannabis sativa]	1731730181
YNQQQQLQQLQQQqqQQQYMAMmMNQQRGN	heavy metal-associated isoprenylated plant protein 34 [Cannabis sativa]	1731711820
YNRCSSFLYHFSSLSSPATTTSSnSDLVICLInTY	uncharacterized protein LOC115707083 isoform X1 [Cannabis sativa]	1731680499
YNYmNqYLLLnnQQLFLSPELQFQ	NAC transcription factor 29 [Cannabis sativa]	1731724431
YPGPGPVNGnWVGPqYPYGAPV	probable E3 ubiquitin-protein ligase LUL2 [Cannabis sativa]	1731712953
YPImVNTGGGSPLFLMDKLLCWn	uncharacterized protein LOC115721788 [Cannabis sativa]	1731668263
YPmSGQDFYVRVDSITLAKYKKDSnSSIn	G-type lectin S-receptor-like serine/threonine-protein kinase RKS1 [Cannabis sativa]	1731681363
YQGGSLAEQQYWSSDTEGEHLSLNLDSnGHYLVnSTGFnVmNVV	LOW QUALITY PROTEIN: G-type lectin S-receptor-like serine/threonine-protein kinase LECRK1 [Cannabis sativa]	1731666144
YQSVQDVLTCADVLSLNEYEGVSVSGNSGNF	uncharacterized protein LOC115702105 isoform X3 [Cannabis sativa]	1731662870
YSAAKYSSFQTETNLVGSAPYSEETAIPEYVETSEEn	ATG8-interacting protein 2 [Cannabis sativa]	1731705389
YSGGPYPAHGRGPGSQVGGYSSGQYPA	cyclin-dependent kinase C-2 [Cannabis sativa]	1731693235
YSTmRTVNVKRTITEMMASESTMSGGVSNYGHTQHISD	uncharacterized protein LOC115709503 [Cannabis sativa]	1731685839
YSYKGCDInVPSSnIISEH	nucleobase-ascorbate transporter 12 [Cannabis sativa]	1731713404
YSYWADPYTLFVMEMALMGFAEHRRFQDWYNPGSMSKQYFLG	chlorophyll a-b binding protein 8, chloroplastic [Cannabis sativa]	1731716826
YVPESEmGTSQALGLATTEQIDTNVnSnKTnENEPTANKDDTTEMEI	midasin isoform X4 [Cannabis sativa]	1731680344
YWTYGKSPFKEDEPLPPNGTDGIGENGKLGLASATGVGDDIKRCqVAG	INO80 complex subunit D [Cannabis sativa]	1731696852
YYGTLEDVMmFTFCGVYSVTLFRCKWFNTnPQR	uncharacterized protein LOC115695444 [Cannabis sativa]	1731733440
YYKmDmAADIqLLIFSEGKSNICPAD	mini-chromosome maintenance complex-binding protein isoform X2 [Cannabis sativa]	1731678461
AAAAAAATVAPIELSTSQSQEENTNR	protein kinase PINOID [Cannabis sativa]	1731738482
AAnGAGLPPEDKPKLCDVACEKELEnVPM	peptidyl-prolyl cis-trans isomerase FKBP16-3, chloroplastic [Cannabis sativa]	1731739928
ALFLSGVGGGGGGGPSKqmDA	uncharacterized protein LOC115710013 isoform X3 [Cannabis sativa]	1731687144
ALFLSGVGGGGGGGPSKqMDA	uncharacterized protein LOC115710013 isoform X3 [Cannabis sativa]	1731687144
DVPAARNSSHVnSGPSMqLqGSASTAmQSH	probable WRKY transcription factor 2 [Cannabis sativa]	1731729781
GGGGGGSGGGGSASGVSNnPFPDPSSAAGLPFFnLPMnNmPQLP	AT-hook motif nuclear-localized protein 23 [Cannabis sativa]	1731670913
GSDFSGYGEIGNGGNnSFKSYGLnGNNPK	polygalacturonase 1 beta-like protein 3 [Cannabis sativa]	1731689875
IADGNELLRFHCATFmCSLGLNGSSNLCNSM	uncharacterized protein LOC115697242 [Cannabis sativa]	1731669151
KLVDnEqmFEKYPWGP	uncharacterized protein LOC115712369 [Cannabis sativa]	1731691633
LGLCGSGFAALnPCnSSDHVNPNRPEPFGTGSAGLPTRD	protein NSP-INTERACTING KINASE 2-like [Cannabis sativa]	1731682808
LKqYqAKADYFACAmLqKNGGYNAHL	endoglucanase 5 [Cannabis sativa]	1731682789
LKqYQAKADYFACAMLQKnGGYnAHL	endoglucanase 5 [Cannabis sativa]	1731682789
MqIHAMGLKSVSCMPnPPGFmGIVPTSGPTSMTQ	cellulose synthase-like protein H1 isoform X2 [Cannabis sativa]	1731740051
PKANKSAAImSGGNKFGFGLFFQERPqYFSDGHRTYYG	blue copper protein-like [Cannabis sativa]	1731673876
PQNLAATPTTAASAYAVPQNLAATPTVAGSASnNS	protein SIEVE ELEMENT OCCLUSION B [Cannabis sativa]	1731694857
PYGRPRPSAqYIGnMqTARGSYVGSFGYQQ	RNA-binding protein 24-B [Cannabis sativa]	1731666568
QHMSSLQQQQPQPQQQQQQPSSSQQAHEHFGQQVPQ	transcription initiation factor TFIID subunit 12-like isoform X2 [Cannabis sativa]	1731686513
RGAAnGISmTVmSLFKAAGPAGGGALFSW	protein ZINC INDUCED FACILITATOR 1-like [Cannabis sativa]	1731733368
RKGGTKIISLqTTmNDDnSEDGCDALPPPASILLPCGSCS	DPH4 homolog [Cannabis sativa]	1731733742
RKSYmGNDHATnGPnmAKELVPVTSTST	RNA polymerase II C-terminal domain phosphatase-like 3 [Cannabis sativa]	1731692363
SGDETVPYHSLSWCKNWLGPKVNITRTPQSEHDGS	phospholipid--sterol O-acyltransferase isoform X2 [Cannabis sativa]	1731697912
SmNSVGIKTAnImSHVALqSGGYERMP	protein FAR1-RELATED SEQUENCE 5-like [Cannabis sativa]	1731688687
SSILmSEQKSVAAAKqTSPmKVEISNTCSFm	uncharacterized protein LOC115714399 [Cannabis sativa]	1731696038
TMSNHADQVWGVAFGPAGGPG	WD repeat-containing protein VIP3 [Cannabis sativa]	1731682502
VAIGGSENFYSTFESEFAGVI	eukaryotic translation initiation factor 6-2 [Cannabis sativa]	1731738961
YSFSVKVEEGCqMNTVDqIAASVNqMMHRINAEL	transcription factor bHLH94 [Cannabis sativa]	1731671249
AAPGGGAASAPRGQSPSGASGY	heterogeneous nuclear ribonucleoprotein 1 [Cannabis sativa]	1731695089
AEKEDISCGDSqqGKGNLLE	uncharacterized protein LOC115704233 [Cannabis sativa]	1731673839
AEVVSSSTEMEPDNVATGVKEG	uncharacterized protein DDB_G0271670 [Cannabis sativa]	1731725935
AGLVYEFVFISHTGHEqLPTTD	aquaporin TIP1-1 [Cannabis sativa]	1731685516
AGqLKInVDGAIFEATDqISTCFVARDCEGRLVETFST	uncharacterized protein LOC115702242 [Cannabis sativa]	1731663140
ALQLGMEIHAMVTKTGFn	pentatricopeptide repeat-containing protein At4g02750-like [Cannabis sativa]	1731724152
ANVKFCWYqPSSKDEISKIFSHG	LOW QUALITY PROTEIN: probable inactive poly [ADP-ribose] polymerase SRO5 [Cannabis sativa]	1731687686
APVTEAASEDAGEDIPEEEAVCRICF	uncharacterized protein LOC115700731 [Cannabis sativa]	1731744861
ATQAIPmTTMSSGLSSPEVVSHVSQMDTLSHAPADSSNMG	uncharacterized protein LOC115720000 [Cannabis sativa]	1731715860
AVNVCYAVDYIVGDSAGW	blue copper protein-like [Cannabis sativa]	1731725852
CHLVDLqFLDLSSNDmSSRIPnCLS	receptor-like protein EIX1 isoform X2 [Cannabis sativa]	1731672844
CHSIEVALDALqSIPDLDDELLLDACDL	L10-interacting MYB domain-containing protein isoform X2 [Cannabis sativa]	1731742002
CQGmRCPANTHKPSFHVNTSLTTKHSVGKGSSSGQKGGKmPANnVEDCMT	uncharacterized protein LOC115722314 [Cannabis sativa]	1731722078
DCDSNAQKnKVKEVVnLmEIELGNGF	protein CHROMOSOME TRANSMISSION FIDELITY 7 [Cannabis sativa]	1731695934
DGYCPEVSVKIGGDSLqTSTW	interferon-related developmental regulator 2 isoform X2 [Cannabis sativa]	1731667100
DMNNIRINSmAASENEETSTTCTYTTVLSYDMLINN	E3 ubiquitin-protein ligase Praja-2-like [Cannabis sativa]	1731709302
DPQLLNmLQqqYLLq	uncharacterized protein LOC115700657 [Cannabis sativa]	1731670106
EEALRqVGSnSVELAmEWLFSHPEEVHED	LOW QUALITY PROTEIN: E3 ubiquitin-protein ligase UPL2-like [Cannabis sativa]	1731669273
EEVTRImNVEADCPYEILGInqnR	nucleolar and coiled-body phosphoprotein 1 [Cannabis sativa]	1731742136
EGIPGENDTEIqHL	DNA mismatch repair protein MSH1, mitochondrial isoform X3 [Cannabis sativa]	1731724367
EHLDGQRGRILDFn	calmodulin-binding receptor-like cytoplasmic kinase 3 [Cannabis sativa]	1731730072
EKGCQATQGENPFIWQCWAVLEKSmGNI	protein high chlorophyll fluorescent 107 [Cannabis sativa]	1731745238
EKQQSLLDQNnNNYDYDYDYELVS	terpene synthase 10 [Cannabis sativa]	1731704070
EKSGSFqSSqPLGVVNDDSSGRLDVPDQLGSHmYGPINS	histone-lysine N-methyltransferase ASHH2 isoform X2 [Cannabis sativa]	1731669482
EQDGQGSPDEIKPVSLDSENPSLRLSDqEmqD	GATA transcription factor 28 isoform X3 [Cannabis sativa]	1731710178
EVFTDSLENFDPSNLAVLQLDQCG	uncharacterized protein LOC115705507 [Cannabis sativa]	1731676484
EVILQDSRKTnKEnNLSVEISDSQmE	uncharacterized protein LOC115696397 [Cannabis sativa]	1731735160
FAKHnnAAHnSVVTHRR	protease Do-like 10, mitochondrial [Cannabis sativa]	1731742833
FGQDNYGSASYRLGTPYLGNPMAnSVLPSVGSGSPmLQnE	pumilio homolog 4 [Cannabis sativa]	1731672789
FHDLHNDGFPRLKELSFGNNDGFH	disease resistance protein At4g27190-like [Cannabis sativa]	1731733718
FQVDHLPnnQAnWSSFVVESFYKTYDKYTIEAAHAA	uncharacterized protein LOC115719331 [Cannabis sativa]	1731663779
FSNTNGNNVRVRNYSVQRGRWnEGS	probable DEAD-box ATP-dependent RNA helicase 48 [Cannabis sativa]	1731706291
GAADPAPEQWGKTTVEEQYESSIGGW	dynamin-related protein 5A [Cannabis sativa]	1731678479
GAPGPSmVNNSGNNRQqLMSAAPSqP	SWI/SNF complex subunit SWI3C isoform X2 [Cannabis sativa]	1731669813
GDIGVGIGCGFnNNQMSSSGGGGGGGGGGSGSPSAVG	LOB domain-containing protein 12-like [Cannabis sativa]	1731738763
GGqHPGGIGVPAVGmAFPGY	protein MLN51 homolog [Cannabis sativa]	1731675896
GIAEYSLSqSnLETIFnHFA	ABC transporter A family member 1 [Cannabis sativa]	1731685354
GKGGGKGGKGSGAGGGGGGKMGqMGEmGRGGGGG	heavy metal-associated isoprenylated plant protein 34 [Cannabis sativa]	1731711820
GKVDETCMQSREIWTGVTYGVAATMILAGmEEQAFA	LOW QUALITY PROTEIN: non-lysosomal glucosylceramidase [Cannabis sativa]	1731721635
GLLHDRSKLNDGLEECRS	DNA-directed RNA polymerase III subunit 1 [Cannabis sativa]	1731678375
GPIAWVAnRCNPIQDSSSGS	G-type lectin S-receptor-like serine/threonine-protein kinase SD1-1 [Cannabis sativa]	1731714857
GSqVVTAGIKTDYNqQYNNnLMATGCCG	uncharacterized protein DDB_G0283357 [Cannabis sativa]	1731690782
GSYTVQQNYSnMDIHVGQSYSFLVTMDQNASSDYYIVASP	monocopper oxidase-like protein SKU5 [Cannabis sativa]	1731695554
GVAGYVPGAQFFGTVPAAAPPmSGING	uncharacterized protein LOC115717965 [Cannabis sativa]	1731709018
GYCLDGFERLLVYE	LOW QUALITY PROTEIN: receptor protein kinase TMK1-like [Cannabis sativa]	1731725542
HCQELQCLPEELPTSLSSLDIYN	putative disease resistance RPP13-like protein 1 [Cannabis sativa]	1731687674
HFLSENQISTVnY	DEAD-box ATP-dependent RNA helicase 39 [Cannabis sativa]	1731669498
HLKVMTGQPMPNSGPMMNFSSFGGSQqF	probable transcription factor PosF21 [Cannabis sativa]	1731723629
HqPINNNNNNGDIISPNFGFMNNHHQ	LOW QUALITY PROTEIN: NAC domain-containing protein 43-like [Cannabis sativa]	1731683118
IDNGVLGSPAVPPLSTADSPqSSnAm	uncharacterized protein LOC115719896 [Cannabis sativa]	1731715611
IEKINNDDNnnnKQQVVVANNDHD	uncharacterized protein LOC115721364 [Cannabis sativa]	1731720051
IGAMLEEIqGLYQQHHQ	transportin MOS14 isoform X2 [Cannabis sativa]	1731686972
IGLTWqEMQETLLSFDS	uncharacterized protein LOC115702365 [Cannabis sativa]	1731670648
IGVGIGCGFNnNQmSSSGGGGGGGGGGSGSPSAVGG	LOB domain-containing protein 12-like [Cannabis sativa]	1731738763
IKMNDRKDKnALDYLEGSLLMnQG	cytokinin dehydrogenase 3 [Cannabis sativa]	1731673693
IKNGGqPVSSSDqLAQQRDCSS	uncharacterized protein LOC115698247 [Cannabis sativa]	1731739277
IMGFEVVPQECVEYIqqY	acid phosphatase 1 [Cannabis sativa]	1731698069
ISLSDYDEFVEDGNGDLVNKmMASKHLFE	extra-large guanine nucleotide-binding protein 1 [Cannabis sativa]	1731672371
IVKQGNAMGLPPnSSDAHTINGKPGP	laccase-11 [Cannabis sativa]	1731696075
LASnRHGNPGSTPLSGPNS	serine/threonine protein phosphatase 2A 57 kDa regulatory subunit B' theta isoform [Cannabis sativa]	1731746366
LFmNQLSGNIPEGLGKLPGLMDFSLFMnnL	receptor-like protein kinase 5 [Cannabis sativa]	1731676850
LGDIVGLEGKEHnDGVDAMEH	uncharacterized protein LOC115713619 [Cannabis sativa]	1731694279
LGDNLGAPGNRSTAPDMLNm	protein PLASTID MOVEMENT IMPAIRED 1-RELATED 1 [Cannabis sativa]	1731675683
LGIKNNEISNLFEDGMqFYSINCY	protein SRG1-like [Cannabis sativa]	1731724587
LGSLSVGLAGDPYVFYDWSVSY	monocopper oxidase-like protein SKU5 [Cannabis sativa]	1731695554
LGVVGGADGPSFSDETEEDLLSmYLD	probable transcription factor PosF21 [Cannabis sativa]	1731723629
LNPPDQKNGLGnnKGGSSSSS	probable serine/threonine-protein kinase PBL11 [Cannabis sativa]	1731667189
LPQMFNYENKGGGGGVDSNHL	nicalin-1 [Cannabis sativa]	1731712995
LPSRNSNLSDTESAVqSNHTNGYG	F-box protein At1g78280 [Cannabis sativa]	1731712039
LVSAESISCANVCCnAAKNTVSmVT	protein phosphatase 2C 16 [Cannabis sativa]	1731680315
mAFVSLEFRCSNAGGDVVEIAPKPVnPDCFV	defensin-like protein 58 [Cannabis sativa]	1731667743
MnLmWnSEIVIDGGnDTLVATSLLEAS	LOW QUALITY PROTEIN: uncharacterized protein LOC115705182 [Cannabis sativa]	1731675672
MQHDqATIVDSGGIVCRGSASPVEMD	LOB domain-containing protein 12-like [Cannabis sativa]	1731675502
NAnLEGALATGnTSF	thylakoid lumenal 15 kDa protein 1, chloroplastic isoform X2 [Cannabis sativa]	1731672832
nGKSFSSSnGGEEGGKGnLFGELSR	cytochrome P450 71A1 [Cannabis sativa]	1731684770
NLQDSVqALNDmSFDTVQSFVSAAm	putative invertase inhibitor [Cannabis sativa]	1731673709
NmEDLVqTKTMGnVEDGREGSASS	uncharacterized protein LOC115722274 isoform X2 [Cannabis sativa]	1731721968
nnALPKKVVAVDnDGDDSmYKSSFGGLSKSETSADD	probable inactive receptor kinase At2g26730 [Cannabis sativa]	1731740839
nnnHRHRGNAGGGGGGGRTPKPPQSDQSLTVTT	RNA-binding KH domain-containing protein RCF3 [Cannabis sativa]	1731705231
NPANSRPTDPGSIVMPPqVHnQGQ	mediator of RNA polymerase II transcription subunit 15a isoform X2 [Cannabis sativa]	1731683138
NPRNDVAPqNDVGGNKLGEMPSIQH	light-inducible protein CPRF2 isoform X2 [Cannabis sativa]	1731695226
NSGNNNGnCGGVIVEMGKGGVAG	myb family transcription factor EFM [Cannabis sativa]	1731681529
NSPAEVSKDVDVLVImVTNESqAEnALFG	uncharacterized protein LOC115716025 [Cannabis sativa]	1731704597
NTEYMAmMKRMAELEEKVSVLnMKPVSMPPEKEEM	phosphatidylinositol/phosphatidylcholine transfer protein SFH3-like [Cannabis sativa]	1731673279
PAGKEQTEAHSGAKnmTAIRNS	uncharacterized protein LOC115710453 [Cannabis sativa]	1731688111
PAPNPFETqDPFAMSNnIAAPHSVqMAAMTQ	putative clathrin assembly protein At2g01600 isoform X2 [Cannabis sativa]	1731692536
PCAPGRQYYGRGPMQLSWNY	endochitinase 2 [Cannabis sativa]	1731664173
PIGGLGEIGmNCMLVGNYDRYILIDAGVMFP	ribonuclease J isoform X1 [Cannabis sativa]	1731685899
PnDRSKAGFGETDCKAITDAVNFPKDD	uncharacterized protein LOC115703967 [Cannabis sativa]	1731673408
PPHLAAGmTSFPYYPVSVCLQPGQMPTNHSWPSFGnSSS	two-component response regulator-like APRR1 [Cannabis sativa]	1731690163
PPSINPPSWAGFSPLAAYLFSWQ	mediator of RNA polymerase II transcription subunit 16 isoform X3 [Cannabis sativa]	1731739083
PQNPSPFQAPGnLGLMADGSnFSLG	nuclear pore complex protein NUP1 [Cannabis sativa]	1731676205
QHENDIKWPNGLSFFnALTGKSDDAK	protein RICE SALT SENSITIVE 3 [Cannabis sativa]	1731677510
QLqGGGGFIVNPLAEISRNPmGNSM	TORTIFOLIA1-like protein 3 [Cannabis sativa]	1731690415
QMVYASAVEmADAGVNNPKFnVTWnFNVDGAFTY	probable receptor-like protein kinase At4g39110 [Cannabis sativa]	1731732207
QNGHSENSVRAESDSTEKSNSFVGTEEYVAPEIISGEGH	serine/threonine-protein kinase OXI1 [Cannabis sativa]	1731695757
QQFDMYQDFSQGLIVGANSInQCGQDPLPNVLP	transcription factor VOZ1 [Cannabis sativa]	1731742615
QqTLPSLKACAAGYQSSVDFNANRmKGVYm	beta-amylase 7 isoform X3 [Cannabis sativa]	1731679087
QQYPHqPPLqYmGYNqQGIPPQGH	DEAD-box ATP-dependent RNA helicase 40 [Cannabis sativa]	1731737630
qSPAAAPSKTPAAPAP	lysine-rich arabinogalactan protein 18 [Cannabis sativa]	1731692705
QVPNqPVmPqQNGNPHPSQmQTLTAPP	histone acetyltransferase HAC1 isoform X4 [Cannabis sativa]	1731693398
REKMSETAmRKLEDELEnmKCLARQKEEDAQH	kinesin-like protein KIN-12C [Cannabis sativa]	1731722587
RIFFGGFFIRGHAYTmDTISFAVqFWSqGEAqAMF	pantothenate kinase 2 [Cannabis sativa]	1731686286
RKENGKCPAVCGAnDmEIDGNVTSLHHGVSLPSHL	ubiquitin carboxyl-terminal hydrolase 26 isoform X3 [Cannabis sativa]	1731669223
RKRGVFqKELqHmmYGFGDDPNPL	transcription initiation factor TFIID subunit 13 [Cannabis sativa]	1731697408
RLLFCNMGqRNVVSWTTmVAGYAnCGDMEAAKE	putative pentatricopeptide repeat-containing protein At5g37570 [Cannabis sativa]	1731720827
RSANRVAHCIARNSCFW	uncharacterized protein LOC115711045 [Cannabis sativa]	1731689038
SAAPTDQAPPEPADPLAEP	putative bifunctional UDP-N-acetylglucosamine transferase and deubiquitinase ALG13 [Cannabis sativa]	1731720726
SAVMSSSTKTSnGVLGEITnSnDISSPR	tyrosine/DOPA decarboxylase 1-like [Cannabis sativa]	1731721009
SGDYGNIPRHALGDPGDF	protein ENHANCED DOWNY MILDEW 2 isoform X2 [Cannabis sativa]	1731734257
SKLSSMmPDLEVPqESLASTSVKGSS	uncharacterized protein LOC115715312 [Cannabis sativa]	1731698399
SLANNNGGGGGGSSNLnVFGGFmNALGG	protein indeterminate-domain 4, chloroplastic [Cannabis sativa]	1731724061
SPGKVENRRENNNnnqEEYVER	probable auxin efflux carrier component 1c [Cannabis sativa]	1731685974
SRLEYENLVELMEqNASGAGqSPVNFVG	LOW QUALITY PROTEIN: conserved oligomeric Golgi complex subunit 4-like [Cannabis sativa]	1731676370
STMFNSKIIGLVNGTAAGWGNmGGGATQLLMPVVYE	high affinity nitrate transporter 2.4 [Cannabis sativa]	1731718917
TAqPqAnLIEHTLDYDPHAFIAQSILDFGDDVGWYVD	uncharacterized protein LOC115695949 [Cannabis sativa]	1731668951
TGDGGPSGRFEQTNTNMESSGVDFAGIKEKQDFLHGKHD	uncharacterized protein LOC115723978 [Cannabis sativa]	1731725828
VAELEGSDAGINDQVNSSKENDNQTSIDLPVSSIDmEDK	chromatin structure-remodeling complex protein SYD isoform X2 [Cannabis sativa]	1731724728
VEASGVnGEIGDSSLmDV	uncharacterized protein LOC115716267 [Cannabis sativa]	1731705251
VIRSDnQIPVEEPInEDESVPGGSAQTRDYYS	protein OCTOPUS [Cannabis sativa]	1731737223
VKCLAMIGnKVYCGCSGYnIQEVDLC	LOW QUALITY PROTEIN: putative E3 ubiquitin-protein ligase LIN-1 [Cannabis sativa]	1731663568
VKEDmnRnYRGIWYGDSPFnFVFP	LOW QUALITY PROTEIN: cation/H(+) antiporter 15-like [Cannabis sativa]	1731675371
VLIMKNNNNKRVAVDDDNSmCLVPDnHqP	transcription factor PIF4 [Cannabis sativa]	1731663651
VMEHLTFALSVCnqSSVLAnQVEEIMPGVY	protein NPG1 [Cannabis sativa]	1731742539
VMSSAAGKTPAPGqAMYSASKHALNG	dehydrogenase/reductase SDR family member 7 [Cannabis sativa]	1731713455
VNAGFEVGVVPFnPDGWGPME	eukaryotic translation initiation factor 3 subunit D [Cannabis sativa]	1731682946
VNLWTmVLTNHTNPQIWGPDSF	cytochrome P450 714C2 [Cannabis sativa]	1731710909
VPLEGENAASnLDDGSFqqVVKMSKF	beta-amylase 1, chloroplastic [Cannabis sativa]	1731707189
VSnYACVQSHSSFQTEEFLEmKP	heat stress transcription factor B-2a [Cannabis sativa]	1731706840
VVLLELATGREAnnGGGDEH	receptor-like protein kinase 5 [Cannabis sativa]	1731677945
VWHAITGYWGGVKPGVKEMEGYDSVm	probable galactinol--sucrose galactosyltransferase 6 isoform X2 [Cannabis sativa]	1731728596
WAnEVRVFInGGGGGGAGGGGnGR	probable membrane-associated kinase regulator 4 [Cannabis sativa]	1731689325
WLQHSNGAKLITDqDSVSVASSQENG	protein VASCULAR ASSOCIATED DEATH 1, chloroplastic isoform X2 [Cannabis sativa]	1731676283
WnIEDVqVnVFVPFmLSY	putative disease resistance protein RGA3 [Cannabis sativa]	1731689034
WPSAGNLPAAPSRGGNVPS	rhomboid-like protein 20 [Cannabis sativa]	1731744314
WVGEECQYVNLIVnGAEH	B3 domain-containing transcription factor VRN1 [Cannabis sativa]	1731694529
YnGKWWEGLITnVSKDCLN	protein AGENET DOMAIN (AGD)-CONTAINING P1 [Cannabis sativa]	1731707502
YPLPGmNPSGATNGPNmPVVMVY	LOW QUALITY PROTEIN: uncharacterized protein LOC115705525 [Cannabis sativa]	1731676521
YSSMDLKKSmEDGEKRFNqLSIEERGK	uncharacterized protein LOC115720760 [Cannabis sativa]	1731717927
