# Supplementary material for: Hempseed and hempseed protein extract: antioxidant potential, peptidomic analysis and muscle cell protection under heat stress conditions
Source: Research Square preprint supplement (doi:10.21203/rs.3.rs-6511890/v1), 2025-05-28
Supplement: Supplementary file 3 [file 98679de45db0a4fb70e8cd88.xlsx]

## Sheet: Foglio 1
SATPdb	Common peptides in HSDpe and HSD (165)
	Antioxidate	ACEinhibitor	Antihypertensive	Drug deliv vehicle
	YGLN; VPVTST	ALPP	ALPP; LPPP; AMQS; LQQQQ; AGLP; LLRF; TVDQ; TVPY;	YPWG
	Peptides exclusively expressed HSDpe (1611)
	Antioxidate	ACEinhibitor	Antibacterial	Anticancer	Antifungal	Antihypertensive	Antimicrobial	Antiparasitic	Antiviral	Cell cell comunic	Drug deliv vehicle	Toxic
	MEMK; ADGF; AGGF; ELLI; FIGP; GFVG; GGRP; GIFE; GTQY; HHPL; HPHL; HPLH; LVSK; NHAV; PLHH; PYPQ; TSTA; VGDI; YGLN;	AFLL; AGSP; AGSS; ALEP; ALPP; APER; DAGP; EKGP; FVAP; FYQQ; GAGP; GTQY; GVHGV; HIRL; IYLL; LALPP; LAMA; LHLP; LLPSY; LPLP; LQSW; LSPA; LVRT; MDLA; MLPVY; PQPIP; QAFT; QPIP; SDGS; VSGP; VVPP; YGGY; YLLF; YNKL; YQGS; YTGN;	FSAR; TPPQS; YPYP	DEVD	FSAR; TPPQS; YPYP	AGLP; AGSP; AGSS; ALEP; ALPP; AMQS; AWPQ; DERF; FDKA; FLPP; FVAP; FYQQ; GLFG; GMGA; GPPGAP; GPPP; GVGY; GVHGV; HDHM; HIRL; IKPVQ; INQF; INSQ; IQHST; IYLL; LALPP; LAMA; LGGC; LHLP; LPLP; LQQQQ; LQSW; LSLP; LSPA; LVRT; MDLA; NAQRP; NQFLP; PQPIP; QAFT; QPIP; RPLA; SLPQ; SPYP; STYQT; TCSP; VVPP; VVVPP; YGAP; YGGY; YLLF; YNKL; YYRA;	FSAR; TPPQS; YPYP	FSAR	AGLP; AGSP; AGSS; ALEP; ALPP; AMQS; AWPQ;	NNGNN	EEEAA; GRDS; RRRR; VPTLK;	LWKT; YPYP
	Peptides exclusively expressed in HSD (1106)
	Antioxidant	ACEinhibitor	Antibacterial	Antifungal	Antihypertensive	Antimicrobial	Antiviral	Cell cell comunic	Drug deliv vehicle	Toxic
	ADGF; AWFS; DHHQ; DLEE; FYQL; GAWA; GGRP; GIFE; GTQY; HHLP; LLHH; LLPF; LQGM; NHAV; TSTA; TVYQ; VDYP; VGGRP;	AAATP; AGSP; AGSS; ALPP; GDAP; GTQY; GWAP; LALPP; LAMA; LEPP; QPIP; YQGS;	YPYP	LLLE; YPYP	AGLP; AGSP; AGSS; ALPP; EEAGG; FAVP; GDAP; GLFG; GPAM; GWAP; IEKP; INSQ; KQMK; LALPP; LAMA; LEPP; LEQL; LGGC; LKELQ; LKPI; LLNP; LPPP; LQPSS; LQQQQ; LSLP; LVQGS; QNIPP; QPIP; QVVF; SPYP; TVDQ; VEGY; VKEDQ; VLGP; VRGP; VWIS; YGAP;	FDDF; LLLE; RRRR; SFNL; YPYP	FDDF; RRRR; SFNL	NNGNN	GRDS; RRRR	YPYP
DFBP	Common peptides in HSDpe and HSD (165)
	Antioxidant	ACE inhibitors	Renin inhibitory	Antihypertensive	DPP IV-inhibitory	Celiac disease
	YGLN; SGGY; VPVTST;	GLFF;GSEN;AATP;AGLP;GRPR;TVDQ;AAAT;ALPP;LPPP;TVPY;TSGP;	GLFF	GLFF	GPAG; VAAA	QQQP
	Peptides exclusively expressed in HSDpe (1611)
	Antioxidative	ACE inhibitors	Antihypertensive	Antimicrobial	Antithrombotic	Antiviral	DPP IV-inhibitory	Opioid	PEP-inhibitory	Mineral-binding	Neuropeptides	Celiac disease
	ADGF;AGGF;CSGD;DSAI;EFIQ;EFLQ;EIPT;ELLI;FEQI;FIGP;GFVG;GGIF;GIFE;GTQY;HHPL;HPHL;HPLH;LDQW;LVSK;MEMK;NHAV;PLHH;PYPQ;SVYT;VGDI;YGLN;YLGY;YQKF;	AAAT; AFLL; AGLP; AGSP; AGSS; ALEP; ALPP; APER; AWPQ; DAGP; EDLE; EFIQ; EFLQ; EIPT; EKGP; FEEF; FEQI; FVAP; FYQQ; GAGP; GGIF; GIFE; GSEN; GTQY; GVHGV; HIRL; HLHT; ILDL; INSQ; IYLL; LALPP; LAMA; LEGR; LHLP; LLPSY; LPLP; LQSW; LSPA; LVRT; MDLA; NAQRP; NDPP; PAFG; PLAP; PNLG; PQPIP; PYPQ; QPIP; SDGS; SLPQ; SVYT; TSGP; VPAF; VSGP; VVPG; VVPP; YGGY; YLGY; YLLF; YNKL; YQGS; YQKF; YTGN; YYRA;	GVGY; INSQ; LPLP; LQSW; SLPQ; YGGY; YLGY; YNKL; YYRA;	EIPT	GPGG; GPRG; NQDK; RPGP; SSGE	LLEY	AIAV; ALAV; FLQP; GPAG; GPGA; GPGG; ILAP; IPSK; LIAP; MPVQA; VAAA;	YLLF	PIPY; PPPLP; PPPV;	YLLF	FLRF; NFLRF	PSQQ; QPYP; QQPY; QQQP;
	Peptides exclusively expressed in HSD (1106)
	Antioxidant	ACE inhibitors	Antihypertensive	Anticancer	Antithrombotic	Antiviral	DPP IV-inhibitory	Immunomodulatory	PEP-inhibitory	Celiac disease
	ADGF; ADHP; AWFS; DHHQ; DLEE; EFQI; ELIN; FYQL; GAWA; GIFE; GTQY; HHLP; LEEAF; LLHH; LLPF; LPENAKVDQVK; LQGM; LVPK; NHAV; SGGY; TVYQ; VDYP; VGGRP; YEGS;	AAAT; AAATP; AATP; AGLP; AGSP; AGSS; ALPP; AWFS; EFQI; ELIN; EPVQ; FEEF; GDAP; GIFE; GTQY; GWAP; INSQ; KQMK; LALPP; LAMA; LEEAF; LEPP; LGVP; LLNP; LPPP; PLAP; PNLG; QPIP; QVEY; SWVE; TVDQ; VDHV; VEGY; VRGP; VVPG; VWIS; YQGS;	INSQ; VEGY; VWIS	DEDDD; LVPK	DGEA; GPGG; GPRG; KDGEA; NQDK; SSGE;	IYEG; LEYS; LLEY	AAATP; GPAG; GPGA; GPGG; LPVP; LPVPQ; MPPPL; VAAA; VLGP; VRGP;	TRKP	PPPLP	PSQQ; QPYP; QQQP
